# Supplementary material for: Microbial sources of exocellular DNA in the ocean
Source: Research Square preprint supplement (doi:10.21203/rs.3.rs-431074/v1), 2021-05-05
Supplement: Supplementary file 2 [file d45a763156850d6e4788e79c.xlsx]

## Sheet: Summary
Dataset S4	Host-associated phage gene counts for each dissolved DNA sample (vesicle, viral, and free DNA) annotated from the ALOHA 2.0 catalog metadata
Sheet1:AllPhageHostDDNA
Column Descriptions
Sample Name	Sample Name
Sample Collection Depth	Depth (m)
Dissolved DNA Type	(Vesicle, Viral, FDNA)
Sample Location	Coordinates sample was collected from
Columns F-DW	Host-associated phage determined by ALOHA 2.0 catalog
Sheet2:MajorPhageHostDDNA	Data used in main and supplementary text (as proportions).
Sample Name	Sample Name
Sample Collection Depth	Depth (m)
Dissolved DNA Type	(Vesicle, Viral, FDNA)
Sample Location	Coordinates sample was collected from
Columns F-M	Major host-associated phage (cutoff: ≥5%) contributing to all dissolved metagenomic DNA (vesicles, viruses, and free DNA/FDNA) gene counts

## Sheet: AllPhageHostDDNA
Sample Name	Sample Collection Depth (m)	Dissolved DNA Type	Sample Location	Cruise Number	No Host	Achromobacter	Acinetobacter	Actinoplanes	Aeromonas	Aggregatibacter	Agrobacterium	Alteromonas	Anabaena	Arthrobacter	Aurantimonas	Azospirillum	Bacillus	Bacterio	Bacteroides	Bdellovibrio	Brevibacillus	Brochothrix	Brucella	Burkholderia	Campylobacter	Caulobacter	Celeribacter	Cellulophaga	Citrobacter	Clavibacter	Clostridium	Colwellia	Corynebacterium	Croceibacter	Cronobacter	Cyano	Deftia	Delftia	Dinoroseobacter	Edwardsiella	Enterobacter	Enterobacteria	Enterobacterial	Enterococcus	Erwinia	Erysipelothrix	Escherichia	Flavobacterium	Geobacillus
Ves75	75	Vesicle	(22° 45'N, 158° 00'W)	HOT297	11572006	15	1156	0	489	0	0	0	2	0	1	10	1178	4	0	4	0	1	0	67	13	1290	1671	3042	93	8	98	0	0	146	12055	100601	27	212	6	7	136	705	0	51	29	3	3418	604	11
Ves125	125	Vesicle	(22° 45'N, 158° 00'W)	HOT297	14761244	19	532	0	141	0	0	0	0	0	1	9	448	16	0	1	2	0	0	6	0	461	487	1116	54	0	285	0	0	74	3585	50958	80	76	0	3	45	695	0	30	24	10	1544	142	3
Ves500	500	Vesicle	(22° 45'N, 158° 00'W)	HOT297	15626899	22	541	0	355	0	0	0	0	10	4	3	1025	9	0	12	40	7	0	17	0	1055	899	5458	352	2	183	7	0	136	2735	31513	107	49	19	13	151	386	0	62	235	4	1449	278	6
Vir75	75	Virus	(22° 45'N, 158° 00'W)	HOT297	11270834	132	1835	0	972	0	5	3	8	4	0	27	5901	8	1	15	5	133	5	264	0	4410	6832	64804	567	59	453	6	0	697	6334	391473	162	344	73	95	953	1642	0	61	275	13	2512	1673	15
Vir100	100	Virus	(22° 17'N, 157° 01'W)	FK180310	10706420	98	1525	0	667	1	9	0	0	14	14	32	3769	87	1	6	7	9	3	34	0	2138	3973	54457	483	3	832	1	0	786	3433	404512	110	309	107	62	425	1481	1	66	133	16	2543	3039	33
Vir125	125	Virus	(22° 45'N, 158° 00'W)	HOT297	11361907	133	1304	0	645	0	1	0	0	27	12	37	5414	185	0	12	14	36	0	51	0	2722	4707	50543	762	46	759	0	0	753	3269	419934	172	313	53	72	368	1743	0	50	177	28	1694	1843	35
Vir250	250	Virus	(22° 17'N, 157° 01'W)	FK180310	11897526	94	1662	7	691	25	5	7	11	22	0	58	2815	26	3	52	37	12	0	35	0	3078	6389	59348	1214	6	946	1	0	950	2821	76826	103	211	32	57	343	1500	2	240	299	36	2717	1330	6
Vir500	500	Virus	(22° 45'N, 158° 00'W)	HOT297	14586904	240	1947	6	1112	1	9	0	3	112	2	36	6030	36	5	97	80	13	1	91	0	3865	4197	62237	779	22	675	1	0	1031	5786	87910	216	186	112	125	428	1615	0	326	844	84	3877	809	24
FDNA75	75	FDNA	(22° 45'N, 158° 00'W)	HOT297	8974814	82	2352	0	1466	0	0	4	2	4	0	20	6024	1	0	14	3	28	8	152	1	6589	2997	13550	307	5	117	3	0	388	9434	223601	290	174	0	201	547	2302	0	40	347	4	2111	104	4
FDNA100	100	FDNA	(22° 17'N, 157° 01'W)	FK180310	5077375	50	1297	0	947	0	0	5	1	2	1	12	3216	1	3	10	0	3	0	14	2	2724	2272	11121	199	0	123	0	0	516	3281	229380	203	119	3	112	214	1601	0	7	98	1	835	215	1
FDNA125	125	FDNA	(22° 45'N, 158° 00'W)	HOT297	10182039	31	699	1	703	0	0	8	1	4	5	11	2969	43	0	5	0	6	0	22	0	3801	949	6632	169	3	162	5	0	248	3573	118070	497	65	11	36	120	1019	0	12	339	3	995	135	7
FDNA250	250	FDNA	(22° 17'N, 157° 01'W)	FK180310	8071135	41	338	1	413	1	0	5	3	8	0	12	752	8	0	3	1	2	0	19	0	2057	895	2852	160	10	84	1	0	135	2082	32369	154	36	9	25	76	284	0	10	172	0	738	56	6
FDNA500	500	FDNA	(22° 45'N, 158° 00'W)	HOT297	11522196	39	1621	1	1242	0	1	12	0	5	0	4	1302	1	0	6	6	1	1	117	0	13952	813	4941	137	3	47	7	0	72	23513	122675	961	20	28	60	92	2206	0	22	2549	4	4167	52	7
FDNA1000	1000	FDNA	(22° 45'N, 158° 00'W)	HOT302	9571240	35	239	3	359	0	0	3	0	1	0	1	514	3	0	3	1	0	0	8	0	2058	168	1133	61	4	29	6	0	34	1071	15757	237	15	21	6	39	179	0	13	221	0	361	21	1
[truncated: 77 more columns]

## Sheet: MajorPhageHostDDNA
Sample Name	Sample Collection Depth (m)	Dissolved DNA Type	Sample Location	Cruise Number	Cellulophaga	Cyano	Pelagibacter	Prochlorococcus	Puniceispirillum	Rhodothermus	Synechococcus	Vibrio
Ves75	75	Vesicle	(22° 45'N, 158° 00'W)	HOT297	3042	100601	259903	93231	49098	1925	111650	11221
Ves125	125	Vesicle	(22° 45'N, 158° 00'W)	HOT297	1116	50958	103553	60946	45339	684	109011	8113
Ves500	500	Vesicle	(22° 45'N, 158° 00'W)	HOT297	5458	31513	84619	72725	30047	1959	84006	11589
Vir75	75	Virus	(22° 45'N, 158° 00'W)	HOT297	64804	391473	284035	766742	219640	16836	831303	33477
Vir100	100	Virus	(22° 17'N, 157° 01'W)	FK180310	54457	404512	258591	569819	164498	8218	800610	34333
Vir125	125	Virus	(22° 45'N, 158° 00'W)	HOT297	50543	419934	217996	527406	161813	14662	829943	31294
Vir250	250	Virus	(22° 17'N, 157° 01'W)	FK180310	59348	76826	284441	57964	175170	6335	123507	48235
Vir500	500	Virus	(22° 45'N, 158° 00'W)	HOT297	62237	87910	259162	104861	122763	14615	171416	41508
FDNA75	75	FDNA	(22° 45'N, 158° 00'W)	HOT297	13550	223601	351651	972772	210952	18354	1028904	17419
FDNA100	100	FDNA	(22° 17'N, 157° 01'W)	FK180310	11121	229380	186637	813477	174990	8287	1026417	17677
FDNA125	125	FDNA	(22° 45'N, 158° 00'W)	HOT297	6632	118070	164492	424159	52853	7920	623570	10948
FDNA250	250	FDNA	(22° 17'N, 157° 01'W)	FK180310	2852	32369	71156	115309	29537	2206	142459	9175
FDNA500	500	FDNA	(22° 45'N, 158° 00'W)	HOT297	4941	122675	332882	710975	46410	2946	749837	12689
FDNA1000	1000	FDNA	(22° 45'N, 158° 00'W)	HOT302	1133	15757	56763	46265	8926	1692	66034	2691
