# Supplementary material for: Microbial sources of exocellular DNA in the ocean
Source: Research Square preprint supplement (doi:10.21203/rs.3.rs-431074/v1), 2021-05-05
Supplement: Supplementary file 3 [file ed0d7a1aba1c4b45f6f6224c.xlsx]

## Sheet: Summary
Dataset S2	Data used in main text (as proportions). Includes major bacterial and viral families (cutoff: major family contributes ≥65% of all DDNA samples) contributing to dissolved metagenomic DNA (vesicles, viruses, and free DNA/FDNA) gene counts
Sheet1:DDNAAnnotationSums
Column Descriptions
Sample Name	Sample Name
Sample Collection Depth	Depth (m)
Dissolved DNA Type	(Vesicle, Viral, FDNA)
Sample Location	Coordinates sample was collected from
Cruise Number	HOT297, HOT302, or FK180310
Total >cutoff Family Counts ("MajorClades")	Sum of family-level annotated gene counts above or equal to cutoff
Total Family-level Counts (> and < cutoff)	Sum of all family-level annotated gene counts above and below the designated cutoff
Non-major Families (<cutoff)	Sum of family-level annotated gene counts below the cutoff
Total Gene Counts	Total gene counts
Unannotated (Family-level)	Unassigned (family-level) gene counts
Sheet2: DDNAMajorClades
Column Descriptions
Sample Name	Sample Name
Sample Collection Depth	Depth (m)
Dissolved DNA Type	(Vesicle, Viral, FDNA)
Sample Location	Coordinates sample was collected from
Columns D-R	Family name

## Sheet: DDNAAnnotationSums
Sample Name	Sample Collection Depth (m)	Dissolved DNA Type	Sample Location	Cruise Number	Total >cutoff Family Counts ("MajorClades")	Total Family-level Counts (> and < cutoff)	Non-major Families (<cutoff)	Total Gene Counts	Unannotated (Family-level)
Ves75	75	Vesicle	(22° 45'N, 158° 00'W)	HOT297	4934059	6657660	1723601	12747332	6089672
Ves125	125	Vesicle	(22° 45'N, 158° 00'W)	HOT297	9514482	11550100	2035618	15397229	3847129
Ves500	500	Vesicle	(22° 45'N, 158° 00'W)	HOT297	7186761	11152500	3965739	16694964	5542464
Vir75	75	Virus	(22° 45'N, 158° 00'W)	HOT297	3370988	5420090	2049102	14362092	8942002
Vir100	100	Virus	(22° 17'N, 157° 01'W)	FK180310	3253102	5031730	1778628	13363478	8331748
Vir125	125	Virus	(22° 45'N, 158° 00'W)	HOT297	3001697	4942910	1941213	14031653	9088743
Vir250	250	Virus	(22° 17'N, 157° 01'W)	FK180310	1940939	3645800	1704861	13206072	9560272
Vir500	500	Virus	(22° 45'N, 158° 00'W)	HOT297	2103773	4223860	2120087	16163098	11939238
FDNA75	75	FDNA	(22° 45'N, 158° 00'W)	HOT297	5125946	6651250	1525304	12427745	5776495
FDNA100	100	FDNA	(22° 17'N, 157° 01'W)	FK180310	3011342	3862660	851318	7737206	3874546
FDNA125	125	FDNA	(22° 45'N, 158° 00'W)	HOT297	4848705	6976200	2127495	14886720	7910520
FDNA250	250	FDNA	(22° 17'N, 157° 01'W)	FK180310	2945787	5337180	2391393	10650078	5312898
FDNA500	500	FDNA	(22° 45'N, 158° 00'W)	HOT297	6691233	9109520	2418287	14638768	5529248
FDNA1000	1000	FDNA	(22° 45'N, 158° 00'W)	HOT302	3342474	6138520	2796046	14653482	8514962

## Sheet: DDNAMajorClades
Sample Name	Sample Collection Depth (m)	Dissolved DNA Type (Vesicle, Viral, FDNA)	Alteromonadaceae	Bacillaceae	Flavobacteriaceae	Myoviridae	Pelagibacteraceae	Podoviridae	Polyangiaceae	Prochloraceae	Rhizobiaceae	Rhodobacteraceae	Rhodospirillaceae	Salinisphaeraceae	Siphoviridae	Vibrionaceae	Verrucomicrobia
Ves75	75	Vesicle	12887	38508	48904	273765	3655081	343984	40131	43731	55467	106335	125562	48422	54167	69511	17604
Ves125	125	Vesicle	13670	53679	59662	204888	8480164	181700	28998	25629	45278	122837	166692	31435	39735	44811	15304
Ves500	500	Vesicle	51744	70580	92061	210132	5628790	114476	31100	29810	63468	344575	318659	40090	46229	57712	87335
Vir75	75	Virus	11788	41122	102654	1298251	172871	1023194	38137	26690	81474	108129	70790	76180	173677	103733	42298
Vir100	100	Virus	185674	35979	86952	1159988	80190	940400	65209	27159	77834	117626	64499	91198	168443	106962	44989
Vir125	125	Virus	10715	50330	95446	1098045	112395	992342	21434	31689	71407	103635	73632	68805	149500	75083	47239
Vir250	250	Virus	50443	46221	86079	349325	92830	525882	58534	9238	76675	147415	68001	117471	135280	111374	66171
Vir500	500	Virus	19328	60066	105232	499082	166710	417585	30643	12159	88779	166376	67072	118959	157533	113484	80765
FDNA75	75	FDNA	13053	31903	71705	2290017	1825412	415448	55982	99306	30627	57596	50921	12686	117719	32260	21311
FDNA100	100	FDNA	60170	19154	49677	1931586	48871	438453	217544	35708	20867	32117	24880	11598	81346	22446	16925
FDNA125	125	FDNA	45957	46367	125164	1122346	928224	202474	45059	2054319	23705	73569	54588	10809	72448	25667	18009
FDNA250	250	FDNA	169756	37963	157518	318436	1313766	78346	125521	339095	23072	163132	89895	17547	27338	65044	19358
FDNA500	500	FDNA	126938	32657	301707	1800018	939483	128536	68355	2771195	27318	162950	81685	8917	121894	34552	85028
FDNA1000	1000	FDNA	46577	40953	212401	177872	749906	23272	49824	1755530	19110	118423	85873	5075	12703	25978	18977
