# Supplementary material for: Microbial sources of exocellular DNA in the ocean
Source: Research Square preprint supplement (doi:10.21203/rs.3.rs-431074/v1), 2021-05-05
Supplement: Supplementary file 4 [file ed4bd78e0f966260ec6c9dea.xlsx]

## Sheet: Summary
Dataset S1	All family-level annotated taxon counts for all dissolved metagenomic DNA (vesicles, viruses, and free DNA/FDNA) samples
Sheet1:Vesicles
Column Descriptions
Family	Family name
Domain	Domain name
HOT297_75m	Vesicle sample collected from HOT297 cruise from 75 m (22° 45'N, 158° 00'W)
HOT297_125m	Vesicle sample collected from HOT297 cruise from 125 m (22° 45'N, 158° 00'W)
HOT297_500m	Vesicle sample collected from HOT297 cruise from 500 m (22° 45'N, 158° 00'W)
Sheet2:Viruses
Column Descriptions
Family	Family name
Domain	Domain name
HOT297_75m	Virus sample collected from HOT297 cruise from 75 m (22° 45'N, 158° 00'W)
Falkor_100m	Virus sample collected from FK180310 cruise from 100 m (22° 17'N, 157° 01'W)
HOT297_125m	Virus sample collected from HOT297 cruise from 125 m (22° 45'N, 158° 00'W)
Falkor_250m	Virus sample collected from FK180310 cruise from 250 m (22° 17'N, 157° 01'W)
HOT297_500m	Virus sample collected from HOT297 cruise from 500 m (22° 45'N, 158° 00'W)
Sheet3:Free DNA
Column Descriptions
Family	Family name
Domain	Domain name
HOT297_75m	Free DNA sample collected from HOT297 cruise from 75 m (22° 45'N, 158° 00'W)
Falkor_100m	Free DNA sample collected from FK180310 cruise from 100 m (22° 17'N, 157° 01'W)
HOT297_125m	Free DNA sample collected from HOT297 cruise from 125 m (22° 45'N, 158° 00'W)
Falkor_250m	Free DNA sample collected from FK180310 cruise from 250 m (22° 17'N, 157° 01'W)
HOT297_500m	Free DNA sample collected from HOT297 cruise from 500 m (22° 45'N, 158° 00'W)
HOT302_1000m	Free DNA sample collected from HOT302 cruise from 1000 m (22° 45'N, 158° 00'W)

## Sheet: Vesicles
Family	Domain	HOT297_75m	HOT297_125m	HOT297_500m
Abalone shriveling syndrome-associated virus	Viruses	1	2	3
Acanthamoebidae	Eukaryota	340	527	1536
Acanthasteridae	Eukaryota	54	80	170
Acanthisittidae	Eukaryota	1	1	0
Acanthogorgiidae	Eukaryota	0	0	0
Acaryochloridaceae	Bacteria <prokaryotes>	194	169	338
Accipitridae	Eukaryota	0	2	5
Acerentomidae	Eukaryota	0	0	0
Acetobacteraceae	Bacteria <prokaryotes>	12710	13107	25777
Acholeplasmataceae	Bacteria <prokaryotes>	1033	1077	1336
Acidaminococcaceae	Bacteria <prokaryotes>	464	490	1157
Acidibacillus	Bacteria <prokaryotes>	141	133	443
Acidiferrobacteraceae	Bacteria <prokaryotes>	181	134	505
Acidilobaceae	Archaea	5	6	18
Acidimicrobiaceae	Bacteria <prokaryotes>	29210	53489	71637
Acidithiobacillaceae	Bacteria <prokaryotes>	410	542	623
Acidobacteriaceae	Bacteria <prokaryotes>	3661	5402	7565
Acidothermaceae	Bacteria <prokaryotes>	222	470	873
Aciduliprofundum	Archaea	1253	1778	2943
Acinetosporaceae	Eukaryota	0	0	0
Acroporidae	Eukaryota	300	77	122
Actiniidae	Eukaryota	0	0	0
Actinobacteria bacterium IMCC19121	Bacteria <prokaryotes>	117	148	341
Actinobacteria bacterium IMCC25003	Bacteria <prokaryotes>	34	107	119
Actinobacteria bacterium IMCC26077	Bacteria <prokaryotes>	876	1836	2419
Actinobacteria bacterium IMCC26103	Bacteria <prokaryotes>	491	609	886
Actinomycetaceae	Bacteria <prokaryotes>	2577	4428	6482
Actinopolysporaceae	Bacteria <prokaryotes>	405	850	1901
Actinospicaceae	Bacteria <prokaryotes>	86	113	216
Acytostelium	Eukaryota	73	116	171
Adenoviridae	Viruses	1	1	8
Adrianichthyidae	Eukaryota	7	9	16
Aerococcaceae	Bacteria <prokaryotes>	717	1062	1328
Aeromonadaceae	Bacteria <prokaryotes>	2110	2552	3937
Aeropyrum pernix spindle-shaped virus 1	Viruses	0	0	1
Agamidae	Eukaryota	5	13	8
Agaonidae	Eukaryota	6	29	42
Agaraceae	Eukaryota	0	0	0
Agaricaceae	Eukaryota	10	8	24
Ahnfeltiaceae	Eukaryota	0	0	0
Aiptasiidae	Eukaryota	2378	2334	441
Ajellomycetaceae	Eukaryota	2	3	3
Akkermansiaceae	Bacteria <prokaryotes>	188	233	259
Alariaceae	Eukaryota	0	0	0
Alcaligenaceae	Bacteria <prokaryotes>	10651	9359	16035
Alcanivoracaceae	Bacteria <prokaryotes>	2701	2600	10316
Alcyoniidae	Eukaryota	0	7	1
Aleyrodidae	Eukaryota	35	56	87
Algiphilaceae	Bacteria <prokaryotes>	331	633	627
Alicyclobacillaceae	Bacteria <prokaryotes>	2050	3071	3546
Alkalimonas	Bacteria <prokaryotes>	91	154	106
Alligatoridae	Eukaryota	4	5	6
Alloherpesviridae	Viruses	0	0	1
Alteromonadaceae	Bacteria <prokaryotes>	12887	13670	51744
Amborellaceae	Eukaryota	23	27	59
Amoebophilaceae	Bacteria <prokaryotes>	51	73	84
Amphibolidae	Eukaryota	0	0	0
Anaerocellum group	Bacteria <prokaryotes>	45	46	146
Anaerolineaceae	Bacteria <prokaryotes>	5066	8799	15193
Anaeromyxobacteraceae	Bacteria <prokaryotes>	703	916	600
Anaerovirgula	Bacteria <prokaryotes>	79	114	294
Anaplasmataceae	Bacteria <prokaryotes>	5904	8590	17062
Anatidae	Eukaryota	3	3	2
Ancylostomatidae	Eukaryota	61	30	62
Andalucia	Eukaryota	9	10	15
Andrognathidae	Eukaryota	0	0	0
Aneuraceae	Eukaryota	0	0	0
Anisakidae	Eukaryota	0	0	0
Aotidae	Eukaryota	0	0	0
Aphalaridae	Eukaryota	0	0	0
Aphanizomenonaceae	Bacteria <prokaryotes>	947	1982	1467
Aphanothecaceae	Bacteria <prokaryotes>	1552	2082	2517
Aphididae	Eukaryota	91	85	232
Apiaceae	Eukaryota	109	55	150
Apidae	Eukaryota	295	478	627
Apis mellifera filamentous virus	Viruses	0	0	0
Aplysiidae	Eukaryota	87	60	89
Aplysinidae	Eukaryota	0	0	0
Apodidae	Eukaryota	0	3	0
Apterygidae	Eukaryota	0	1	3
Apusomonadidae	Eukaryota	116	62	107
Aquificaceae	Bacteria <prokaryotes>	4294	4453	4768
Archaeoglobaceae	Archaea	4810	5188	5175
Archangiaceae	Bacteria <prokaryotes>	1125	1622	3317
Ardeidae	Eukaryota	3	0	1
Ardenticatenaceae	Bacteria <prokaryotes>	2404	4436	10265
Arecaceae	Eukaryota	88	209	406
Armatimonadetes bacterium DC	Bacteria <prokaryotes>	21	33	118
Armatimonadetes bacterium GBS	Bacteria <prokaryotes>	0	1	5
Armatimonadetes bacterium GXS	Bacteria <prokaryotes>	77	162	17
Arthrodermataceae	Eukaryota	3	27	21
Ascoideaceae	Eukaryota	15	16	25
Ascoviridae	Viruses	16	12	31
Asfarviridae	Viruses	1	2	24
Asparagaceae	Eukaryota	30	80	73
Aspergillaceae	Eukaryota	41	107	113
Asteraceae	Eukaryota	36	48	62
Athyriaceae	Eukaryota	0	0	0
Atopobiaceae	Bacteria <prokaryotes>	737	744	832
Atribacteria bacterium JGI 0000014-F07	Bacteria <prokaryotes>	348	482	1111
Aulacidae	Eukaryota	0	0	0
Aurantimonadaceae	Bacteria <prokaryotes>	6252	8407	13283
Aureococcus	Eukaryota	873	437	1032
Aureoumbra	Eukaryota	16	3	26
Auriculariaceae	Eukaryota	27	66	33
Azonexaceae	Bacteria <prokaryotes>	754	753	818
Babesiidae	Eukaryota	170	55	118
Bacillaceae	Bacteria <prokaryotes>	38508	53679	70580
Bacillales Family X. Incertae Sedis	Bacteria <prokaryotes>	116	62	127
Bacillales Family XI. Incertae Sedis	Bacteria <prokaryotes>	747	1568	891
Bacillales Family XII. Incertae Sedis	Bacteria <prokaryotes>	524	902	1224
Bacillariaceae	Eukaryota	0	0	2
Bacillus phage BalMu-1	Viruses	0	0	0
Bacteriovoracaceae	Bacteria <prokaryotes>	1445	2245	3674
Bacteroidaceae	Bacteria <prokaryotes>	3027	3791	3895
Baculoviridae	Viruses	10	10	26
Balaenopteridae	Eukaryota	0	1	4
Balneolaceae	Bacteria <prokaryotes>	2967	6064	9106
Bangiaceae	Eukaryota	23	28	5
Barnesiellaceae	Bacteria <prokaryotes>	32	48	68
Bartonellaceae	Bacteria <prokaryotes>	9260	5387	9186
Bathycoccaceae	Eukaryota	905	2058	2056
Bathyergidae	Eukaryota	6	5	13
Batrachochytrium	Eukaryota	41	43	71
Batrachospermaceae	Eukaryota	3	0	2
Bauldia	Bacteria <prokaryotes>	953	1436	4238
Bdellovibrionaceae	Bacteria <prokaryotes>	11221	5229	6210
Beihai weivirus-like virus 4	Viruses	0	0	0
Beijerinckiaceae	Bacteria <prokaryotes>	1690	2615	4815
Berkeleyaceae	Eukaryota	0	0	0
Bernardetiaceae	Bacteria <prokaryotes>	693	1082	2046
Beutenbergiaceae	Bacteria <prokaryotes>	28	18	68
Bicaudaviridae	Viruses	0	0	0
Bifidobacteriaceae	Bacteria <prokaryotes>	647	953	1435
Bifurcata	Eukaryota	0	0	0
Bigelowiella	Eukaryota	3	5	1
Blastocladiaceae	Eukaryota	0	0	0
Blastocystis	Eukaryota	229	472	337
Blattabacteriaceae	Bacteria <prokaryotes>	265	210	245
Boldiaceae	Eukaryota	2	6	8
Bolinopsidae	Eukaryota	0	0	1
Bombycidae	Eukaryota	18	12	30
Bondarzewiaceae	Eukaryota	0	4	5
Bonnemaisoniaceae	Eukaryota	0	0	0
Borreliaceae	Bacteria <prokaryotes>	1238	1598	2802
Bostrichidae	Eukaryota	0	0	0
Botryococcaceae	Eukaryota	0	0	0
Botryosphaeriaceae	Eukaryota	16	8	15
Bovidae	Eukaryota	292	421	1282
Brachyspiraceae	Bacteria <prokaryotes>	1023	1345	1101
Braconidae	Eukaryota	81	102	147
Bracteacoccaceae	Eukaryota	0	0	0
Bradyrhizobiaceae	Bacteria <prokaryotes>	33900	32084	51442
Branchiostomidae	Eukaryota	226	240	764
Brassicaceae	Eukaryota	228	262	456
Brevibacteriaceae	Bacteria <prokaryotes>	678	815	1200
Brevinemataceae	Bacteria <prokaryotes>	91	87	316
Bromeliaceae	Eukaryota	8	6	31
Brucella phage BiPBO1	Viruses	0	0	0
Brucellaceae	Bacteria <prokaryotes>	3504	2694	6318
Bryobacteraceae	Bacteria <prokaryotes>	108	136	243
Bryopsidaceae	Eukaryota	4	1	16
Bucerotidae	Eukaryota	4	0	4
Budviciaceae	Bacteria <prokaryotes>	45	47	108
Buprestidae	Eukaryota	97	108	379
Burkholderiaceae	Bacteria <prokaryotes>	30493	22404	35208
Burkholderiales Genera incertae sedis	Bacteria <prokaryotes>	1727	1502	4986
Caedibacter	Bacteria <prokaryotes>	4412	3193	5347
Caenogastropoda	Eukaryota	0	0	0
Calanidae	Eukaryota	0	0	0
Caldicoprobacteraceae	Bacteria <prokaryotes>	430	426	251
Caldilineaceae	Bacteria <prokaryotes>	832	1191	4134
Caldisericaceae	Bacteria <prokaryotes>	700	931	1754
Caldisphaeraceae	Archaea	17	37	54
Calditrichaceae	Bacteria <prokaryotes>	1986	3472	4614
Callorhinchidae	Eukaryota	50	75	34
Callyspongiidae	Eukaryota	0	0	0
Cambaridae	Eukaryota	0	0	0
Camelidae	Eukaryota	8	7	4
Campanulaceae	Eukaryota	7	3	1
Campanulariidae	Eukaryota	0	0	0
Campylobacteraceae	Bacteria <prokaryotes>	13177	17185	20822
Candidatus Accumulibacter	Bacteria <prokaryotes>	33	67	148
Candidatus Azobacteroides	Bacteria <prokaryotes>	40	43	112
Candidatus Babela	Bacteria <prokaryotes>	28	34	57
Candidatus Baumannia	Bacteria <prokaryotes>	25	41	88
Candidatus Brocadiaceae	Bacteria <prokaryotes>	2834	3724	3996
Candidatus Chrysopegis	Bacteria <prokaryotes>	482	862	2043
Candidatus Cloacimonas	Bacteria <prokaryotes>	143	155	315
Candidatus Desulfofervidaceae	Bacteria <prokaryotes>	748	846	1733
Candidatus Entotheonella	Bacteria <prokaryotes>	3008	4586	7699
Candidatus Hepatobacter	Bacteria <prokaryotes>	116	136	293
Candidatus Izimaplasma	Bacteria <prokaryotes>	47	100	72
Candidatus Korarchaeum	Archaea	72	122	138
Candidatus Kryptobacter	Bacteria <prokaryotes>	878	1191	2066
Candidatus Kryptonium	Bacteria <prokaryotes>	1088	2015	2312
Candidatus Methanoperedenaceae	Archaea	976	306	461
Candidatus Micrarchaeota archaeon Mia14	Archaea	45	52	78
Candidatus Midichloriaceae	Bacteria <prokaryotes>	1461	2688	5089
Candidatus Nanopelagicus	Bacteria <prokaryotes>	2021	3196	4576
Candidatus Nasuia	Bacteria <prokaryotes>	0	0	4
Candidatus Nitrosopelagicus	Archaea	1252	90571	190515
Candidatus Nitrosotenuis	Archaea	372	3224	73764
Candidatus Nucleicultrix	Bacteria <prokaryotes>	1830	3585	5082
Candidatus Paracaedibacteraceae	Bacteria <prokaryotes>	3266	5119	9647
Candidatus Planktophila	Bacteria <prokaryotes>	2145	4112	5007
Candidatus Profftella	Bacteria <prokaryotes>	16	19	9
Candidatus Ruthia	Bacteria <prokaryotes>	289	369	473
Candidatus Saccharibacteria oral taxon TM7x	Bacteria <prokaryotes>	69	44	337
Candidatus Sulcia	Bacteria <prokaryotes>	19	40	34
Candidatus Symbiothrix	Bacteria <prokaryotes>	6	13	30
Candidatus Thiodiazotropha	Bacteria <prokaryotes>	3085	4055	4517
Candidatus Thioglobus	Bacteria <prokaryotes>	8393	14867	34694
Candidatus Tremblaya	Bacteria <prokaryotes>	0	0	0
Candidatus Walczuchella	Bacteria <prokaryotes>	127	51	149
Candidatus Xiphinematobacter	Bacteria <prokaryotes>	6	15	55
Canidae	Eukaryota	1	1	3
Caprimulgidae	Eukaryota	6	0	0
Capsaspora	Eukaryota	68	81	108
Cardiobacteriaceae	Bacteria <prokaryotes>	395	264	445
Cariamidae	Eukaryota	2	2	0
Caricaceae	Eukaryota	32	22	34
Carnobacteriaceae	Bacteria <prokaryotes>	1136	1386	3765
Carteria	Eukaryota	0	0	0
Caryophyllaceae	Eukaryota	1	0	83
Caryophylliidae	Eukaryota	0	0	0
Castoridae	Eukaryota	1	4	1
Catabacteriaceae	Bacteria <prokaryotes>	42	115	86
Catalimonadaceae	Bacteria <prokaryotes>	275	255	308
Catenulisporaceae	Bacteria <prokaryotes>	82	69	486
Caulerpaceae	Eukaryota	3	3	4
Caulobacteraceae	Bacteria <prokaryotes>	9365	8952	13453
Caviidae	Eukaryota	2	0	2
Cebidae	Eukaryota	12	18	46
Cecidomyiidae	Eukaryota	0	0	0
Cellulomonadaceae	Bacteria <prokaryotes>	1283	2077	1717
Cellulophaga phage phi48:2	Viruses	0	1	1
Cellvibrionaceae	Bacteria <prokaryotes>	6681	4917	10110
Centropomidae	Eukaryota	9	4	22
Cephidae	Eukaryota	15	7	17
Cerambycidae	Eukaryota	252	45	36
Ceramiaceae	Eukaryota	0	8	12
Cercopithecidae	Eukaryota	9	7	10
Cervidae	Eukaryota	0	0	0
Chaetocerotaceae	Eukaryota	0	0	1
Chaetomiaceae	Eukaryota	27	33	75
Chaetopeltidaceae	Eukaryota	0	0	0
Chaetosphaeridiaceae	Eukaryota	0	0	0
Chamaesiphonaceae	Bacteria <prokaryotes>	101	81	127
Chamaetrichon	Eukaryota	0	0	0
Champiaceae	Eukaryota	0	0	0
Characeae	Eukaryota	0	1	0
Characidae	Eukaryota	41	20	27
Charadriidae	Eukaryota	0	0	0
Chattonellaceae	Eukaryota	0	2	4
Cheirogaleidae	Eukaryota	1	1	4
Chelatococcaceae	Bacteria <prokaryotes>	1580	1006	2450
Cheloniidae	Eukaryota	23	5	4
Chenopodiaceae	Eukaryota	115	205	204
Chinchillidae	Eukaryota	0	1	1
Chironomidae	Eukaryota	0	0	0
Chitinivibrionaceae	Bacteria <prokaryotes>	518	671	80
Chitinophagaceae	Bacteria <prokaryotes>	5128	6078	7953
Chlamydiaceae	Bacteria <prokaryotes>	203	351	898
Chlamydomonadaceae	Eukaryota	126	56	114
Chloracidobacterium	Bacteria <prokaryotes>	169	286	306
Chlorellaceae	Eukaryota	371	579	793
Chlorobiaceae	Bacteria <prokaryotes>	3279	5491	5725
Chlorodendraceae	Eukaryota	0	0	0
Chloroflexaceae	Bacteria <prokaryotes>	816	1314	2434
Chlorogloeopsidaceae	Bacteria <prokaryotes>	227	157	170
Chlorokybaceae	Eukaryota	1	4	1
Chondrillidae	Eukaryota	0	0	0
Chordariaceae	Eukaryota	0	0	0
Choreocolacaceae	Eukaryota	0	0	0
Christensenellaceae	Bacteria <prokaryotes>	65	90	145
Chromatiaceae	Bacteria <prokaryotes>	6542	9013	11474
Chromobacteriaceae	Bacteria <prokaryotes>	3082	3198	5211
Chromochloridaceae	Eukaryota	0	0	0
Chromulinaceae	Eukaryota	0	1	7
Chroococcaceae	Bacteria <prokaryotes>	1430	1285	1920
Chroococcidiopsidaceae	Bacteria <prokaryotes>	534	795	280
Chroomonadaceae	Eukaryota	2	0	11
Chryseolinea	Bacteria <prokaryotes>	443	633	809
Chrysiogenaceae	Bacteria <prokaryotes>	210	393	397
Chrysobalanaceae	Eukaryota	0	0	0
Chrysochloridae	Eukaryota	5	7	8
Chrysopidae	Eukaryota	0	0	0
Chthoniobacteraceae	Bacteria <prokaryotes>	835	846	1323
Chthonomonadaceae	Bacteria <prokaryotes>	466	1080	1503
Cicadellidae	Eukaryota	1	0	0
Cichlidae	Eukaryota	13	22	81
Cimicidae	Eukaryota	63	46	51
Cionidae	Eukaryota	68	306	112
Circoviridae	Viruses	43	1	0
Circovirus-like genome RW-C	Viruses	4	0	0
Circovirus-like genome SAR-A	Viruses	20	0	0
Clavicipitaceae	Eukaryota	15	26	16
Cleomaceae	Eukaryota	32	26	29
Closteriaceae	Eukaryota	1	0	5
Clostridiaceae	Bacteria <prokaryotes>	35781	48078	60656
Clostridiales Family XII. Incertae Sedis	Bacteria <prokaryotes>	387	690	952
Clostridiales Family XIII. Incertae Sedis	Bacteria <prokaryotes>	523	362	1095
Clostridiales Family XVI. Incertae Sedis	Bacteria <prokaryotes>	1641	534	326
Clostridiales Family XVII. Incertae Sedis	Bacteria <prokaryotes>	1998	2792	2890
Clostridium phage phiCT19406C	Viruses	0	0	11
Clostridium phage phiCT453A	Viruses	1	0	0
Clostridium phage phiCTC2A	Viruses	8	32	0
Clupeidae	Eukaryota	14	16	22
Coccidioides	Eukaryota	28	76	40
Coccomyxaceae	Eukaryota	206	258	158
Coelacanthidae	Eukaryota	118	50	167
Cohaesibacteraceae	Bacteria <prokaryotes>	1990	1575	3333
Coleochaetaceae	Eukaryota	0	0	0
Coleofasciculaceae	Bacteria <prokaryotes>	578	842	1218
Coliidae	Eukaryota	1	0	1
Colletidae	Eukaryota	0	0	0
Collodictyonidae	Eukaryota	1	0	4
Colubridae	Eukaryota	6	17	22
Columbidae	Eukaryota	1	2	0
Colwelliaceae	Bacteria <prokaryotes>	3055	3136	4484
Comamonadaceae	Bacteria <prokaryotes>	13758	10569	17665
Competibacteraceae	Bacteria <prokaryotes>	908	1506	1981
Compsopogonaceae	Eukaryota	3	3	7
Conexibacteraceae	Bacteria <prokaryotes>	1069	1793	3039
Conidae	Eukaryota	0	0	0
Coniophoraceae	Eukaryota	20	12	15
Coniosporium <Dothideomycetes incertae sedis>	Eukaryota	8	28	7
Convolvulaceae	Eukaryota	10	30	32
Corallinaceae	Eukaryota	0	0	0
Cordycipitaceae	Eukaryota	36	32	4
Coriobacteriaceae	Bacteria <prokaryotes>	352	250	553
Corvidae	Eukaryota	55	94	2
Corydalidae	Eukaryota	0	0	0
Corynebacteriaceae	Bacteria <prokaryotes>	4913	7689	9214
Coscinodiscaceae	Eukaryota	1	0	0
Coxiellaceae	Bacteria <prokaryotes>	4799	5243	12820
Crambidae	Eukaryota	0	0	0
Crenotrichaceae	Bacteria <prokaryotes>	969	1365	2218
Criblamydiaceae	Bacteria <prokaryotes>	183	180	303
Cricetidae	Eukaryota	7	3	7
Crocinitomicaceae	Bacteria <prokaryotes>	568	635	1087
Crocodylidae <all crocodiles>	Eukaryota	5	3	3
Cryomorphaceae	Bacteria <prokaryotes>	1017	328	1103
Cryptococcaceae	Eukaryota	188	77	276
Cryptomonadaceae	Eukaryota	8	12	15
Cryptosporangiaceae	Bacteria <prokaryotes>	191	289	536
Cryptosporidiidae	Eukaryota	78	48	79
Ctenophore-associated circular virus 4	Viruses	0	0	0
Cuculidae	Eukaryota	0	1	2
Cucurbitaceae	Eukaryota	78	110	130
Culex mononega-like virus 2	Viruses	0	0	0
Culicidae	Eukaryota	89	69	63
Cuniculiplasmataceae	Archaea	168	436	95
Cuniculitremaceae	Eukaryota	9	22	18
Cupressaceae	Eukaryota	0	0	1
Curculionidae	Eukaryota	16	14	47
Cyanidiaceae	Eukaryota	266	343	432
Cyanobacteriaceae	Bacteria <prokaryotes>	638	265	453
Cyanophage KBS-P-1A	Viruses	479	102	113
Cyanophage KBS-S-2A	Viruses	20573	1919	431
Cyanophage MED4-117	Viruses	11878	796	1010
Cyanophage Syn30	Viruses	1548	941	706
Cyanophoraceae	Eukaryota	0	0	1
Cyanoptyche	Eukaryota	0	0	0
Cyanothecaceae	Bacteria <prokaryotes>	1270	1076	1477
Cyclobacteriaceae	Bacteria <prokaryotes>	3060	4209	6386
Cyclopettidae	Eukaryota	0	0	0
Cymbomonas	Eukaryota	0	0	0
Cynocephalidae	Eukaryota	59	21	16
Cynoglossidae	Eukaryota	4	18	19
Cyphellophoraceae	Eukaryota	12	17	2
Cypridinidae	Eukaryota	0	0	0
Cyprinidae	Eukaryota	306	69	59
Cyprinodontidae	Eukaryota	5	2	8
Cytophagaceae	Bacteria <prokaryotes>	7865	8381	9886
Dacryobolaceae	Eukaryota	0	0	0
Dactyloidae	Eukaryota	8	7	6
Daphniidae	Eukaryota	0	0	0
Dasyaceae	Eukaryota	6	15	30
Dasypodidae	Eukaryota	6	3	3
Dasyuridae	Eukaryota	20	19	101
Debaryomycetaceae	Eukaryota	374	802	935
Deep-sea thermophilic phage D6E	Viruses	6	1	3
Deferribacteraceae	Bacteria <prokaryotes>	11857	7570	10652
Deferrisoma	Bacteria <prokaryotes>	531	772	561
Defluviitaleaceae	Bacteria <prokaryotes>	206	366	553
Defluviitoga	Bacteria <prokaryotes>	342	946	1404
Dehalococcoidaceae	Bacteria <prokaryotes>	709	563	3299
Dehalogenimonas	Bacteria <prokaryotes>	227	373	894
Deinococcaceae	Bacteria <prokaryotes>	5512	2733	4390
Delesseriaceae	Eukaryota	1	4	0
Delphacidae	Eukaryota	192	162	784
Delphinidae	Eukaryota	0	0	1
Demequinaceae	Bacteria <prokaryotes>	1462	2893	2137
Demodicidae	Eukaryota	0	0	0
Dermabacteraceae	Bacteria <prokaryotes>	1249	914	1947
Dermacoccaceae	Bacteria <prokaryotes>	360	347	1367
Dermateaceae	Eukaryota	32	7	7
Dermatophilaceae	Bacteria <prokaryotes>	138	166	677
Dermocarpellaceae	Bacteria <prokaryotes>	235	741	166
Desertifilaceae	Bacteria <prokaryotes>	338	595	180
Desmarestiaceae	Eukaryota	0	0	0
Desulfarculaceae	Bacteria <prokaryotes>	940	1422	1829
Desulfobacteraceae	Bacteria <prokaryotes>	17022	14250	13911
Desulfobulbaceae	Bacteria <prokaryotes>	1734	2658	3452
Desulfohalobiaceae	Bacteria <prokaryotes>	1399	2434	3089
Desulfomicrobiaceae	Bacteria <prokaryotes>	434	535	659
Desulfonatronaceae	Bacteria <prokaryotes>	427	820	1224
Desulfovibrionaceae	Bacteria <prokaryotes>	21763	14133	18039
Desulfurellaceae	Bacteria <prokaryotes>	2270	4407	4103
Desulfuribacillus	Bacteria <prokaryotes>	447	944	1291
Desulfurobacteriaceae	Bacteria <prokaryotes>	3788	5519	4260
Desulfurococcaceae	Archaea	75	141	280
Desulfuromonadaceae	Bacteria <prokaryotes>	3560	5215	5738
Dethiosulfatibacter	Bacteria <prokaryotes>	107	135	206
Diatrypaceae	Eukaryota	11	42	21
Dicloster	Eukaryota	0	0	0
Dicroglossidae	Eukaryota	12	16	18
Dictyoglomaceae	Bacteria <prokaryotes>	3158	4810	3508
Dictyostelium	Eukaryota	416	617	1666
Dictyotaceae	Eukaryota	0	0	0
Didelphidae	Eukaryota	7	4	1
Didymosphaeriaceae	Eukaryota	4	2	6
Dietziaceae	Bacteria <prokaryotes>	302	299	385
Dipodascaceae	Eukaryota	22	35	32
Dipodidae	Eukaryota	0	2	2
Diprionidae	Eukaryota	16	9	8
Dissulfuribacter	Bacteria <prokaryotes>	627	1659	928
Ditrysia	Eukaryota	1	1	0
Dixoniellaceae	Eukaryota	0	0	1
Dragonfly cyclicusvirus	Viruses	2	0	0
Dragonfly larvae associated circular virus-10	Viruses	1	0	0
Drosophilidae	Eukaryota	589	887	2270
Dunaliella viridis virus SI2	Viruses	72	66	684
Dunaliellaceae	Eukaryota	0	0	0
Dysgonamonadaceae	Bacteria <prokaryotes>	638	713	771
Ectocarpaceae	Eukaryota	0	0	0
Ectothiorhodospiraceae	Bacteria <prokaryotes>	18135	19844	25315
Edwardsiidae	Eukaryota	290	529	738
Eggerthellaceae	Bacteria <prokaryotes>	1408	2306	3428
Eimeriidae	Eukaryota	32	49	58
Elateridae	Eukaryota	0	0	0
Elephantidae	Eukaryota	1	8	2
Elioraea	Bacteria <prokaryotes>	393	662	2056
Elliptochloris	Eukaryota	0	0	1
Elusimicrobiaceae	Bacteria <prokaryotes>	197	301	336
Embiotocidae	Eukaryota	0	0	0
Embryophyta	Eukaryota	67	77	214
Emydidae	Eukaryota	10	18	70
Encyrtidae	Eukaryota	14	12	50
Endomicrobiaceae	Bacteria <prokaryotes>	528	608	457
Enhydrobacter	Bacteria <prokaryotes>	1335	2399	7001
Entamoebidae	Eukaryota	1055	207	229
Enterobacteriaceae	Bacteria <prokaryotes>	11586	8106	12119
Enterococcaceae	Bacteria <prokaryotes>	2611	2305	3151
Enterocytozoonidae	Eukaryota	34	38	21
Entomoplasmataceae	Bacteria <prokaryotes>	262	767	461
Ephedraceae	Eukaryota	0	1	0
Epulopiscium	Bacteria <prokaryotes>	38	23	38
Equidae	Eukaryota	12	36	3
Equisetaceae	Eukaryota	0	0	0
Eremoneura	Eukaryota	1	2	3
Ergasilidae	Eukaryota	0	0	0
Erinaceidae	Eukaryota	52	131	8
Erwinia phage vB_EamM_Caitlin	Viruses	0	0	1
Erwiniaceae	Bacteria <prokaryotes>	2718	2251	4250
Erysipelotrichaceae	Bacteria <prokaryotes>	2628	3821	5384
Erythrobacteraceae	Bacteria <prokaryotes>	11688	8298	14106
Erythrotrichiaceae	Eukaryota	0	1	0
Esocidae	Eukaryota	14	7	7
Estrildidae	Eukaryota	2	0	0
Ettlia	Eukaryota	0	0	0
Eubacteriaceae	Bacteria <prokaryotes>	3184	4813	5776
Euglenaceae	Eukaryota	5	6	14
Eukaryota sp. BB2	Eukaryota	0	0	0
Eumetazoa	Eukaryota	105	101	245
Eunotiaceae	Eukaryota	0	0	0
Euphorbiaceae	Eukaryota	113	76	152
Eupodiscaceae	Eukaryota	3	0	0
Eurypygidae	Eukaryota	2	0	14
Ezakiella	Bacteria <prokaryotes>	30	70	88
FCB group	Bacteria <prokaryotes>	65	132	86
Fabaceae	Eukaryota	267	331	703
Falconidae	Eukaryota	1	2	3
Fangia	Bacteria <prokaryotes>	787	913	1609
Felidae	Eukaryota	4	12	8
Fenollaria	Bacteria <prokaryotes>	59	135	69
Ferrimonadaceae	Bacteria <prokaryotes>	642	571	697
Ferroplasmaceae	Archaea	81	202	208
Ferrovaceae	Bacteria <prokaryotes>	462	353	519
Fervidobacteriaceae	Bacteria <prokaryotes>	4835	8815	8760
Fibrobacteraceae	Bacteria <prokaryotes>	1062	986	1197
Fibroporia	Eukaryota	9	15	11
Fimbriimonadaceae	Bacteria <prokaryotes>	224	352	882
Flammeovirgaceae	Bacteria <prokaryotes>	5324	5634	9813
Flavobacteria bacterium BBFL7	Bacteria <prokaryotes>	56	10	49
Flavobacteria bacterium MS024-2A	Bacteria <prokaryotes>	3993	6656	13164
Flavobacteria bacterium MS024-3C	Bacteria <prokaryotes>	120	253	226
Flavobacteriaceae	Bacteria <prokaryotes>	48904	59662	92061
Flavobacterium phage Fpv20	Viruses	41	2	4
Flavobacterium phage Fpv3	Viruses	115	15	183
Flavonifractor	Bacteria <prokaryotes>	258	216	283
Fonticula	Eukaryota	20	15	31
Formicidae	Eukaryota	605	840	1462
Fortieaceae	Bacteria <prokaryotes>	48	39	45
Fragilariaceae	Eukaryota	0	6	11
Francisellaceae	Bacteria <prokaryotes>	4890	5893	8052
Frankiaceae	Bacteria <prokaryotes>	3136	5360	9702
Fringillidae	Eukaryota	0	0	0
Fucaceae	Eukaryota	0	0	0
Funariaceae	Eukaryota	265	346	181
Fundulidae	Eukaryota	15	13	9
Fusobacteriaceae	Bacteria <prokaryotes>	4413	6146	10259
Fusochloris	Eukaryota	0	0	0
Galagidae	Eukaryota	2	2	4
Galaxauraceae	Eukaryota	0	0	0
Gallaecimonas	Bacteria <prokaryotes>	227	217	222
Gallionellaceae	Bacteria <prokaryotes>	913	2355	2541
Gammaridae	Eukaryota	0	0	0
Gasterosteidae	Eukaryota	0	0	0
Gastropod associated circular ssDNA virus	Viruses	0	0	0
Gavialidae	Eukaryota	6	5	0
Gaviidae	Eukaryota	0	0	0
Gekkonidae	Eukaryota	8	9	9
Gelidiaceae	Eukaryota	11	5	33
Geminella	Eukaryota	0	0	0
Geminicoccus	Bacteria <prokaryotes>	862	1073	1907
Geminigeraceae	Eukaryota	1087	816	822
Gemmataceae	Bacteria <prokaryotes>	4948	2638	4470
Gemmatimonadaceae	Bacteria <prokaryotes>	150	208	529
Geobacillus virus E2	Viruses	3	0	10
Geobacteraceae	Bacteria <prokaryotes>	3741	5489	7650
Geodermatophilaceae	Bacteria <prokaryotes>	3115	4334	6257
Geomicrobium	Bacteria <prokaryotes>	309	292	320
Geomitridae	Eukaryota	0	0	0
Geoplanidae	Eukaryota	0	0	0
Geotoga	Bacteria <prokaryotes>	1015	1329	1431
Geraniaceae	Eukaryota	0	0	0
Gesneriaceae	Eukaryota	0	0	0
Gigartinaceae	Eukaryota	87	88	131
Gigasporaceae	Eukaryota	0	0	0
Ginkgoaceae	Eukaryota	1	1	0
Glaucocystaceae	Eukaryota	0	0	0
Gloeobacteraceae	Bacteria <prokaryotes>	762	1302	543
Gloeochaetaceae	Eukaryota	0	4	2
Gloeomargaritaceae	Bacteria <prokaryotes>	117	322	135
Gloeophyllaceae	Eukaryota	26	15	11
Gloeotilopsis	Eukaryota	0	0	0
Gloiosiphoniaceae	Eukaryota	0	0	0
Glomeraceae	Eukaryota	0	0	0
Glomerellaceae	Eukaryota	118	148	26
Glossiphoniidae	Eukaryota	77	83	90
Glossoscolecidae	Eukaryota	0	0	0
Glycomycetaceae	Bacteria <prokaryotes>	872	1387	1601
Gobiidae	Eukaryota	32	21	30
Gomontiellaceae	Bacteria <prokaryotes>	241	210	253
Gomphonemataceae	Eukaryota	12	15	35
Gongylonematidae	Eukaryota	0	0	0
Gordoniaceae	Bacteria <prokaryotes>	612	1483	1686
Gorgoniidae	Eukaryota	0	1	4
Gottschalkia	Bacteria <prokaryotes>	406	787	419
Gracilariaceae	Eukaryota	9	7	10
Granulosicoccaceae	Bacteria <prokaryotes>	879	1145	2742
Gregarinidae	Eukaryota	21	45	28
Grimmiaceae	Eukaryota	0	0	0
Gruidae	Eukaryota	0	0	2
Gryllidae	Eukaryota	0	0	0
Gymnochlora	Eukaryota	0	0	0
Gymnodiniaceae	Eukaryota	0	0	0
Haemoproteidae	Eukaryota	0	0	0
Hafniaceae	Bacteria <prokaryotes>	542	216	293
Hahellaceae	Bacteria <prokaryotes>	9918	8295	13437
Halanaerobiaceae	Bacteria <prokaryotes>	5780	7454	9509
Halcampoididae	Eukaryota	0	0	0
Haliclystidae	Eukaryota	0	0	0
Halictidae	Eukaryota	4	10	9
Halieaceae	Bacteria <prokaryotes>	6111	4988	14464
Haliscomenobacteraceae	Bacteria <prokaryotes>	598	503	714
Haloarculaceae	Archaea	327	761	751
Halobacteriaceae	Archaea	711	1941	1514
Halobacteriovoraceae	Bacteria <prokaryotes>	823	1410	1172
Halobacteroidaceae	Bacteria <prokaryotes>	8944	12772	19296
Halococcaceae	Archaea	41	491	58
Haloferacaceae	Archaea	1942	2153	1055
Halomonadaceae	Bacteria <prokaryotes>	5831	6542	15909
Haloplasmataceae	Bacteria <prokaryotes>	118	190	528
Halorubraceae	Archaea	406	626	723
Halothiobacillaceae	Bacteria <prokaryotes>	509	420	924
Haloviruses	Viruses	100	93	102
Halymeniaceae	Eukaryota	1	1	0
Hapalosiphonaceae	Bacteria <prokaryotes>	1317	2547	3849
Harpochytriaceae	Eukaryota	0	0	0
Harrimaniidae	Eukaryota	94	97	351
Hartmannellidae	Eukaryota	0	0	0
Helicobacteraceae	Bacteria <prokaryotes>	4740	4545	5857
Helicosporidium	Eukaryota	0	0	0
Heliobacteriaceae	Bacteria <prokaryotes>	250	138	323
Helioporidae	Eukaryota	0	1	0
Helotiaceae	Eukaryota	2	4	1
Hemiaulaceae	Eukaryota	1	0	0
Hemiselmidaceae	Eukaryota	12	23	25
Herpesviridae	Viruses	1	2	1
Herpetosiphonaceae	Bacteria <prokaryotes>	409	485	905
Herpotrichiellaceae	Eukaryota	62	146	180
Hesperiidae	Eukaryota	0	0	0
Heterobranchia	Eukaryota	1	1	0
Heteromyidae	Eukaryota	0	0	0
Hexamitidae	Eukaryota	951	152	265
Hildenbrandiaceae	Eukaryota	0	0	0
Hipposideridae	Eukaryota	13	10	73
Histionidae	Eukaryota	4	28	45
Holophagaceae	Bacteria <prokaryotes>	289	660	593
Holosporaceae	Bacteria <prokaryotes>	1108	2001	4823
Hominidae	Eukaryota	17	2	8
Homolidae	Eukaryota	0	0	0
Hormathiidae	Eukaryota	0	0	0
Hyalellidae	Eukaryota	204	217	228
Hyaloraphidium	Eukaryota	0	0	0
Hydractiniidae	Eukaryota	0	0	0
Hydridae	Eukaryota	81	101	108
Hydrococcaceae	Bacteria <prokaryotes>	81	148	133
Hydrogenimonas	Bacteria <prokaryotes>	503	669	697
Hydrogenophilaceae	Bacteria <prokaryotes>	44	70	108
Hydrogenothermaceae	Bacteria <prokaryotes>	3606	5049	7438
Hydrometridae	Eukaryota	0	0	0
Hydrophilidae	Eukaryota	0	0	0
Hyellaceae	Bacteria <prokaryotes>	1217	1580	1854
Hylobatidae	Eukaryota	8	3	3
Hymenobacteraceae	Bacteria <prokaryotes>	3183	4796	5718
Hymenochaetaceae	Eukaryota	16	20	29
Hyphomicrobiaceae	Bacteria <prokaryotes>	16304	20325	46168
Hyphomonadaceae	Bacteria <prokaryotes>	9658	11478	17222
Hypocreaceae	Eukaryota	22	30	24
Hypogastruridae	Eukaryota	0	0	0
Hytrosaviridae	Viruses	1	0	0
Ibaliidae	Eukaryota	0	0	0
Ichthyophthirius	Eukaryota	90	84	122
Ictaluridae	Eukaryota	16	6	18
Idiomarinaceae	Bacteria <prokaryotes>	1931	2226	6562
Idiomarinaceae phage 1N2-2	Viruses	54	12	138
Ignatzschineria	Bacteria <prokaryotes>	369	164	290
Ignavibacteriaceae	Bacteria <prokaryotes>	2264	3456	2802
Immundisolibacteraceae	Bacteria <prokaryotes>	284	240	623
Indriidae	Eukaryota	1	0	4
Inoviridae	Viruses	0	0	0
Intestinimonas	Bacteria <prokaryotes>	30	21	15
Intrasporangiaceae	Bacteria <prokaryotes>	2988	5444	7402
Iridoviridae	Viruses	2718	1470	1896
Isosphaeraceae	Bacteria <prokaryotes>	686	879	1902
Isotomidae	Eukaryota	68	46	71
Ixodidae	Eukaryota	357	727	695
Jakobidae	Eukaryota	38	25	38
Jenufa	Eukaryota	0	1	0
Jiangellaceae	Bacteria <prokaryotes>	1632	2975	6141
Jonesiaceae	Bacteria <prokaryotes>	95	156	684
Juglandaceae	Eukaryota	28	22	26
Kallipyga	Bacteria <prokaryotes>	118	141	49
Kangiellaceae	Bacteria <prokaryotes>	1819	1829	3362
Kaumoebavirus	Viruses	22	40	122
Kiloniellaceae	Bacteria <prokaryotes>	15199	25877	50405
Kineosporiaceae	Bacteria <prokaryotes>	734	317	2165
Kinetoplastibacterium	Bacteria <prokaryotes>	569	699	482
Kiritimatiellaceae	Bacteria <prokaryotes>	775	1518	1858
Klebsormidiaceae	Eukaryota	0	0	0
Kofleriaceae	Bacteria <prokaryotes>	304	241	682
Koliellaceae	Eukaryota	0	0	0
Kordiimonadaceae	Bacteria <prokaryotes>	2496	4614	10746
Kosmotogaceae	Bacteria <prokaryotes>	861	1379	1688
Ktedonobacteraceae	Bacteria <prokaryotes>	433	706	843
Labridae	Eukaryota	24	4	13
Lachnospiraceae	Bacteria <prokaryotes>	10564	12967	17152
Lactobacillaceae	Bacteria <prokaryotes>	3815	4987	5962
Lactobacillus prophage Lj771	Viruses	0	0	0
Lake Sarah-associated circular molecule 5	Viruses	1	0	0
Lake Sarah-associated circular virus-11	Viruses	0	0	0
Lake Sarah-associated circular virus-19	Viruses	0	0	0
Lake Sarah-associated circular virus-3	Viruses	0	0	0
Lake Sarah-associated circular virus-42	Viruses	0	0	0
Lamiaceae	Eukaryota	0	0	0
Laminariaceae	Eukaryota	0	0	0
Lasiosphaeriaceae	Eukaryota	3	5	4
Lavidaviridae	Viruses	35	15	13
Lawsonella	Bacteria <prokaryotes>	30	68	98
Legionellaceae	Bacteria <prokaryotes>	8641	9990	18296
Lentibulariaceae	Eukaryota	0	0	1
Lentimicrobiaceae	Bacteria <prokaryotes>	82	125	228
Lentisphaeraceae	Bacteria <prokaryotes>	290	225	702
Lepadidae	Eukaryota	0	0	0
Lepisosteidae	Eukaryota	4	10	15
Leporidae	Eukaryota	2	5	30
Leptocylindraceae	Eukaryota	0	0	1
Leptolyngbyaceae	Bacteria <prokaryotes>	4398	4008	7100
Leptopilina boulardi filamentous virus	Viruses	0	0	0
Leptosomidae	Eukaryota	0	0	0
Leptosphaeriaceae	Eukaryota	2	5	23
Leptospiraceae	Bacteria <prokaryotes>	25246	25514	28263
Leptotrichiaceae	Bacteria <prokaryotes>	2719	3586	5271
Leucocytozoidae	Eukaryota	0	0	0
Leuconostocaceae	Bacteria <prokaryotes>	650	475	849
Leucopsacidae	Eukaryota	0	0	0
Levyella	Bacteria <prokaryotes>	0	2	5
Lewinellaceae	Bacteria <prokaryotes>	986	2063	2116
Liagoraceae	Eukaryota	3	3	8
Limnephilidae	Eukaryota	0	0	0
Limnochordaceae	Bacteria <prokaryotes>	568	1202	1244
Limulidae	Eukaryota	43	76	143
Lingulidae	Eukaryota	154	260	611
Lipotidae	Eukaryota	58	59	91
Listeriaceae	Bacteria <prokaryotes>	1156	1787	2915
Lithodesmiaceae	Eukaryota	0	0	1
Littorinidae	Eukaryota	0	0	0
Liviidae	Eukaryota	32	40	92
Loktanella phage pCB2051-A	Viruses	11	5	0
Lotharella	Eukaryota	0	0	0
Lottiidae	Eukaryota	135	247	313
Macroscelididae	Eukaryota	43	23	11
Magnaporthaceae	Eukaryota	20	84	110
Magnetococcaceae	Bacteria <prokaryotes>	2118	3641	4951
Malacoherpesviridae	Viruses	0	0	0
Malasseziaceae	Eukaryota	24	35	83
Malawimonadidae	Eukaryota	0	1	4
Mallomonadaceae	Eukaryota	0	0	1
Malvaceae	Eukaryota	260	392	366
Mamiellaceae	Eukaryota	1476	1135	873
Mandibulata	Eukaryota	0	0	4
Manidae	Eukaryota	2	2	8
Marasmiaceae	Eukaryota	12	11	25
Marattiaceae	Eukaryota	0	0	0
Marchantiaceae	Eukaryota	0	0	0
Marine Group I	Archaea	651	5702	488090
Marinifilaceae	Bacteria <prokaryotes>	121	184	196
Marinilabiliaceae	Bacteria <prokaryotes>	1324	1279	1421
Marinitoga	Bacteria <prokaryotes>	1247	1887	2418
Marinomonas phage P12026	Viruses	204	16	140
Mariprofundaceae	Bacteria <prokaryotes>	540	1038	1296
Marseilleviridae	Viruses	118	453	366
McMurdo Ice Shelf pond-associated circular DNA virus-8	Viruses	0	0	0
Megachilidae	Eukaryota	8	13	26
Megophryidae	Eukaryota	0	0	0
Melampsoraceae	Eukaryota	33	33	15
Melioribacteraceae	Bacteria <prokaryotes>	1972	3804	5170
Merismopediaceae	Bacteria <prokaryotes>	161	300	241
Meropidae	Eukaryota	0	0	1
Meruliaceae	Eukaryota	0	0	0
Merulinidae	Eukaryota	187	167	386
Mesitornithidae	Eukaryota	0	1	1
Mesoaciditogaceae	Bacteria <prokaryotes>	535	906	1659
Mesostigmataceae	Eukaryota	0	0	1
Mesotaeniaceae	Eukaryota	7	0	6
Methanobacteriaceae	Archaea	2419	3537	4941
Methanocaldococcaceae	Archaea	1096	1744	2284
Methanocellaceae	Archaea	229	468	1331
Methanococcaceae	Archaea	834	1223	2815
Methanocorpusculaceae	Archaea	28	131	89
Methanomassiliicoccaceae	Archaea	780	274	771
Methanomicrobiaceae	Archaea	1115	2294	2558
Methanonatronarchaeum	Archaea	112	152	162
Methanopyraceae	Archaea	6	51	28
Methanoregulaceae	Archaea	699	2622	1494
Methanosaetaceae	Archaea	32	40	63
Methanosarcinaceae	Archaea	3185	3211	5467
Methanospirillaceae	Archaea	56	116	146
Methanothermaceae	Archaea	155	245	163
Methermicoccaceae	Archaea	12	22	35
Methylacidiphilaceae	Bacteria <prokaryotes>	249	530	577
Methylobacteriaceae	Bacteria <prokaryotes>	10603	6528	11158
Methylobrevis	Bacteria <prokaryotes>	122	245	414
Methyloceanibacter	Bacteria <prokaryotes>	3192	3504	5595
Methylococcaceae	Bacteria <prokaryotes>	14795	16524	23503
Methylocystaceae	Bacteria <prokaryotes>	12425	18993	34645
Methyloligella	Bacteria <prokaryotes>	731	1455	2926
Methylophilaceae	Bacteria <prokaryotes>	4126	6147	6389
Methylothermaceae	Bacteria <prokaryotes>	318	583	722
Metschnikowiaceae	Eukaryota	222	312	529
Micavibrio	Bacteria <prokaryotes>	19084	11415	14210
Microascaceae	Eukaryota	13	1	5
Microbacteriaceae	Bacteria <prokaryotes>	5545	8008	16649
Microbotryaceae	Eukaryota	0	0	0
Microbulbiferaceae	Bacteria <prokaryotes>	2169	2243	3795
Micrococcaceae	Bacteria <prokaryotes>	4318	4840	8825
Microcoleaceae	Bacteria <prokaryotes>	5570	6204	7312
Microcystaceae	Bacteria <prokaryotes>	1551	1077	1300
Microhylidae	Eukaryota	0	0	0
Micromonas pusilla virus 12T	Viruses	965	444	926
Micromonosporaceae	Bacteria <prokaryotes>	8428	9113	15818
Microscillaceae	Bacteria <prokaryotes>	324	331	583
Microsporaceae	Eukaryota	0	0	0
Microthrixaceae	Bacteria <prokaryotes>	3948	6715	10445
Microviridae	Viruses	267	11	12
Mimiviridae	Viruses	3918	3098	5133
Miraciidae	Eukaryota	0	0	0
Mitosporidium	Eukaryota	22	30	18
Mixiaceae	Eukaryota	60	88	58
Mollivirus sibericum	Viruses	4	0	1
Mongoliimonas	Bacteria <prokaryotes>	427	887	800
Monodopsidaceae	Eukaryota	63	49	110
Monomastigaceae	Eukaryota	0	0	0
Moraceae	Eukaryota	32	17	35
Moraxellaceae	Bacteria <prokaryotes>	11197	9160	17422
Morganellaceae	Bacteria <prokaryotes>	7247	3085	5032
Moritellaceae	Bacteria <prokaryotes>	324	343	992
Mortierellaceae	Eukaryota	148	103	163
Muribaculaceae	Bacteria <prokaryotes>	6	20	34
Muridae	Eukaryota	5	24	7
Musaceae	Eukaryota	210	450	378
Muscicapidae	Eukaryota	12	16	9
Muscidae	Eukaryota	145	34	60
Musophagidae	Eukaryota	1	0	0
Mustelidae	Eukaryota	2	3	31
Mychonastaceae	Eukaryota	0	0	0
Mycobacteriaceae	Bacteria <prokaryotes>	9054	12826	14495
Mycoplasmataceae	Bacteria <prokaryotes>	2097	3108	4873
Mycosphaerellaceae	Eukaryota	19	22	40
Myoviridae	Viruses	273765	204888	210132
Myrmeleontidae	Eukaryota	0	0	0
Myrtaceae	Eukaryota	21	47	48
Mytilidae	Eukaryota	0	0	0
Myxococcaceae	Bacteria <prokaryotes>	1147	1164	1162
Nakamurellaceae	Bacteria <prokaryotes>	375	617	1838
Nannocystaceae	Bacteria <prokaryotes>	160	194	441
Natranaerobiaceae	Bacteria <prokaryotes>	429	690	618
Natrialbaceae	Archaea	1191	1244	1817
Nautiliaceae	Bacteria <prokaryotes>	406	766	1095
Naviculaceae	Eukaryota	1	0	4
Ndongobacter	Bacteria <prokaryotes>	8	20	8
Nectriaceae	Eukaryota	19	65	83
Neiella	Bacteria <prokaryotes>	148	164	168
Neisseriaceae	Bacteria <prokaryotes>	3688	2137	3008
Nelumbonaceae	Eukaryota	34	29	62
Nematocida	Eukaryota	61	66	109
Nemouridae	Eukaryota	0	0	0
Neochloridaceae	Eukaryota	0	0	0
Neocystis	Eukaryota	0	0	0
Neodangemannia	Eukaryota	0	0	0
Neofamilia	Bacteria <prokaryotes>	93	253	11
Neotrigoniidae	Eukaryota	0	0	0
Nephroselmis	Eukaryota	1	1	0
Neritidae	Eukaryota	0	0	0
Niphatidae	Eukaryota	312	800	1400
Nitidulidae	Eukaryota	35	35	78
Nitratifractor	Bacteria <prokaryotes>	77	121	212
Nitratiruptor	Bacteria <prokaryotes>	149	207	350
Nitriliruptoraceae	Bacteria <prokaryotes>	5842	11438	19259
Nitrosomonadaceae	Bacteria <prokaryotes>	6430	6560	8466
Nitrosopumilaceae	Archaea	3010	7772	174104
Nitrososphaeraceae	Archaea	36	231	5799
Nitrospinaceae	Bacteria <prokaryotes>	1560	4117	11691
Nitrospiraceae	Bacteria <prokaryotes>	11833	13378	18183
Nitrospirae bacterium HCH-1	Bacteria <prokaryotes>	864	2009	1582
Nocardiaceae	Bacteria <prokaryotes>	4688	8705	10800
Nocardioidaceae	Bacteria <prokaryotes>	8186	13104	15667
Nocardiopsaceae	Bacteria <prokaryotes>	2844	4004	6399
Noctuidae	Eukaryota	7	12	29
Noelaerhabdaceae	Eukaryota	557	387	1006
Nosematidae	Eukaryota	38	43	87
Nostocaceae	Bacteria <prokaryotes>	4427	3893	3116
Nothobranchiidae	Eukaryota	7	1	16
Notoacmeibacteraceae	Bacteria <prokaryotes>	375	383	807
Nototheniidae	Eukaryota	8	10	16
Nucleariidae	Eukaryota	0	0	0
Nudiviridae	Viruses	0	0	0
Numididae	Eukaryota	0	1	4
OM43 clade	Bacteria <prokaryotes>	2382	2466	4940
Oceaniidae	Eukaryota	0	0	0
Oceanospirillaceae	Bacteria <prokaryotes>	18037	19403	33231
Ochotonidae	Eukaryota	0	0	0
Octodontidae	Eukaryota	1	2	0
Octopodidae	Eukaryota	65	77	68
Odobenidae	Eukaryota	2	0	13
Odoribacteraceae	Bacteria <prokaryotes>	177	210	487
Oedocladium	Eukaryota	0	0	0
Oedogonium	Eukaryota	0	0	0
Oleiphilaceae	Bacteria <prokaryotes>	2036	2440	3722
Olindiasidae	Eukaryota	0	0	0
Olindiidae	Eukaryota	0	0	1
Oltmannsiellopsis	Eukaryota	0	0	0
Onchocercidae	Eukaryota	38	26	43
Onygenaceae	Eukaryota	5	4	13
Ophiocordycipitaceae	Eukaryota	3	8	7
Ophiostomataceae	Eukaryota	8	17	21
Opisthocomidae	Eukaryota	6	8	2
Opisthorchiidae	Eukaryota	11	21	119
Opitutaceae	Bacteria <prokaryotes>	1756	1825	3092
Orbaceae	Bacteria <prokaryotes>	1369	1472	2460
Orbiliaceae	Eukaryota	15	12	42
Orchidaceae	Eukaryota	51	59	98
Ordosporidae	Eukaryota	22	19	51
Ornithorhynchidae	Eukaryota	0	5	3
Orthotrichaceae	Eukaryota	0	0	0
Orussidae	Eukaryota	7	11	26
Orycteropodidae	Eukaryota	1	1	4
Oscillatoriaceae	Bacteria <prokaryotes>	2827	4854	6040
Oscillochloridaceae	Bacteria <prokaryotes>	197	206	388
Oscillospiraceae	Bacteria <prokaryotes>	89	159	323
Osteoglossidae	Eukaryota	11	27	11
Osteoglossocephalai	Eukaryota	1	4	14
Ostreidae	Eukaryota	252	210	291
Ostreobiaceae	Eukaryota	0	1	0
Ostreococcus lucimarinus virus OlV5	Viruses	117	143	137
Otididae	Eukaryota	0	2	1
Oxalobacteraceae	Bacteria <prokaryotes>	9988	8021	16946
Pacmanvirus A23	Viruses	65	66	141
Paenibacillaceae	Bacteria <prokaryotes>	19495	19046	28825
Palmariaceae	Eukaryota	1	3	1
Palmophyllum	Eukaryota	0	0	0
Palpitomonas	Eukaryota	4	4	3
Paludibacteraceae	Bacteria <prokaryotes>	273	339	760
Pandoravirus dulcis	Viruses	1	0	2
Pandoravirus inopinatum	Viruses	0	6	8
Pandoravirus salinus	Viruses	0	4	4
Papilionidae	Eukaryota	51	88	115
Parachlamydiaceae	Bacteria <prokaryotes>	1142	1330	1565
Paracoccidioides	Eukaryota	6	8	2
Paralichthyidae	Eukaryota	17	8	54
Parameciidae	Eukaryota	114	146	131
Paramoebidae	Eukaryota	0	0	0
Parazoanthidae	Eukaryota	0	0	0
Paridae	Eukaryota	12	47	1
Partenskyella	Eukaryota	0	0	0
Parvularculaceae	Bacteria <prokaryotes>	997	1205	3199
Passerellidae	Eukaryota	0	1	2
Pasteurellaceae	Bacteria <prokaryotes>	5436	4150	5467
Patulibacteraceae	Bacteria <prokaryotes>	249	564	970
Paulinellidae	Eukaryota	31	2	21
Pavlovaceae	Eukaryota	2	0	0
Pectinidae	Eukaryota	92	94	131
Pectobacteriaceae	Bacteria <prokaryotes>	672	936	1708
Pedaliaceae	Eukaryota	13	18	24
Pediculidae	Eukaryota	43	67	61
Pedinomonadaceae	Eukaryota	0	0	0
Pelagibacteraceae	Bacteria <prokaryotes>	3655081	8480164	5628790
Pelagiidae	Eukaryota	0	0	0
Pelecanidae	Eukaryota	0	0	0
Penaeidae	Eukaryota	0	0	0
Pentatomidae	Eukaryota	47	142	292
Peptococcaceae	Bacteria <prokaryotes>	6196	8528	15373
Peptoniphilaceae	Bacteria <prokaryotes>	4586	7631	7172
Peptostreptococcaceae	Bacteria <prokaryotes>	10045	13794	15180
Peridiniaceae	Eukaryota	0	0	3
Perkinsidae	Eukaryota	163	215	152
Peronosporaceae	Eukaryota	0	0	0
Persicobacteraceae	Bacteria <prokaryotes>	172	269	201
Petrosiidae	Eukaryota	0	0	0
Petrotoga	Bacteria <prokaryotes>	248	237	522
Phacotaceae	Eukaryota	0	0	1
Phaeocystaceae	Eukaryota	6	7	26
Phaeocystis globosa virus virophage	Viruses	1216	96	34
Phaeodactylaceae	Eukaryota	225	258	453
Phaeosphaeriaceae	Eukaryota	41	19	84
Phaethontidae	Eukaryota	0	0	1
Phaffomycetaceae	Eukaryota	60	111	195
Phage Gifsy-2	Viruses	0	0	0
Phakopsoraceae	Eukaryota	0	0	0
Phalacrocoracidae	Eukaryota	0	0	1
Phanerochaetaceae	Eukaryota	8	5	16
Pharyngomonas	Eukaryota	0	0	0
Phascolarctidae	Eukaryota	19	19	11
Phasianidae	Eukaryota	7	18	59
Phialocephala <Helotiales>	Eukaryota	13	19	20
Phocaeicola	Bacteria <prokaryotes>	23	79	133
Phocidae	Eukaryota	8	4	55
Phormidium phage MIS-PhV1B	Viruses	8	0	0
Phrymaceae	Eukaryota	80	60	167
Phycisphaeraceae	Bacteria <prokaryotes>	122	87	558
Phycisphaerae bacterium L21-RPul-D3	Bacteria <prokaryotes>	133	182	303
Phycisphaerae bacterium SM-PulAB-D3	Bacteria <prokaryotes>	53	37	187
Phycisphaerae bacterium ST-PulAB-D4	Bacteria <prokaryotes>	28	43	65
Phycodnaviridae	Viruses	30563	33300	49289
Phycomycetaceae	Eukaryota	60	42	74
Phyllobacteriaceae	Bacteria <prokaryotes>	21750	30696	52658
Phyllophoraceae	Eukaryota	1	1	2
Physeteridae	Eukaryota	0	0	0
Phytophthora	Eukaryota	844	939	1147
Phytoseiidae	Eukaryota	44	45	70
Pichiaceae	Eukaryota	68	92	254
Picidae	Eukaryota	1	1	1
Picocystis	Eukaryota	1	0	0
Picrophilaceae	Archaea	44	39	64
Pieridae	Eukaryota	12	7	21
Pinaceae	Eukaryota	1	8	10
Pipidae	Eukaryota	47	49	28
Pipridae	Eukaryota	1	1	2
Piscirickettsiaceae	Bacteria <prokaryotes>	10045	12490	16468
Pithoviridae	Viruses	518	274	381
Placobranchidae	Eukaryota	0	0	0
Plakinidae	Eukaryota	0	0	0
Planctomycetaceae	Bacteria <prokaryotes>	9963	10555	25028
Planctonema	Eukaryota	0	0	0
Planococcaceae	Bacteria <prokaryotes>	1788	2705	5215
Planorbidae	Eukaryota	86	120	155
Plasmodiidae	Eukaryota	262	412	979
Plasmodiophoridae	Eukaryota	0	0	0
Plectosphaerellaceae	Eukaryota	5	5	12
Pleistophoridae	Eukaryota	56	94	16
Pleosporaceae	Eukaryota	176	137	723
Plesiomonas	Bacteria <prokaryotes>	63	63	151
Pleurobrachiidae	Eukaryota	0	0	0
Pleurotaceae	Eukaryota	0	0	0
Pleuroziaceae	Eukaryota	0	0	0
Plexauridae	Eukaryota	0	0	0
Plocamiaceae	Eukaryota	0	2	2
Plutellidae	Eukaryota	91	47	88
Pneumocystidaceae	Eukaryota	61	79	78
Poaceae	Eukaryota	496	767	1542
Podocarpaceae	Eukaryota	0	0	0
Podoviridae	Viruses	343984	181700	114476
Poeciliidae	Eukaryota	20	7	10
Polyangiaceae	Bacteria <prokaryotes>	40131	28998	31100
Polydnaviridae	Viruses	1	0	0
Polymorphum	Bacteria <prokaryotes>	760	120	199
Polyporaceae	Eukaryota	40	21	44
Polysphondylium	Eukaryota	87	78	159
Pomacentridae	Eukaryota	17	13	24
Porphyridiaceae	Eukaryota	59	42	398
Porphyromonadaceae	Bacteria <prokaryotes>	701	696	1960
Porticoccaceae	Bacteria <prokaryotes>	1176	1099	3029
Pottiaceae	Eukaryota	0	0	0
Potyviridae	Viruses	0	0	0
Poxviridae	Viruses	72	71	90
Prasinoderma	Eukaryota	0	0	0
Prevotellaceae	Bacteria <prokaryotes>	1973	2050	4099
Priapulidae	Eukaryota	39	39	43
Procellariidae	Eukaryota	0	0	0
Prochloraceae	Bacteria <prokaryotes>	43731	25629	29810
Prochlorococcus phage P-GSP1	Viruses	10398	2360	4206
Prochlorococcus phage P-SSP3	Viruses	5878	863	1120
Prolixibacteraceae	Bacteria <prokaryotes>	1164	1058	1800
Promicromonosporaceae	Bacteria <prokaryotes>	927	1361	1965
Propionibacteriaceae	Bacteria <prokaryotes>	1177	1496	2283
Prosorrhyncha	Eukaryota	0	0	0
Proteiniborus	Bacteria <prokaryotes>	730	1085	1651
Proteinivoraceae	Bacteria <prokaryotes>	433	810	737
Proteromonadidae	Eukaryota	0	0	0
Psathyrellaceae	Eukaryota	10	22	14
Pseudanabaenaceae	Bacteria <prokaryotes>	1235	1393	2090
Pseudendoclonium	Eukaryota	0	0	0
Pseudeurotiaceae	Eukaryota	87	25	100
Pseudoalteromonadaceae	Bacteria <prokaryotes>	16323	14703	22826
Pseudoalteromonas phage BS5	Viruses	0	0	12
Pseudoalteromonas phage PH1	Viruses	8	2	6
Pseudochloris	Eukaryota	0	0	0
Pseudoflavonifractor	Bacteria <prokaryotes>	89	74	203
Pseudohongiella	Bacteria <prokaryotes>	3014	2552	8282
Pseudomonadaceae	Bacteria <prokaryotes>	29133	23727	42731
Pseudomonas phage O4	Viruses	138	51	81
Pseudomonas phage PA11	Viruses	24	5	42
Pseudomonas phage phiPto-bp6g	Viruses	0	9	0
Pseudomonas phage vB_PaeM_MAG1	Viruses	0	0	0
Pseudomonas phage vB_PaeP_Tr60_Ab31	Viruses	2	1	26
Pseudomuriellaceae	Eukaryota	0	0	0
Pseudoneochloris	Eukaryota	0	0	1
Pseudonocardiaceae	Bacteria <prokaryotes>	13519	16229	26505
Pseudorhodoplanes	Bacteria <prokaryotes>	798	1744	3792
Psittacidae	Eukaryota	3	5	13
Psittaculidae	Eukaryota	0	0	0
Psychromonadaceae	Bacteria <prokaryotes>	1196	1631	3098
Pterocladiaceae	Eukaryota	0	0	0
Pteroclidae	Eukaryota	0	0	1
Pteromalidae	Eukaryota	32	57	365
Pteropodidae	Eukaryota	5	1	7
Pucciniaceae	Eukaryota	4	10	17
Punctulariaceae	Eukaryota	9	13	19
Puniceicoccaceae	Bacteria <prokaryotes>	308	255	797
Pycnococcaceae	Eukaryota	0	0	0
Pyralidae	Eukaryota	13	7	11
Pyramimonas	Eukaryota	0	0	0
Pyrenomonadaceae	Eukaryota	0	0	0
Pyrinomonas	Bacteria <prokaryotes>	172	239	536
Pyrodictiaceae	Archaea	36	102	102
Pyroglyphidae	Eukaryota	0	0	0
Pythiaceae	Eukaryota	2	1	0
Pythonidae	Eukaryota	18	7	11
Ralstonia phage RS138	Viruses	1	1	2
Reduviidae	Eukaryota	0	0	0
Renillidae	Eukaryota	0	0	0
Reoviridae	Viruses	4	0	1
Retroviridae	Viruses	1	0	1
Reyranella	Bacteria <prokaryotes>	690	1013	3314
Rhabditidae	Eukaryota	34	85	141
Rhamnaceae	Eukaryota	18	81	65
Rhincodontidae	Eukaryota	113	74	63
Rhinocerotidae	Eukaryota	0	0	0
Rhinolophidae	Eukaryota	1	2	1
Rhizobiaceae	Bacteria <prokaryotes>	55467	45278	63468
Rhizobium phage RHEph10	Viruses	841	347	125
Rhizosoleniaceae	Eukaryota	1	0	10
Rhizostomatidae	Eukaryota	0	0	0
Rhodanobacteraceae	Bacteria <prokaryotes>	3717	2987	4093
Rhodobacter phage RcapNL	Viruses	0	0	0
Rhodobacteraceae	Bacteria <prokaryotes>	106335	122837	344575
Rhodobiaceae	Bacteria <prokaryotes>	12175	16487	29747
Rhodochaetaceae	Eukaryota	0	0	1
Rhodocyclaceae	Bacteria <prokaryotes>	450	468	848
Rhodomelaceae	Eukaryota	33	25	119
Rhodospirillaceae	Bacteria <prokaryotes>	125562	166692	318659
Rhodothermaceae	Bacteria <prokaryotes>	1234	1858	2239
Rhodymeniaceae	Eukaryota	27	40	12
Rickettsiaceae	Bacteria <prokaryotes>	6454	10348	21824
Rikenellaceae	Bacteria <prokaryotes>	665	539	1176
Rivulariaceae	Bacteria <prokaryotes>	916	1098	1858
Rivulidae	Eukaryota	9	14	64
Rosaceae	Eukaryota	126	192	451
Roseiflexaceae	Bacteria <prokaryotes>	248	356	936
Rossellidae	Eukaryota	0	0	0
Ruaniaceae	Bacteria <prokaryotes>	126	173	593
Rubricoccaceae	Bacteria <prokaryotes>	360	381	1468
Rubritaleaceae	Bacteria <prokaryotes>	138	99	245
Rubrobacteraceae	Bacteria <prokaryotes>	1237	2974	4098
Ruminococcaceae	Bacteria <prokaryotes>	7569	7084	9182
Rutaceae	Eukaryota	86	110	143
SAR116 cluster	Bacteria <prokaryotes>	14174	17407	64969
SAR92 clade	Bacteria <prokaryotes>	1205	1407	2232
Saccharomycetaceae	Eukaryota	312	628	1008
Saccharospirillaceae	Bacteria <prokaryotes>	626	527	1410
Saccotheciaceae	Eukaryota	19	9	48
Sagittidae	Eukaryota	0	0	0
Sagittiferidae	Eukaryota	0	0	0
Saitoella	Eukaryota	16	20	17
Salicaceae	Eukaryota	162	219	309
Salicola phage CGphi29	Viruses	50	8	66
Salinisphaeraceae	Bacteria <prokaryotes>	48422	31435	40090
Salinivirgaceae	Bacteria <prokaryotes>	189	146	241
Salisaeta icosahedral phage 1	Viruses	35	17	34
Salmonella phage 64795_sal3	Viruses	0	2	7
Salmonella phage Fels-1	Viruses	4	0	2
Salmonidae	Eukaryota	30	55	64
Salpingoecidae	Eukaryota	1368	678	1065
Sandaracinaceae	Bacteria <prokaryotes>	365	542	797
Sanguibacteraceae	Bacteria <prokaryotes>	75	64	143
Saprolegniaceae	Eukaryota	925	1471	2172
Saprospiraceae	Bacteria <prokaryotes>	1079	803	1481
Sarcocystidae	Eukaryota	51	56	109
Sargassaceae	Eukaryota	0	0	0
Schistosomatidae	Eukaryota	59	68	69
Schizomeridaceae	Eukaryota	0	1	0
Schizophyllaceae	Eukaryota	9	7	8
Schizosaccharomycetaceae	Eukaryota	83	88	112
Schizymeniaceae	Eukaryota	6	6	0
Schleiferiaceae	Bacteria <prokaryotes>	105	80	93
Sciadopityaceae	Eukaryota	0	0	0
Sciaenidae	Eukaryota	0	2	13
Scinaiaceae	Eukaryota	0	0	0
Sciuridae	Eukaryota	4	4	7
Sclerotiniaceae	Eukaryota	3	4	9
Scolopacidae	Eukaryota	50	57	144
Scytonemataceae	Bacteria <prokaryotes>	440	426	611
Scytosiphonaceae	Eukaryota	0	0	0
Sebdeniaceae	Eukaryota	0	0	0
Seculamonas	Eukaryota	0	0	1
Sedimentibacter	Bacteria <prokaryotes>	46	100	105
Sedimenticola	Bacteria <prokaryotes>	1486	2098	2718
Segniliparaceae	Bacteria <prokaryotes>	27	44	84
Selaginellaceae	Eukaryota	87	84	168
Selenastraceae	Eukaryota	36	53	81
Selenomonadaceae	Bacteria <prokaryotes>	3058	3765	3820
Serpulaceae	Eukaryota	5	3	17
Serrasalmidae	Eukaryota	28	40	31
Shewanellaceae	Bacteria <prokaryotes>	4760	4017	5737
Siderastreidae	Eukaryota	0	1	0
Silphidae	Eukaryota	18	13	49
Simkaniaceae	Bacteria <prokaryotes>	578	514	939
Sinentomidae	Eukaryota	0	0	0
Sinobacteraceae	Bacteria <prokaryotes>	1729	2112	3203
Siphonariidae	Eukaryota	0	0	0
Siphoviridae	Viruses	54167	39735	46229
Skeletonemataceae	Eukaryota	0	0	0
Sneathiellaceae	Bacteria <prokaryotes>	6461	11061	23574
Solanaceae	Eukaryota	119	230	322
Solibacteraceae	Bacteria <prokaryotes>	209	276	423
Solieriaceae	Eukaryota	0	0	0
Solirubrobacteraceae	Bacteria <prokaryotes>	619	1087	2089
Solirubrum	Bacteria <prokaryotes>	30	15	112
Sordariaceae	Eukaryota	88	231	212
Soricidae	Eukaryota	0	1	1
Spalacidae	Eukaryota	0	1	4
Sphaerobacteraceae	Bacteria <prokaryotes>	2196	4388	7216
Sphaeroforma	Eukaryota	1007	426	555
Sphaerolipoviridae	Viruses	32	0	1
Sphaeropleaceae	Eukaryota	0	0	0
Spheniscidae	Eukaryota	5	13	2
Sphingobacteriaceae	Bacteria <prokaryotes>	11374	9596	13001
Sphingomonadaceae	Bacteria <prokaryotes>	24650	17958	35881
Spirochaetaceae	Bacteria <prokaryotes>	4193	5763	9758
Spiroplasmataceae	Bacteria <prokaryotes>	420	481	839
Spirulinaceae	Bacteria <prokaryotes>	116	301	229
Spizellomycetaceae	Eukaryota	91	185	178
Spongiibacteraceae	Bacteria <prokaryotes>	5087	4934	8868
Sporanaerobacter	Bacteria <prokaryotes>	633	699	780
Sporichthyaceae	Bacteria <prokaryotes>	268	116	823
Sporidiobolaceae	Eukaryota	26	43	42
Sporocadaceae	Eukaryota	9	21	30
Sporolactobacillaceae	Bacteria <prokaryotes>	906	1555	1284
Sporolithaceae	Eukaryota	1	0	0
Sporomusaceae	Bacteria <prokaryotes>	2650	3043	3584
Staphylococcaceae	Bacteria <prokaryotes>	5127	6429	8309
Staphylococcus phage tp310-1	Viruses	0	0	0
Stenopodidae	Eukaryota	0	0	0
Stenostomidae	Eukaryota	0	0	0
Stereaceae	Eukaryota	11	8	16
Sterolibacteriaceae	Bacteria <prokaryotes>	1082	2140	1471
Stichococcus	Eukaryota	0	0	0
Stigeoclonium	Eukaryota	0	0	2
Streptococcaceae	Bacteria <prokaryotes>	3605	3498	3371
Streptococcus phage 370.1	Viruses	1	1	3
Streptococcus phage phiARI0004	Viruses	0	0	5
Streptococcus phage phiARI0462	Viruses	0	0	0
Streptomycetaceae	Bacteria <prokaryotes>	18479	21869	39221
Streptosporangiaceae	Bacteria <prokaryotes>	5265	8036	14264
Strongylocentrotidae	Eukaryota	143	199	300
Struthionidae	Eukaryota	1	3	3
Sturnidae	Eukaryota	83	14	3
Styelidae	Eukaryota	0	0	0
Stylonemataceae	Eukaryota	0	0	0
Styracaceae	Eukaryota	0	0	0
Succinivibrionaceae	Bacteria <prokaryotes>	899	753	586
Suidae	Eukaryota	0	5	0
Sulfitobacter phage NYA-2014a	Viruses	69	11	35
Sulfitobacter phage pCB2047-A	Viruses	16	2	56
Sulfitobacter phage pCB2047-C	Viruses	54	110	5
Sulfolobaceae	Archaea	711	855	826
Sulfolobus monocaudavirus SMV2	Viruses	1	3	5
Sulfurovum	Bacteria <prokaryotes>	519	357	352
Sutterellaceae	Bacteria <prokaryotes>	1737	802	1221
Symbiobacteriaceae	Bacteria <prokaryotes>	227	297	1162
Symphyonemataceae	Bacteria <prokaryotes>	122	452	42
Sympoventuriaceae	Eukaryota	15	13	62
Synbranchidae	Eukaryota	8	6	59
Synechococcaceae	Bacteria <prokaryotes>	11280	7842	9557
Synechococcus phage S-CAM22	Viruses	1559	948	925
Synechococcus phage S-CAM3	Viruses	1049	633	1210
Synechococcus phage S-CAM4	Viruses	84	57	116
Synechococcus phage S-CAM7	Viruses	1076	1046	1336
Synechococcus phage S-CAM9	Viruses	5901	4813	9978
Synechococcus phage S-CBP2	Viruses	109	67	46
Synechococcus phage S-CBP3	Viruses	9287	4472	2294
Synergistaceae	Bacteria <prokaryotes>	2344	2573	1825
Syngnathidae	Eukaryota	50	47	67
Syntrophaceae	Bacteria <prokaryotes>	1163	1874	2900
Syntrophobacteraceae	Bacteria <prokaryotes>	507	1000	2628
Syntrophomonadaceae	Bacteria <prokaryotes>	2009	2531	4626
Syntrophorhabdaceae	Bacteria <prokaryotes>	347	494	789
Talpidae	Eukaryota	20	0	0
Tannerellaceae	Bacteria <prokaryotes>	884	907	1289
Tarsiidae	Eukaryota	5	4	12
Taxaceae	Eukaryota	0	0	0
Tenebrionidae	Eukaryota	43	43	110
Tenrecidae	Eukaryota	230	288	547
Tenthredinidae	Eukaryota	6	3	7
Tephritidae	Eukaryota	201	233	519
Tepidimicrobium	Bacteria <prokaryotes>	949	1291	848
Terasakiispira	Bacteria <prokaryotes>	134	127	251
Teratosphaeriaceae	Eukaryota	7	9	11
Termopsidae	Eukaryota	126	17	23
Terrimicrobium	Bacteria <prokaryotes>	374	484	754
Tetragonuridae	Eukaryota	0	0	0
Tetrahymenidae	Eukaryota	676	388	611
Tetranychidae	Eukaryota	106	41	83
Tetraodontidae	Eukaryota	21	9	34
Tetraselmis viridis virus S1	Viruses	109	95	36
Tetraselmis viridis virus S20	Viruses	0	1	0
Thalassiosiraceae	Eukaryota	127	201	280
Theileriidae	Eukaryota	92	105	152
Theria <Mammalia>	Eukaryota	11	16	35
Theridiidae	Eukaryota	259	317	402
Thermaceae	Bacteria <prokaryotes>	1872	3101	4756
Thermithiobacillaceae	Bacteria <prokaryotes>	290	214	444
Thermoactinomycetaceae	Bacteria <prokaryotes>	2899	3236	4494
Thermoanaerobacteraceae	Bacteria <prokaryotes>	18317	21062	25077
Thermoanaerobacterales Family III. Incertae Sedis	Bacteria <prokaryotes>	3796	5979	8342
Thermoanaerobacterales Family IV. Incertae Sedis	Bacteria <prokaryotes>	474	317	648
Thermoanaerobaculum	Bacteria <prokaryotes>	77	61	155
Thermobaculum	Bacteria <prokaryotes>	2398	4096	5165
Thermobispora	Bacteria <prokaryotes>	176	403	254
Thermococcaceae	Archaea	1921	3209	2779
Thermodesulfobacteriaceae	Bacteria <prokaryotes>	5660	6272	6058
Thermodesulfobiaceae	Bacteria <prokaryotes>	313	438	880
Thermofilaceae	Archaea	442	686	890
Thermoflexaceae	Bacteria <prokaryotes>	189	458	599
Thermoflexibacter	Bacteria <prokaryotes>	253	460	318
Thermogemmatisporaceae	Bacteria <prokaryotes>	531	1129	1079
Thermoleophilaceae	Bacteria <prokaryotes>	838	1794	1403
Thermomicrobiaceae	Bacteria <prokaryotes>	589	1079	1047
Thermomonosporaceae	Bacteria <prokaryotes>	2444	4564	9299
Thermonemataceae	Bacteria <prokaryotes>	237	312	219
Thermopetrobacter	Bacteria <prokaryotes>	930	1459	2994
Thermoplasmataceae	Archaea	223	1432	194
Thermoproteaceae	Archaea	149	238	942
Thermorudis	Bacteria <prokaryotes>	345	498	1435
Thermosulfidibacter	Bacteria <prokaryotes>	508	968	1509
Thermotogaceae	Bacteria <prokaryotes>	2420	4410	6542
Thiobacillaceae	Bacteria <prokaryotes>	400	421	575
Thioflexothrix	Bacteria <prokaryotes>	758	1756	2337
Thiohalorhabdus	Bacteria <prokaryotes>	122	200	276
Thiolapillus	Bacteria <prokaryotes>	642	705	642
Thiotrichaceae	Bacteria <prokaryotes>	8739	15914	18232
Thoreaceae	Eukaryota	0	1	0
Thorectidae	Eukaryota	0	0	0
Thorselliaceae	Bacteria <prokaryotes>	161	136	149
Thraupidae	Eukaryota	0	1	2
Threskiornithidae	Eukaryota	0	0	0
Tilletiariaceae	Eukaryota	9	41	23
Timonella	Bacteria <prokaryotes>	568	1073	276
Tinamidae	Eukaryota	1	1	5
Tissierellaceae	Bacteria <prokaryotes>	684	667	1272
Togniniaceae	Eukaryota	5	8	3
Tolypothrichaceae	Bacteria <prokaryotes>	800	1499	1671
Tomitella	Bacteria <prokaryotes>	205	296	37
Toxariaceae	Eukaryota	8	0	1
Trachydiscus	Eukaryota	0	0	1
Trebouxiophyceae sp. MX-AZ01	Eukaryota	0	0	0
Tremellaceae	Eukaryota	16	4	14
Treubiaceae	Eukaryota	0	0	0
Trichechidae	Eukaryota	0	0	1
Trichinellidae	Eukaryota	103	198	220
Trichocomaceae	Eukaryota	19	20	72
Trichogrammatidae	Eukaryota	29	51	37
Tricholomataceae	Eukaryota	33	15	17
Trichomonadidae	Eukaryota	472	170	357
Trichomonascaceae	Eukaryota	781	1873	2519
Trichoplax	Eukaryota	321	409	829
Trichosarcina	Eukaryota	0	0	0
Trichosporonaceae	Eukaryota	108	48	60
Trigonalidae	Eukaryota	0	0	0
Trionychidae	Eukaryota	3	1	9
Triparmaceae	Eukaryota	3	1	8
Tristromaviridae	Viruses	0	0	3
Trochilidae	Eukaryota	3	20	3
Trogonidae	Eukaryota	0	0	0
Trombiculidae	Eukaryota	0	0	0
Tropheryma	Bacteria <prokaryotes>	3	1	14
Trueperaceae	Bacteria <prokaryotes>	824	1010	2079
Trypanosomatidae	Eukaryota	605	581	665
Tsukamurellaceae	Bacteria <prokaryotes>	72	100	186
Tsukubamonadidae	Eukaryota	0	0	0
Tuberaceae	Eukaryota	8	11	16
Tupaiidae	Eukaryota	6	0	2
Tytonidae	Eukaryota	15	2	0
Udoteaceae	Eukaryota	0	0	0
Ulmaridae	Eukaryota	0	0	0
Ulvaceae	Eukaryota	1	0	1
Unikaryonidae	Eukaryota	55	68	131
Unionidae	Eukaryota	0	0	0
Upogebiidae	Eukaryota	0	0	0
Urechidae	Eukaryota	0	0	0
Ursidae	Eukaryota	11	4	1
Ustilaginaceae	Eukaryota	122	245	61
Vahlkampfiidae	Eukaryota	378	630	408
Vanhorniidae	Eukaryota	0	0	0
Vaucheriaceae	Eukaryota	0	2	1
Veillonellaceae	Bacteria <prokaryotes>	1528	1773	2668
Ventosimonadaceae	Bacteria <prokaryotes>	40	43	85
Vermetidae	Eukaryota	0	0	0
Verrucariaceae	Eukaryota	2	0	18
Verrucomicrobia subdivision 3	Bacteria <prokaryotes>	810	1106	3025
Verrucomicrobiaceae	Bacteria <prokaryotes>	2461	2741	4279
Verrucomicrobiae bacterium DG1235	Bacteria <prokaryotes>	1125	1532	2583
Vertebrata <Metazoa>	Eukaryota	14	27	30
Vespertilionidae	Eukaryota	18	15	7
Vespidae	Eukaryota	7	21	26
Vibrio phage PWH3a-P1	Viruses	15	4	38
Vibrio phage VBM1	Viruses	112	12	23
Vibrio phage douglas 12A4	Viruses	1	22	14
Vibrio phage eugene 12A10	Viruses	1	0	1
Vibrio phage helene 12B3	Viruses	17	5	40
Vibrio phage henriette 12B8	Viruses	3	0	20
Vibrio phage qdvp001	Viruses	8	3	48
Vibrionaceae	Bacteria <prokaryotes>	69511	44811	57712
Viperidae	Eukaryota	9	5	4
Vitaceae	Eukaryota	12	4	11
Volvocaceae	Eukaryota	373	127	200
Vulgatibacteraceae	Bacteria <prokaryotes>	98	179	357
Waddliaceae	Bacteria <prokaryotes>	226	247	598
Wallemia	Eukaryota	74	33	129
Watanabea	Eukaryota	0	0	0
Welwitschiaceae	Eukaryota	0	0	0
Wenzhouxiangellaceae	Bacteria <prokaryotes>	900	1250	809
Williamsiaceae	Bacteria <prokaryotes>	71	42	165
Williamwhitmaniaceae	Bacteria <prokaryotes>	148	242	170
Woeseiaceae	Bacteria <prokaryotes>	3209	3158	5908
Wohlfahrtiimonas	Bacteria <prokaryotes>	810	665	1546
Wuhan spider virus 8	Viruses	0	0	0
Xanthobacteraceae	Bacteria <prokaryotes>	3123	3158	6769
Xanthomonadaceae	Bacteria <prokaryotes>	6033	3973	6551
Xenococcaceae	Bacteria <prokaryotes>	211	240	619
Xylochloris	Eukaryota	2	0	0
Xylonomycetaceae	Eukaryota	3	0	2
Yellowstone Lake virophage 5	Viruses	1003	127	49
Yellowstone Lake virophage 6	Viruses	103	50	240
Yellowstone Lake virophage 7	Viruses	283	40	37
Yersiniaceae	Bacteria <prokaryotes>	3121	1944	2634
Zetaproteobacteria bacterium TAG-1	Bacteria <prokaryotes>	388	757	841
Zoanthidae	Eukaryota	0	0	0
Zoogloeaceae	Bacteria <prokaryotes>	888	1055	2157
Zygnemataceae	Eukaryota	0	0	0
[Clostridium] ultunense	Bacteria <prokaryotes>	435	794	2082
archaeon enrichment culture clone 1(2010)	Archaea	0	1	1
bacterium 2013Arg42i	Bacteria <prokaryotes>	14	12	28
bacterium 2013Ark19i	Bacteria <prokaryotes>	8	9	35
bacterium A37T11	Bacteria <prokaryotes>	23	63	30
bacterium A52C2	Bacteria <prokaryotes>	1036	711	1943
bacterium JKG1	Bacteria <prokaryotes>	449	797	1023
bacterium LF-3	Bacteria <prokaryotes>	26	19	19
bacterium MS4	Bacteria <prokaryotes>	27	37	32
bacterium OL-1	Bacteria <prokaryotes>	9	9	55
bacterium SIT5	Bacteria <prokaryotes>	24	108	78
bacterium SIT6	Bacteria <prokaryotes>	11	71	80
bacterium endosymbiont of Pedicinus badii	Bacteria <prokaryotes>	126	92	181
dsDNA viruses, no RNA stage	Viruses	97	43	65
halophilic archaeon DL31	Archaea	7	23	16
leotiomyceta	Eukaryota	0	0	0
methanogenic archaeon ISO4-H5	Archaea	18	24	40
sulfur-oxidizing symbionts	Bacteria <prokaryotes>	7620	10626	10444
unclassified Actinobacteria (class)	Bacteria <prokaryotes>	11	15	13
unclassified Actinobacteria (class) (miscellaneous)	Bacteria <prokaryotes>	20634	41481	53448
unclassified Actinomycetales (miscellaneous)	Bacteria <prokaryotes>	17	45	12
unclassified Alphaproteobacteria	Bacteria <prokaryotes>	473	339	1319
unclassified Alphaproteobacteria (miscellaneous)	Bacteria <prokaryotes>	16207	15324	37449
unclassified Alteromonadales	Bacteria <prokaryotes>	720	920	2262
unclassified Bacillales	Bacteria <prokaryotes>	5	6	3
unclassified Bacilli (miscellaneous)	Bacteria <prokaryotes>	200	168	483
unclassified Bacteria	Bacteria <prokaryotes>	217	172	303
unclassified Bacteroidales	Bacteria <prokaryotes>	1	1	12
unclassified Bacteroidales (miscellaneous)	Bacteria <prokaryotes>	360	609	1104
unclassified Bacteroidetes (miscellaneous)	Bacteria <prokaryotes>	36	50	61
unclassified Bacteroidetes/Chlorobi group	Bacteria <prokaryotes>	589	772	620
unclassified Betaproteobacteria	Bacteria <prokaryotes>	31	49	31
unclassified Betaproteobacteria (miscellaneous)	Bacteria <prokaryotes>	21046	14047	15412
unclassified Burkholderiales	Bacteria <prokaryotes>	121	238	179
unclassified Burkholderiales (miscellaneous)	Bacteria <prokaryotes>	244	244	420
unclassified Caudovirales	Viruses	19653	9323	7203
unclassified Chalmydiales (miscellaneous)	Bacteria <prokaryotes>	367	547	518
unclassified Clostridia (miscellaneous)	Bacteria <prokaryotes>	184	172	648
unclassified Clostridiales	Bacteria <prokaryotes>	71	121	87
unclassified Clostridiales (miscellaneous)	Bacteria <prokaryotes>	2757	4252	4726
unclassified Coriobacteriales	Bacteria <prokaryotes>	45	50	11
unclassified Cyanobacteria	Bacteria <prokaryotes>	6	29	2
unclassified Cyanobacteria (miscellaneous)	Bacteria <prokaryotes>	539	1146	1451
unclassified Deltaproteobacteria	Bacteria <prokaryotes>	9	10	39
unclassified Deltaproteobacteria (miscellaneous)	Bacteria <prokaryotes>	1014	1882	2154
unclassified Firmicutes sensu stricto (miscellaneous)	Bacteria <prokaryotes>	111	156	337
unclassified Flavobacteriales (miscellaneous)	Bacteria <prokaryotes>	296	288	217
unclassified Frankiales (miscellaneous)	Bacteria <prokaryotes>	670	763	1130
unclassified Gammaproteobacteria	Bacteria <prokaryotes>	377	857	755
unclassified Gammaproteobacteria (miscellaneous)	Bacteria <prokaryotes>	3788	3460	8174
unclassified Halobacteriales (miscellaneous)	Archaea	3	16	3
unclassified Micrococcales (miscellaneous)	Bacteria <prokaryotes>	119	367	125
unclassified Nitrosomonadales	Bacteria <prokaryotes>	255	404	471
unclassified Nostocales (miscellaneous)	Bacteria <prokaryotes>	246	541	252
unclassified Oscillatoriales	Bacteria <prokaryotes>	0	0	0
unclassified Oscillatoriales (miscellaneous)	Bacteria <prokaryotes>	183	291	365
unclassified Rhizobiales	Bacteria <prokaryotes>	177	258	326
unclassified Rhizobiales (miscellaneous)	Bacteria <prokaryotes>	4687	1294	2282
unclassified Rhodobacterales	Bacteria <prokaryotes>	1559	2180	8417
unclassified Rhodospirillales	Bacteria <prokaryotes>	10	18	35
unclassified Rhodospirillales (miscellaneous)	Bacteria <prokaryotes>	6318	8320	14730
unclassified Rickettsiales (miscellaneous)	Bacteria <prokaryotes>	1408	3086	5051
unclassified Solirubrobacterales	Bacteria <prokaryotes>	602	1466	1868
unclassified Sphingobacteriales	Bacteria <prokaryotes>	23	14	52
unclassified Sphingobacteriales (miscellaneous)	Bacteria <prokaryotes>	548	326	864
unclassified Sphingomonadales	Bacteria <prokaryotes>	208	250	350
unclassified Thaumarchaeota	Archaea	163	972	27938
unclassified Thaumarchaeota (miscellaneous)	Archaea	92	525	20751
unclassified Thermoplasmatales (miscellaneous)	Archaea	5	10	28
unclassified Thiotrichales	Bacteria <prokaryotes>	2	0	6
unclassified Tissierellia (miscellaneous)	Bacteria <prokaryotes>	72	50	227
unclassified Verrucomicrobia	Bacteria <prokaryotes>	119	174	1462
unclassified Verrucomicrobia (miscellaneous)	Bacteria <prokaryotes>	17604	15304	87335
unclassified Vibrionales	Bacteria <prokaryotes>	24	16	72
unclassified pseudomonads	Bacteria <prokaryotes>	2	18	8
uncultured Termite group 1 bacterium	Bacteria <prokaryotes>	44	79	40
uncultured bacterium	Bacteria <prokaryotes>	0	0	0
uncultured bacterium AST3	Bacteria <prokaryotes>	0	0	0
uncultured bacterium BLR3	Bacteria <prokaryotes>	0	0	1
uncultured bacterium BLR9	Bacteria <prokaryotes>	0	0	0
uncultured bacterium HH1107	Bacteria <prokaryotes>	0	0	0
uncultured bacterium pMCBF6	Bacteria <prokaryotes>	0	0	1
uncultured crAssphage	Viruses	14	2	24

## Sheet: Viruses
Family	Domain	HOT297_75m	Falkor_100m	HOT297_125m	Falkor_250m	HOT297_500m
Abalone shriveling syndrome-associated virus	Viruses	23	15	24	22	1
Acanthamoebidae	Eukaryota	661	641	860	945	2200
Acanthasteridae	Eukaryota	165	89	129	186	116
Acanthisittidae	Eukaryota	0	0	0	0	0
Acanthogorgiidae	Eukaryota	0	0	0	0	0
Acaryochloridaceae	Bacteria <prokaryotes>	325	457	721	331	665
Accipitridae	Eukaryota	0	0	0	0	0
Acerentomidae	Eukaryota	0	0	0	0	0
Acetobacteraceae	Bacteria <prokaryotes>	15248	14402	15188	16080	18621
Acholeplasmataceae	Bacteria <prokaryotes>	232	374	587	137	231
Acidaminococcaceae	Bacteria <prokaryotes>	492	444	467	1153	1163
Acidibacillus	Bacteria <prokaryotes>	21	9	10	84	235
Acidiferrobacteraceae	Bacteria <prokaryotes>	95	50	66	57	21
Acidilobaceae	Archaea	147	211	260	62	23
Acidimicrobiaceae	Bacteria <prokaryotes>	2501	617	2251	535	2325
Acidithiobacillaceae	Bacteria <prokaryotes>	1508	1965	3369	1899	2112
Acidobacteriaceae	Bacteria <prokaryotes>	3200	2525	3065	4118	5793
Acidothermaceae	Bacteria <prokaryotes>	138	236	222	20	15
Aciduliprofundum	Archaea	720	423	651	200	406
Acinetosporaceae	Eukaryota	0	0	0	0	0
Acroporidae	Eukaryota	438	342	580	333	169
Actiniidae	Eukaryota	0	0	0	0	0
Actinobacteria bacterium IMCC19121	Bacteria <prokaryotes>	5	6	10	1	10
Actinobacteria bacterium IMCC25003	Bacteria <prokaryotes>	18	10	19	10	50
Actinobacteria bacterium IMCC26077	Bacteria <prokaryotes>	72	16	64	4	141
Actinobacteria bacterium IMCC26103	Bacteria <prokaryotes>	190	82	126	40	172
Actinomycetaceae	Bacteria <prokaryotes>	765	605	996	1057	1252
Actinopolysporaceae	Bacteria <prokaryotes>	157	142	202	110	260
Actinospicaceae	Bacteria <prokaryotes>	18	15	11	1	2
Acytostelium	Eukaryota	74	44	43	306	285
Adenoviridae	Viruses	28	12	22	18	58
Adrianichthyidae	Eukaryota	10	6	2	3	9
Aerococcaceae	Bacteria <prokaryotes>	525	336	508	579	812
Aeromonadaceae	Bacteria <prokaryotes>	2737	2003	2179	3399	3791
Aeropyrum pernix spindle-shaped virus 1	Viruses	0	0	0	0	0
Agamidae	Eukaryota	2	1	0	1	82
Agaonidae	Eukaryota	6	1	1	6	31
Agaraceae	Eukaryota	0	0	0	0	0
Agaricaceae	Eukaryota	23	5	13	1	14
Ahnfeltiaceae	Eukaryota	0	0	0	0	0
Aiptasiidae	Eukaryota	313	218	297	350	375
Ajellomycetaceae	Eukaryota	0	0	0	1	0
Akkermansiaceae	Bacteria <prokaryotes>	841	633	1021	806	890
Alariaceae	Eukaryota	0	0	0	0	0
Alcaligenaceae	Bacteria <prokaryotes>	21406	19124	21151	25090	29789
Alcanivoracaceae	Bacteria <prokaryotes>	968	4156	1796	1687	1341
Alcyoniidae	Eukaryota	0	0	0	0	0
Aleyrodidae	Eukaryota	66	21	66	16	16
Algiphilaceae	Bacteria <prokaryotes>	646	933	868	3467	1932
Alicyclobacillaceae	Bacteria <prokaryotes>	2744	2383	3318	4301	5073
Alkalimonas	Bacteria <prokaryotes>	99	117	145	43	71
Alligatoridae	Eukaryota	0	2	3	28	17
Alloherpesviridae	Viruses	0	0	0	0	3
Alteromonadaceae	Bacteria <prokaryotes>	11788	185674	10715	50443	19328
Amborellaceae	Eukaryota	10	9	22	43	96
Amoebophilaceae	Bacteria <prokaryotes>	147	193	367	104	26
Amphibolidae	Eukaryota	0	0	0	0	0
Anaerocellum group	Bacteria <prokaryotes>	5	1	4	0	5
Anaerolineaceae	Bacteria <prokaryotes>	2000	1418	2116	4170	5621
Anaeromyxobacteraceae	Bacteria <prokaryotes>	888	743	848	1072	1497
Anaerovirgula	Bacteria <prokaryotes>	62	61	44	118	574
Anaplasmataceae	Bacteria <prokaryotes>	2340	2211	2527	3914	2772
Anatidae	Eukaryota	18	20	11	8	2
Ancylostomatidae	Eukaryota	10	17	33	49	105
Andalucia	Eukaryota	0	0	0	0	0
Andrognathidae	Eukaryota	0	0	0	0	0
Aneuraceae	Eukaryota	0	0	0	0	0
Anisakidae	Eukaryota	0	0	0	0	0
Aotidae	Eukaryota	0	0	0	0	0
Aphalaridae	Eukaryota	0	0	0	0	0
Aphanizomenonaceae	Bacteria <prokaryotes>	1076	960	942	526	780
Aphanothecaceae	Bacteria <prokaryotes>	571	414	346	277	416
Aphididae	Eukaryota	106	46	37	100	171
Apiaceae	Eukaryota	46	58	49	164	75
Apidae	Eukaryota	81	42	89	280	408
Apis mellifera filamentous virus	Viruses	0	0	0	0	0
Aplysiidae	Eukaryota	86	62	92	69	68
Aplysinidae	Eukaryota	0	0	0	0	0
Apodidae	Eukaryota	0	0	0	1	0
Apterygidae	Eukaryota	1	1	2	1	0
Apusomonadidae	Eukaryota	222	136	379	184	619
Aquificaceae	Bacteria <prokaryotes>	2709	3061	4835	2759	3461
Archaeoglobaceae	Archaea	4219	5069	5132	4559	5410
Archangiaceae	Bacteria <prokaryotes>	2253	1409	2752	1707	2166
Ardeidae	Eukaryota	1	0	0	0	0
Ardenticatenaceae	Bacteria <prokaryotes>	715	560	1212	939	2038
Arecaceae	Eukaryota	118	224	206	726	760
Armatimonadetes bacterium DC	Bacteria <prokaryotes>	67	47	139	270	141
Armatimonadetes bacterium GBS	Bacteria <prokaryotes>	0	1	2	0	0
Armatimonadetes bacterium GXS	Bacteria <prokaryotes>	4	0	11	2	5
Arthrodermataceae	Eukaryota	2	7	0	0	3
Ascoideaceae	Eukaryota	0	1	1	43	19
Ascoviridae	Viruses	31	12	30	7	9
Asfarviridae	Viruses	3	1	2	13	12
Asparagaceae	Eukaryota	6	4	5	6	36
Aspergillaceae	Eukaryota	28	30	5	27	77
Asteraceae	Eukaryota	114	86	67	141	93
Athyriaceae	Eukaryota	0	0	0	0	0
Atopobiaceae	Bacteria <prokaryotes>	450	572	1488	754	501
Atribacteria bacterium JGI 0000014-F07	Bacteria <prokaryotes>	62	22	54	90	111
Aulacidae	Eukaryota	0	0	0	0	0
Aurantimonadaceae	Bacteria <prokaryotes>	13130	10124	9035	8893	8525
Aureococcus	Eukaryota	784	1088	297	1132	1072
Aureoumbra	Eukaryota	69	25	9	0	6
Auriculariaceae	Eukaryota	4	6	4	11	51
Azonexaceae	Bacteria <prokaryotes>	624	621	594	594	553
Babesiidae	Eukaryota	402	204	56	18	76
Bacillaceae	Bacteria <prokaryotes>	41122	35979	50330	46221	60066
Bacillales Family X. Incertae Sedis	Bacteria <prokaryotes>	119	32	97	47	180
Bacillales Family XI. Incertae Sedis	Bacteria <prokaryotes>	212	67	184	45	139
Bacillales Family XII. Incertae Sedis	Bacteria <prokaryotes>	273	151	258	195	291
Bacillariaceae	Eukaryota	12	8	5	2	4
Bacillus phage BalMu-1	Viruses	5	0	3	0	0
Bacteriovoracaceae	Bacteria <prokaryotes>	2420	1778	2677	1515	2175
Bacteroidaceae	Bacteria <prokaryotes>	7012	7624	10030	7107	10276
Baculoviridae	Viruses	28	20	48	27	15
Balaenopteridae	Eukaryota	0	0	0	0	1
Balneolaceae	Bacteria <prokaryotes>	2415	2704	3621	1185	2017
Bangiaceae	Eukaryota	0	0	1	3	4
Barnesiellaceae	Bacteria <prokaryotes>	47	80	21	37	32
Bartonellaceae	Bacteria <prokaryotes>	8980	6426	2881	2260	2701
Bathycoccaceae	Eukaryota	1104	1207	1790	2896	3170
Bathyergidae	Eukaryota	2	35	25	21	75
Batrachochytrium	Eukaryota	4	6	5	10	12
Batrachospermaceae	Eukaryota	0	2	0	0	2
Bauldia	Bacteria <prokaryotes>	358	326	384	978	734
Bdellovibrionaceae	Bacteria <prokaryotes>	8920	8234	9628	5511	7152
Beihai weivirus-like virus 4	Viruses	0	0	0	0	0
Beijerinckiaceae	Bacteria <prokaryotes>	1217	1483	1252	1889	2533
Berkeleyaceae	Eukaryota	0	0	0	0	0
Bernardetiaceae	Bacteria <prokaryotes>	376	304	424	279	259
Beutenbergiaceae	Bacteria <prokaryotes>	0	0	0	0	0
Bicaudaviridae	Viruses	0	0	0	0	7
Bifidobacteriaceae	Bacteria <prokaryotes>	1293	1261	2460	1351	2052
Bifurcata	Eukaryota	0	0	0	0	0
Bigelowiella	Eukaryota	0	0	0	0	0
Blastocladiaceae	Eukaryota	0	0	0	0	0
Blastocystis	Eukaryota	537	296	383	457	547
Blattabacteriaceae	Bacteria <prokaryotes>	415	386	252	206	257
Boldiaceae	Eukaryota	1	0	0	3	4
Bolinopsidae	Eukaryota	0	0	0	0	0
Bombycidae	Eukaryota	102	60	120	41	138
Bondarzewiaceae	Eukaryota	1	3	3	0	5
Bonnemaisoniaceae	Eukaryota	0	0	0	0	0
Borreliaceae	Bacteria <prokaryotes>	693	186	647	315	582
Bostrichidae	Eukaryota	0	0	0	0	0
Botryococcaceae	Eukaryota	0	0	0	0	0
Botryosphaeriaceae	Eukaryota	28	12	28	1	4
Bovidae	Eukaryota	37	34	23	22	52
Brachyspiraceae	Bacteria <prokaryotes>	748	708	1107	882	927
Braconidae	Eukaryota	103	93	108	114	24
Bracteacoccaceae	Eukaryota	0	0	0	0	0
Bradyrhizobiaceae	Bacteria <prokaryotes>	38440	43257	43403	53012	64642
Branchiostomidae	Eukaryota	745	603	382	297	336
Brassicaceae	Eukaryota	377	311	281	241	475
Brevibacteriaceae	Bacteria <prokaryotes>	410	279	311	304	922
Brevinemataceae	Bacteria <prokaryotes>	221	91	100	64	65
Bromeliaceae	Eukaryota	9	9	9	48	63
Brucella phage BiPBO1	Viruses	5	3	0	0	1
Brucellaceae	Bacteria <prokaryotes>	3235	3105	4056	3413	4121
Bryobacteraceae	Bacteria <prokaryotes>	136	337	232	241	343
Bryopsidaceae	Eukaryota	0	0	0	0	0
Bucerotidae	Eukaryota	0	0	0	0	0
Budviciaceae	Bacteria <prokaryotes>	97	160	78	117	192
Buprestidae	Eukaryota	41	16	27	4	15
Burkholderiaceae	Bacteria <prokaryotes>	61859	52777	52916	57391	63784
Burkholderiales Genera incertae sedis	Bacteria <prokaryotes>	3396	2818	3091	2933	3887
Caedibacter	Bacteria <prokaryotes>	3018	3941	2322	3528	3222
Caenogastropoda	Eukaryota	0	0	0	0	0
Calanidae	Eukaryota	0	0	0	0	0
Caldicoprobacteraceae	Bacteria <prokaryotes>	1000	1222	998	546	331
Caldilineaceae	Bacteria <prokaryotes>	257	113	145	502	219
Caldisericaceae	Bacteria <prokaryotes>	437	222	208	134	273
Caldisphaeraceae	Archaea	2	0	4	0	4
Calditrichaceae	Bacteria <prokaryotes>	3467	2677	2780	1035	2332
Callorhinchidae	Eukaryota	58	27	38	37	43
Callyspongiidae	Eukaryota	0	0	0	0	0
Cambaridae	Eukaryota	0	0	0	0	0
Camelidae	Eukaryota	74	55	72	47	18
Campanulaceae	Eukaryota	1	0	1	1	0
Campanulariidae	Eukaryota	0	0	0	0	0
Campylobacteraceae	Bacteria <prokaryotes>	20529	19198	21425	22737	31641
Candidatus Accumulibacter	Bacteria <prokaryotes>	16	3	5	4	7
Candidatus Azobacteroides	Bacteria <prokaryotes>	44	17	53	72	84
Candidatus Babela	Bacteria <prokaryotes>	168	40	73	61	209
Candidatus Baumannia	Bacteria <prokaryotes>	4	5	19	4	28
Candidatus Brocadiaceae	Bacteria <prokaryotes>	2825	3480	5884	2338	3580
Candidatus Chrysopegis	Bacteria <prokaryotes>	444	145	232	265	566
Candidatus Cloacimonas	Bacteria <prokaryotes>	308	243	398	205	455
Candidatus Desulfofervidaceae	Bacteria <prokaryotes>	331	265	319	275	448
Candidatus Entotheonella	Bacteria <prokaryotes>	1294	1252	3478	1223	1989
Candidatus Hepatobacter	Bacteria <prokaryotes>	16	61	65	5	3
Candidatus Izimaplasma	Bacteria <prokaryotes>	6	15	6	11	52
Candidatus Korarchaeum	Archaea	62	60	47	31	106
Candidatus Kryptobacter	Bacteria <prokaryotes>	208	141	210	140	338
Candidatus Kryptonium	Bacteria <prokaryotes>	301	117	226	291	596
Candidatus Methanoperedenaceae	Archaea	1118	547	389	435	597
Candidatus Micrarchaeota archaeon Mia14	Archaea	144	69	66	14	27
Candidatus Midichloriaceae	Bacteria <prokaryotes>	79	39	34	120	39
Candidatus Nanopelagicus	Bacteria <prokaryotes>	159	27	133	17	130
Candidatus Nasuia	Bacteria <prokaryotes>	7	3	7	3	6
Candidatus Nitrosopelagicus	Archaea	725	618	1746	726	4638
Candidatus Nitrosotenuis	Archaea	176	179	259	273	1662
Candidatus Nucleicultrix	Bacteria <prokaryotes>	317	271	153	131	728
Candidatus Paracaedibacteraceae	Bacteria <prokaryotes>	1917	1883	2316	1242	1034
Candidatus Planktophila	Bacteria <prokaryotes>	593	389	575	258	732
Candidatus Profftella	Bacteria <prokaryotes>	4	3	13	1	1
Candidatus Ruthia	Bacteria <prokaryotes>	468	434	721	76	143
Candidatus Saccharibacteria oral taxon TM7x	Bacteria <prokaryotes>	29	20	8	24	66
Candidatus Sulcia	Bacteria <prokaryotes>	23	29	56	155	178
Candidatus Symbiothrix	Bacteria <prokaryotes>	102	47	75	6	17
Candidatus Thiodiazotropha	Bacteria <prokaryotes>	628	853	1096	1104	855
Candidatus Thioglobus	Bacteria <prokaryotes>	662	336	773	508	1371
Candidatus Tremblaya	Bacteria <prokaryotes>	0	0	0	0	0
Candidatus Walczuchella	Bacteria <prokaryotes>	1324	1477	1024	439	570
Candidatus Xiphinematobacter	Bacteria <prokaryotes>	35	44	23	31	117
Canidae	Eukaryota	0	0	0	0	0
Caprimulgidae	Eukaryota	0	0	0	0	0
Capsaspora	Eukaryota	261	170	251	173	252
Cardiobacteriaceae	Bacteria <prokaryotes>	148	99	170	325	481
Cariamidae	Eukaryota	0	0	0	0	0
Caricaceae	Eukaryota	3	0	2	1	3
Carnobacteriaceae	Bacteria <prokaryotes>	1254	1284	1869	1639	1482
Carteria	Eukaryota	0	0	0	0	0
Caryophyllaceae	Eukaryota	0	0	0	0	0
Caryophylliidae	Eukaryota	0	0	0	0	0
Castoridae	Eukaryota	1	2	0	0	2
Catabacteriaceae	Bacteria <prokaryotes>	12	1	12	103	68
Catalimonadaceae	Bacteria <prokaryotes>	779	741	587	261	263
Catenulisporaceae	Bacteria <prokaryotes>	54	252	215	274	999
Caulerpaceae	Eukaryota	7	1	6	1	6
Caulobacteraceae	Bacteria <prokaryotes>	9991	8968	9653	12065	13092
Caviidae	Eukaryota	0	0	3	2	0
Cebidae	Eukaryota	4	1	2	36	66
Cecidomyiidae	Eukaryota	0	0	0	0	0
Cellulomonadaceae	Bacteria <prokaryotes>	291	349	433	809	1197
Cellulophaga phage phi48:2	Viruses	20	9	30	18	20
Cellvibrionaceae	Bacteria <prokaryotes>	3679	3720	2923	4006	4987
Centropomidae	Eukaryota	19	4	8	9	6
Cephidae	Eukaryota	11	12	4	5	14
Cerambycidae	Eukaryota	11	7	11	4	10
Ceramiaceae	Eukaryota	0	0	0	0	0
Cercopithecidae	Eukaryota	7	8	14	18	47
Cervidae	Eukaryota	0	0	0	0	0
Chaetocerotaceae	Eukaryota	0	0	1	0	0
Chaetomiaceae	Eukaryota	3	3	5	1	19
Chaetopeltidaceae	Eukaryota	0	0	0	0	0
Chaetosphaeridiaceae	Eukaryota	0	0	0	0	0
Chamaesiphonaceae	Bacteria <prokaryotes>	128	176	168	92	237
Chamaetrichon	Eukaryota	0	0	0	0	1
Champiaceae	Eukaryota	0	0	1	0	0
Characeae	Eukaryota	0	0	0	0	0
Characidae	Eukaryota	133	35	25	32	33
Charadriidae	Eukaryota	0	0	0	0	0
Chattonellaceae	Eukaryota	0	0	4	0	1
Cheirogaleidae	Eukaryota	1	1	6	0	2
Chelatococcaceae	Bacteria <prokaryotes>	6259	3773	3915	3675	4970
Cheloniidae	Eukaryota	23	4	14	0	3
Chenopodiaceae	Eukaryota	96	68	122	31	84
Chinchillidae	Eukaryota	0	0	0	0	1
Chironomidae	Eukaryota	0	0	0	0	0
Chitinivibrionaceae	Bacteria <prokaryotes>	45	7	64	46	48
Chitinophagaceae	Bacteria <prokaryotes>	9028	9994	10748	8603	8626
Chlamydiaceae	Bacteria <prokaryotes>	3138	1396	2416	730	1209
Chlamydomonadaceae	Eukaryota	177	74	75	39	261
Chloracidobacterium	Bacteria <prokaryotes>	220	172	324	128	177
Chlorellaceae	Eukaryota	358	156	262	94	236
Chlorobiaceae	Bacteria <prokaryotes>	3495	2776	3422	3882	4916
Chlorodendraceae	Eukaryota	1	0	0	1	1
Chloroflexaceae	Bacteria <prokaryotes>	252	121	282	321	576
Chlorogloeopsidaceae	Bacteria <prokaryotes>	239	146	96	99	159
Chlorokybaceae	Eukaryota	0	0	0	0	0
Chondrillidae	Eukaryota	0	0	0	0	0
Chordariaceae	Eukaryota	0	0	1	0	0
Choreocolacaceae	Eukaryota	0	0	0	0	0
Christensenellaceae	Bacteria <prokaryotes>	270	164	192	166	497
Chromatiaceae	Bacteria <prokaryotes>	4688	3325	4056	5411	6417
Chromobacteriaceae	Bacteria <prokaryotes>	5267	4358	4703	5323	6033
Chromochloridaceae	Eukaryota	0	0	0	0	0
Chromulinaceae	Eukaryota	0	0	0	0	0
Chroococcaceae	Bacteria <prokaryotes>	1956	1227	1397	570	1088
Chroococcidiopsidaceae	Bacteria <prokaryotes>	160	159	280	44	180
Chroomonadaceae	Eukaryota	0	2	1	0	0
Chryseolinea	Bacteria <prokaryotes>	1481	1194	1139	1332	2307
Chrysiogenaceae	Bacteria <prokaryotes>	262	189	391	391	215
Chrysobalanaceae	Eukaryota	0	0	0	0	0
Chrysochloridae	Eukaryota	82	77	34	5	5
Chrysopidae	Eukaryota	0	0	0	0	0
Chthoniobacteraceae	Bacteria <prokaryotes>	1613	944	1805	1383	1977
Chthonomonadaceae	Bacteria <prokaryotes>	427	233	383	469	330
Cicadellidae	Eukaryota	0	0	0	0	0
Cichlidae	Eukaryota	11	6	17	66	26
Cimicidae	Eukaryota	27	13	21	2	10
Cionidae	Eukaryota	12	9	37	7	55
Circoviridae	Viruses	0	0	0	0	0
Circovirus-like genome RW-C	Viruses	0	0	0	0	0
Circovirus-like genome SAR-A	Viruses	0	0	0	0	0
Clavicipitaceae	Eukaryota	6	14	12	30	9
Cleomaceae	Eukaryota	30	11	24	30	70
Closteriaceae	Eukaryota	0	0	0	0	0
Clostridiaceae	Bacteria <prokaryotes>	23982	21291	27985	24882	34571
Clostridiales Family XII. Incertae Sedis	Bacteria <prokaryotes>	132	879	930	1388	1757
Clostridiales Family XIII. Incertae Sedis	Bacteria <prokaryotes>	404	292	525	258	502
Clostridiales Family XVI. Incertae Sedis	Bacteria <prokaryotes>	342	427	386	345	449
Clostridiales Family XVII. Incertae Sedis	Bacteria <prokaryotes>	820	936	2915	1573	1637
Clostridium phage phiCT19406C	Viruses	0	6	1	1	1
Clostridium phage phiCT453A	Viruses	8	3	15	1	0
Clostridium phage phiCTC2A	Viruses	34	82	209	22	3
Clupeidae	Eukaryota	394	308	264	21	10
Coccidioides	Eukaryota	3	0	4	1	2
Coccomyxaceae	Eukaryota	189	208	156	302	117
Coelacanthidae	Eukaryota	13	46	13	14	19
Cohaesibacteraceae	Bacteria <prokaryotes>	354	288	250	565	535
Coleochaetaceae	Eukaryota	0	0	0	0	0
Coleofasciculaceae	Bacteria <prokaryotes>	480	650	556	518	872
Coliidae	Eukaryota	0	0	0	0	0
Colletidae	Eukaryota	0	0	0	0	0
Collodictyonidae	Eukaryota	0	0	0	0	1
Colubridae	Eukaryota	2	1	8	0	0
Columbidae	Eukaryota	0	0	0	0	0
Colwelliaceae	Bacteria <prokaryotes>	1465	1211	1429	1231	1619
Comamonadaceae	Bacteria <prokaryotes>	31623	27912	23869	19575	25988
Competibacteraceae	Bacteria <prokaryotes>	2057	1640	1832	1821	2445
Compsopogonaceae	Eukaryota	2	1	1	2	1
Conexibacteraceae	Bacteria <prokaryotes>	1040	819	1042	763	948
Conidae	Eukaryota	0	0	0	0	0
Coniophoraceae	Eukaryota	44	15	16	6	8
Coniosporium <Dothideomycetes incertae sedis>	Eukaryota	0	5	1	3	4
Convolvulaceae	Eukaryota	1	3	1	50	86
Corallinaceae	Eukaryota	0	0	0	0	0
Cordycipitaceae	Eukaryota	33	24	54	241	47
Coriobacteriaceae	Bacteria <prokaryotes>	347	505	530	458	605
Corvidae	Eukaryota	6	0	5	0	0
Corydalidae	Eukaryota	0	0	0	0	0
Corynebacteriaceae	Bacteria <prokaryotes>	2082	1558	2382	1696	2367
Coscinodiscaceae	Eukaryota	0	0	0	0	0
Coxiellaceae	Bacteria <prokaryotes>	976	843	1149	896	1362
Crambidae	Eukaryota	0	0	0	0	0
Crenotrichaceae	Bacteria <prokaryotes>	291	176	333	291	171
Criblamydiaceae	Bacteria <prokaryotes>	127	109	255	83	196
Cricetidae	Eukaryota	0	2	0	1	1
Crocinitomicaceae	Bacteria <prokaryotes>	1039	854	991	738	1536
Crocodylidae <all crocodiles>	Eukaryota	3	6	0	1	12
Cryomorphaceae	Bacteria <prokaryotes>	658	514	403	304	396
Cryptococcaceae	Eukaryota	77	85	107	393	678
Cryptomonadaceae	Eukaryota	2	3	0	2	4
Cryptosporangiaceae	Bacteria <prokaryotes>	126	8	26	83	218
Cryptosporidiidae	Eukaryota	66	63	38	22	44
Ctenophore-associated circular virus 4	Viruses	0	0	0	0	0
Cuculidae	Eukaryota	0	0	0	0	0
Cucurbitaceae	Eukaryota	70	57	72	134	176
Culex mononega-like virus 2	Viruses	0	0	0	0	0
Culicidae	Eukaryota	130	55	92	69	127
Cuniculiplasmataceae	Archaea	14	3	6	16	18
Cuniculitremaceae	Eukaryota	24	27	11	11	10
Cupressaceae	Eukaryota	0	0	0	5	2
Curculionidae	Eukaryota	35	62	55	43	103
Cyanidiaceae	Eukaryota	179	93	148	96	223
Cyanobacteriaceae	Bacteria <prokaryotes>	1652	1125	498	63	173
Cyanophage KBS-P-1A	Viruses	3078	1450	1183	383	141
Cyanophage KBS-S-2A	Viruses	19964	17671	14835	2662	1567
Cyanophage MED4-117	Viruses	40484	20342	8296	1340	924
Cyanophage Syn30	Viruses	5791	8070	5130	1972	1555
Cyanophoraceae	Eukaryota	0	0	0	0	1
Cyanoptyche	Eukaryota	0	0	0	0	0
Cyanothecaceae	Bacteria <prokaryotes>	2667	2085	2349	1761	1947
Cyclobacteriaceae	Bacteria <prokaryotes>	2096	1767	2880	1390	2230
Cyclopettidae	Eukaryota	0	0	0	0	0
Cymbomonas	Eukaryota	0	0	0	0	0
Cynocephalidae	Eukaryota	1	4	0	1	10
Cynoglossidae	Eukaryota	0	0	1	3	7
Cyphellophoraceae	Eukaryota	18	1	0	0	2
Cypridinidae	Eukaryota	0	0	0	0	0
Cyprinidae	Eukaryota	35	17	9	32	54
Cyprinodontidae	Eukaryota	10	8	8	1	0
Cytophagaceae	Bacteria <prokaryotes>	12015	11168	13782	7784	11527
Dacryobolaceae	Eukaryota	0	0	0	0	0
Dactyloidae	Eukaryota	2	1	1	1	1
Daphniidae	Eukaryota	0	0	0	0	0
Dasyaceae	Eukaryota	0	0	0	0	0
Dasypodidae	Eukaryota	0	0	0	0	0
Dasyuridae	Eukaryota	40	19	28	11	13
Debaryomycetaceae	Eukaryota	114	38	73	20	45
Deep-sea thermophilic phage D6E	Viruses	21	16	24	15	11
Deferribacteraceae	Bacteria <prokaryotes>	10270	10003	6534	6663	5871
Deferrisoma	Bacteria <prokaryotes>	1826	1774	3179	1259	1976
Defluviitaleaceae	Bacteria <prokaryotes>	59	29	72	36	204
Defluviitoga	Bacteria <prokaryotes>	48	26	63	19	95
Dehalococcoidaceae	Bacteria <prokaryotes>	1000	1503	1585	2888	3946
Dehalogenimonas	Bacteria <prokaryotes>	194	424	1233	1105	443
Deinococcaceae	Bacteria <prokaryotes>	3256	1753	2574	1559	2951
Delesseriaceae	Eukaryota	2	1	2	2	3
Delphacidae	Eukaryota	31	12	37	5	47
Delphinidae	Eukaryota	0	0	0	0	0
Demequinaceae	Bacteria <prokaryotes>	182	146	207	732	349
Demodicidae	Eukaryota	0	0	0	0	0
Dermabacteraceae	Bacteria <prokaryotes>	384	198	231	150	340
Dermacoccaceae	Bacteria <prokaryotes>	157	238	191	332	427
Dermateaceae	Eukaryota	221	144	52	0	14
Dermatophilaceae	Bacteria <prokaryotes>	31	14	13	29	81
Dermocarpellaceae	Bacteria <prokaryotes>	147	72	150	75	116
Desertifilaceae	Bacteria <prokaryotes>	100	53	88	51	115
Desmarestiaceae	Eukaryota	0	0	0	0	0
Desulfarculaceae	Bacteria <prokaryotes>	1946	2359	3765	3343	5382
Desulfobacteraceae	Bacteria <prokaryotes>	22427	19393	23095	22693	23147
Desulfobulbaceae	Bacteria <prokaryotes>	2217	1872	2201	2756	3182
Desulfohalobiaceae	Bacteria <prokaryotes>	744	809	1115	728	1120
Desulfomicrobiaceae	Bacteria <prokaryotes>	683	308	787	495	1448
Desulfonatronaceae	Bacteria <prokaryotes>	159	108	189	287	249
Desulfovibrionaceae	Bacteria <prokaryotes>	51455	39596	40403	36049	40541
Desulfurellaceae	Bacteria <prokaryotes>	595	320	928	229	473
Desulfuribacillus	Bacteria <prokaryotes>	91	62	95	45	127
Desulfurobacteriaceae	Bacteria <prokaryotes>	1383	1092	1255	718	1210
Desulfurococcaceae	Archaea	389	295	247	215	551
Desulfuromonadaceae	Bacteria <prokaryotes>	4455	3535	4089	4656	7608
Dethiosulfatibacter	Bacteria <prokaryotes>	15	22	34	76	56
Diatrypaceae	Eukaryota	16	9	19	8	24
Dicloster	Eukaryota	0	0	0	0	0
Dicroglossidae	Eukaryota	4	6	5	3	17
Dictyoglomaceae	Bacteria <prokaryotes>	1736	557	1533	660	1513
Dictyostelium	Eukaryota	709	639	913	1716	3219
Dictyotaceae	Eukaryota	0	0	0	0	0
Didelphidae	Eukaryota	0	2	3	1	1
Didymosphaeriaceae	Eukaryota	9	7	4	1	10
Dietziaceae	Bacteria <prokaryotes>	8	0	16	12	54
Dipodascaceae	Eukaryota	8	4	4	8	10
Dipodidae	Eukaryota	0	0	0	0	0
Diprionidae	Eukaryota	53	24	37	9	5
Dissulfuribacter	Bacteria <prokaryotes>	223	188	327	105	120
Ditrysia	Eukaryota	17	4	13	2	0
Dixoniellaceae	Eukaryota	6	0	6	3	12
Dragonfly cyclicusvirus	Viruses	0	0	0	0	0
Dragonfly larvae associated circular virus-10	Viruses	0	0	0	0	0
Drosophilidae	Eukaryota	268	205	327	589	1193
Dunaliella viridis virus SI2	Viruses	405	431	856	741	3577
Dunaliellaceae	Eukaryota	0	0	0	0	0
Dysgonamonadaceae	Bacteria <prokaryotes>	964	676	1201	1046	1105
Ectocarpaceae	Eukaryota	0	0	0	0	0
Ectothiorhodospiraceae	Bacteria <prokaryotes>	7884	8235	9849	13332	14629
Edwardsiidae	Eukaryota	153	145	160	163	152
Eggerthellaceae	Bacteria <prokaryotes>	373	652	800	556	810
Eimeriidae	Eukaryota	5	8	27	16	15
Elateridae	Eukaryota	0	0	0	0	0
Elephantidae	Eukaryota	7	7	7	11	5
Elioraea	Bacteria <prokaryotes>	141	84	45	160	280
Elliptochloris	Eukaryota	0	0	0	0	1
Elusimicrobiaceae	Bacteria <prokaryotes>	201	289	331	360	396
Embiotocidae	Eukaryota	0	0	0	0	0
Embryophyta	Eukaryota	111	99	110	256	293
Emydidae	Eukaryota	1	2	1	51	3
Encyrtidae	Eukaryota	2	64	8	5	3
Endomicrobiaceae	Bacteria <prokaryotes>	168	83	92	64	90
Enhydrobacter	Bacteria <prokaryotes>	440	455	613	500	950
Entamoebidae	Eukaryota	97	74	31	50	51
Enterobacteriaceae	Bacteria <prokaryotes>	45665	36650	39548	43033	55224
Enterococcaceae	Bacteria <prokaryotes>	3335	3280	4391	4555	4204
Enterocytozoonidae	Eukaryota	38	28	16	5	15
Entomoplasmataceae	Bacteria <prokaryotes>	81	47	63	52	173
Ephedraceae	Eukaryota	7	5	10	5	5
Epulopiscium	Bacteria <prokaryotes>	7	5	7	46	33
Equidae	Eukaryota	2	4	5	1	1
Equisetaceae	Eukaryota	0	0	0	0	0
Eremoneura	Eukaryota	0	0	0	0	0
Ergasilidae	Eukaryota	0	0	0	0	0
Erinaceidae	Eukaryota	5	0	8	0	0
Erwinia phage vB_EamM_Caitlin	Viruses	0	0	1	5	5
Erwiniaceae	Bacteria <prokaryotes>	2409	2272	2254	2416	2726
Erysipelotrichaceae	Bacteria <prokaryotes>	2692	2273	2936	2505	3027
Erythrobacteraceae	Bacteria <prokaryotes>	14484	17095	6861	16370	12255
Erythrotrichiaceae	Eukaryota	0	1	0	0	0
Esocidae	Eukaryota	7	4	2	5	10
Estrildidae	Eukaryota	6	4	0	0	0
Ettlia	Eukaryota	0	0	0	0	0
Eubacteriaceae	Bacteria <prokaryotes>	3022	2645	2956	4576	4624
Euglenaceae	Eukaryota	1	0	0	0	0
Eukaryota sp. BB2	Eukaryota	0	0	0	0	0
Eumetazoa	Eukaryota	77	28	67	37	64
Eunotiaceae	Eukaryota	1	0	1	0	0
Euphorbiaceae	Eukaryota	118	91	153	111	184
Eupodiscaceae	Eukaryota	0	1	0	0	0
Eurypygidae	Eukaryota	0	0	0	0	0
Ezakiella	Bacteria <prokaryotes>	6	8	8	8	35
FCB group	Bacteria <prokaryotes>	79	40	52	41	92
Fabaceae	Eukaryota	202	173	128	370	335
Falconidae	Eukaryota	1	0	0	0	1
Fangia	Bacteria <prokaryotes>	1305	1497	1528	329	352
Felidae	Eukaryota	1	0	0	2	0
Fenollaria	Bacteria <prokaryotes>	29	117	28	17	19
Ferrimonadaceae	Bacteria <prokaryotes>	507	693	530	1186	784
Ferroplasmaceae	Archaea	174	151	174	54	84
Ferrovaceae	Bacteria <prokaryotes>	118	204	192	629	581
Fervidobacteriaceae	Bacteria <prokaryotes>	812	311	631	354	916
Fibrobacteraceae	Bacteria <prokaryotes>	2929	2607	3115	3541	2149
Fibroporia	Eukaryota	11	10	10	12	5
Fimbriimonadaceae	Bacteria <prokaryotes>	252	207	554	356	423
Flammeovirgaceae	Bacteria <prokaryotes>	13583	10252	14069	8295	11596
Flavobacteria bacterium BBFL7	Bacteria <prokaryotes>	516	107	39	53	15
Flavobacteria bacterium MS024-2A	Bacteria <prokaryotes>	447	165	219	142	228
Flavobacteria bacterium MS024-3C	Bacteria <prokaryotes>	23	44	156	26	30
Flavobacteriaceae	Bacteria <prokaryotes>	102654	86952	95446	86079	105232
Flavobacterium phage Fpv20	Viruses	256	402	162	25	42
Flavobacterium phage Fpv3	Viruses	613	1789	1146	980	320
Flavonifractor	Bacteria <prokaryotes>	1074	633	919	902	1325
Fonticula	Eukaryota	14	13	18	17	24
Formicidae	Eukaryota	227	166	279	305	429
Fortieaceae	Bacteria <prokaryotes>	79	102	44	21	11
Fragilariaceae	Eukaryota	2	14	1	2	4
Francisellaceae	Bacteria <prokaryotes>	2002	1433	1193	1455	1375
Frankiaceae	Bacteria <prokaryotes>	1059	1009	1833	928	1954
Fringillidae	Eukaryota	0	0	0	0	0
Fucaceae	Eukaryota	0	0	0	0	0
Funariaceae	Eukaryota	230	202	289	219	283
Fundulidae	Eukaryota	10	9	4	2	5
Fusobacteriaceae	Bacteria <prokaryotes>	2944	2631	4041	1466	2299
Fusochloris	Eukaryota	0	0	0	0	0
Galagidae	Eukaryota	1	3	1	3	10
Galaxauraceae	Eukaryota	0	0	0	0	0
Gallaecimonas	Bacteria <prokaryotes>	148	165	113	77	300
Gallionellaceae	Bacteria <prokaryotes>	643	1047	891	564	698
Gammaridae	Eukaryota	0	0	0	0	0
Gasterosteidae	Eukaryota	6	2	7	5	4
Gastropod associated circular ssDNA virus	Viruses	0	0	0	0	0
Gavialidae	Eukaryota	0	0	0	0	0
Gaviidae	Eukaryota	0	0	0	0	0
Gekkonidae	Eukaryota	25	7	32	18	38
Gelidiaceae	Eukaryota	0	0	0	0	0
Geminella	Eukaryota	0	0	0	0	0
Geminicoccus	Bacteria <prokaryotes>	557	265	412	149	256
Geminigeraceae	Eukaryota	380	314	411	444	776
Gemmataceae	Bacteria <prokaryotes>	11048	11068	13051	10915	15346
Gemmatimonadaceae	Bacteria <prokaryotes>	96	300	654	707	624
Geobacillus virus E2	Viruses	49	52	13	77	116
Geobacteraceae	Bacteria <prokaryotes>	4455	3797	6677	3638	6178
Geodermatophilaceae	Bacteria <prokaryotes>	537	516	550	369	509
Geomicrobium	Bacteria <prokaryotes>	359	203	119	37	110
Geomitridae	Eukaryota	0	0	0	0	0
Geoplanidae	Eukaryota	0	0	0	0	0
Geotoga	Bacteria <prokaryotes>	258	153	266	142	392
Geraniaceae	Eukaryota	0	0	0	0	0
Gesneriaceae	Eukaryota	0	0	0	0	0
Gigartinaceae	Eukaryota	175	115	344	165	154
Gigasporaceae	Eukaryota	0	0	0	0	0
Ginkgoaceae	Eukaryota	0	0	0	0	0
Glaucocystaceae	Eukaryota	0	0	0	0	0
Gloeobacteraceae	Bacteria <prokaryotes>	624	381	540	261	411
Gloeochaetaceae	Eukaryota	0	0	0	0	0
Gloeomargaritaceae	Bacteria <prokaryotes>	48	33	96	18	77
Gloeophyllaceae	Eukaryota	53	20	64	15	52
Gloeotilopsis	Eukaryota	0	0	0	0	0
Gloiosiphoniaceae	Eukaryota	1	0	0	0	0
Glomeraceae	Eukaryota	0	0	0	0	0
Glomerellaceae	Eukaryota	42	17	23	1	17
Glossiphoniidae	Eukaryota	148	55	71	88	40
Glossoscolecidae	Eukaryota	0	0	0	0	0
Glycomycetaceae	Bacteria <prokaryotes>	440	194	311	319	604
Gobiidae	Eukaryota	8	4	2	1	3
Gomontiellaceae	Bacteria <prokaryotes>	249	80	142	98	183
Gomphonemataceae	Eukaryota	1	1	2	0	2
Gongylonematidae	Eukaryota	0	0	0	0	0
Gordoniaceae	Bacteria <prokaryotes>	364	439	638	883	920
Gorgoniidae	Eukaryota	0	0	0	0	0
Gottschalkia	Bacteria <prokaryotes>	234	244	660	249	603
Gracilariaceae	Eukaryota	2	2	4	0	0
Granulosicoccaceae	Bacteria <prokaryotes>	55	36	59	31	43
Gregarinidae	Eukaryota	24	43	30	8	28
Grimmiaceae	Eukaryota	0	0	0	0	0
Gruidae	Eukaryota	0	0	0	0	0
Gryllidae	Eukaryota	0	0	0	0	0
Gymnochlora	Eukaryota	0	0	0	0	0
Gymnodiniaceae	Eukaryota	0	0	0	0	0
Haemoproteidae	Eukaryota	0	0	0	0	0
Hafniaceae	Bacteria <prokaryotes>	764	723	641	626	706
Hahellaceae	Bacteria <prokaryotes>	19052	14022	16741	17175	22109
Halanaerobiaceae	Bacteria <prokaryotes>	2551	3327	5269	2282	2468
Halcampoididae	Eukaryota	0	0	0	0	0
Haliclystidae	Eukaryota	0	0	0	0	0
Halictidae	Eukaryota	0	0	0	1	1
Halieaceae	Bacteria <prokaryotes>	1725	961	1029	1565	1409
Haliscomenobacteraceae	Bacteria <prokaryotes>	565	1023	874	843	1527
Haloarculaceae	Archaea	1161	815	1521	639	915
Halobacteriaceae	Archaea	1248	680	741	811	1165
Halobacteriovoraceae	Bacteria <prokaryotes>	445	222	389	175	496
Halobacteroidaceae	Bacteria <prokaryotes>	6174	3362	7096	4701	6491
Halococcaceae	Archaea	120	83	200	296	378
Haloferacaceae	Archaea	1544	1241	1278	750	1883
Halomonadaceae	Bacteria <prokaryotes>	26883	15987	19070	21727	27337
Haloplasmataceae	Bacteria <prokaryotes>	11	1	5	43	33
Halorubraceae	Archaea	990	666	790	1081	1513
Halothiobacillaceae	Bacteria <prokaryotes>	24	51	41	91	89
Haloviruses	Viruses	393	422	423	635	340
Halymeniaceae	Eukaryota	0	0	0	0	0
Hapalosiphonaceae	Bacteria <prokaryotes>	632	618	998	507	524
Harpochytriaceae	Eukaryota	0	0	0	0	0
Harrimaniidae	Eukaryota	916	412	614	393	401
Hartmannellidae	Eukaryota	0	0	0	0	0
Helicobacteraceae	Bacteria <prokaryotes>	5248	4073	4497	2270	3273
Helicosporidium	Eukaryota	0	0	0	0	0
Heliobacteriaceae	Bacteria <prokaryotes>	266	227	500	400	880
Helioporidae	Eukaryota	0	0	0	0	0
Helotiaceae	Eukaryota	1	0	0	0	2
Hemiaulaceae	Eukaryota	0	0	0	0	2
Hemiselmidaceae	Eukaryota	1	0	0	1	0
Herpesviridae	Viruses	19	8	1	7	5
Herpetosiphonaceae	Bacteria <prokaryotes>	310	572	900	1182	1159
Herpotrichiellaceae	Eukaryota	84	188	157	62	134
Hesperiidae	Eukaryota	0	0	0	0	0
Heterobranchia	Eukaryota	3	2	4	0	0
Heteromyidae	Eukaryota	0	0	0	0	0
Hexamitidae	Eukaryota	19	21	25	13	6
Hildenbrandiaceae	Eukaryota	0	0	1	0	1
Hipposideridae	Eukaryota	1	0	0	0	0
Histionidae	Eukaryota	0	1	1	0	0
Holophagaceae	Bacteria <prokaryotes>	993	744	1364	652	1451
Holosporaceae	Bacteria <prokaryotes>	92	86	131	22	142
Hominidae	Eukaryota	0	1	0	7	6
Homolidae	Eukaryota	0	0	0	2	0
Hormathiidae	Eukaryota	0	0	0	0	0
Hyalellidae	Eukaryota	82	50	59	122	109
Hyaloraphidium	Eukaryota	0	0	0	0	0
Hydractiniidae	Eukaryota	0	0	0	0	0
Hydridae	Eukaryota	42	37	67	76	73
Hydrococcaceae	Bacteria <prokaryotes>	112	108	276	24	64
Hydrogenimonas	Bacteria <prokaryotes>	428	467	389	634	850
Hydrogenophilaceae	Bacteria <prokaryotes>	160	241	467	167	138
Hydrogenothermaceae	Bacteria <prokaryotes>	7044	4497	5484	5913	7987
Hydrometridae	Eukaryota	0	0	0	0	0
Hydrophilidae	Eukaryota	0	0	0	0	0
Hyellaceae	Bacteria <prokaryotes>	2176	1971	2238	662	802
Hylobatidae	Eukaryota	0	0	0	0	0
Hymenobacteraceae	Bacteria <prokaryotes>	11751	13461	16719	9632	11735
Hymenochaetaceae	Eukaryota	106	33	18	15	23
Hyphomicrobiaceae	Bacteria <prokaryotes>	18525	17632	20542	20855	19610
Hyphomonadaceae	Bacteria <prokaryotes>	7055	8537	8005	10154	9817
Hypocreaceae	Eukaryota	12	16	21	8	41
Hypogastruridae	Eukaryota	0	0	0	0	0
Hytrosaviridae	Viruses	0	0	0	0	0
Ibaliidae	Eukaryota	0	0	0	0	0
Ichthyophthirius	Eukaryota	74	41	24	23	38
Ictaluridae	Eukaryota	10	13	14	2	24
Idiomarinaceae	Bacteria <prokaryotes>	464	600	638	765	728
Idiomarinaceae phage 1N2-2	Viruses	355	207	243	413	608
Ignatzschineria	Bacteria <prokaryotes>	249	184	243	226	88
Ignavibacteriaceae	Bacteria <prokaryotes>	2136	1151	1429	777	1108
Immundisolibacteraceae	Bacteria <prokaryotes>	203	114	114	175	252
Indriidae	Eukaryota	0	0	1	0	12
Inoviridae	Viruses	0	0	0	0	0
Intestinimonas	Bacteria <prokaryotes>	290	165	483	118	189
Intrasporangiaceae	Bacteria <prokaryotes>	1320	1603	1955	2019	2877
Iridoviridae	Viruses	246	155	175	85	187
Isosphaeraceae	Bacteria <prokaryotes>	1935	2602	4820	2250	4877
Isotomidae	Eukaryota	53	31	65	29	55
Ixodidae	Eukaryota	43	12	28	1	27
Jakobidae	Eukaryota	1	0	2	0	0
Jenufa	Eukaryota	0	0	0	0	0
Jiangellaceae	Bacteria <prokaryotes>	149	26	145	240	686
Jonesiaceae	Bacteria <prokaryotes>	21	9	9	29	25
Juglandaceae	Eukaryota	12	2	8	12	56
Kallipyga	Bacteria <prokaryotes>	34	65	49	32	27
Kangiellaceae	Bacteria <prokaryotes>	316	183	214	203	306
Kaumoebavirus	Viruses	557	415	528	196	666
Kiloniellaceae	Bacteria <prokaryotes>	5200	3993	5662	3132	3862
Kineosporiaceae	Bacteria <prokaryotes>	327	160	124	177	728
Kinetoplastibacterium	Bacteria <prokaryotes>	54	24	39	17	74
Kiritimatiellaceae	Bacteria <prokaryotes>	745	329	648	223	688
Klebsormidiaceae	Eukaryota	0	0	0	0	0
Kofleriaceae	Bacteria <prokaryotes>	1839	709	1554	670	1385
Koliellaceae	Eukaryota	0	0	0	0	0
Kordiimonadaceae	Bacteria <prokaryotes>	640	617	557	1167	1191
Kosmotogaceae	Bacteria <prokaryotes>	542	441	696	528	1223
Ktedonobacteraceae	Bacteria <prokaryotes>	315	437	672	855	555
Labridae	Eukaryota	23	12	6	2	6
Lachnospiraceae	Bacteria <prokaryotes>	18730	17130	23469	15490	20489
Lactobacillaceae	Bacteria <prokaryotes>	4302	3686	5270	5273	5779
Lactobacillus prophage Lj771	Viruses	0	0	0	4	4
Lake Sarah-associated circular molecule 5	Viruses	0	0	0	0	0
Lake Sarah-associated circular virus-11	Viruses	0	0	0	0	0
Lake Sarah-associated circular virus-19	Viruses	0	0	0	0	0
Lake Sarah-associated circular virus-3	Viruses	0	0	0	0	0
Lake Sarah-associated circular virus-42	Viruses	0	0	0	0	0
Lamiaceae	Eukaryota	0	0	0	0	0
Laminariaceae	Eukaryota	0	0	0	0	0
Lasiosphaeriaceae	Eukaryota	0	0	0	1	5
Lavidaviridae	Viruses	394	112	138	91	30
Lawsonella	Bacteria <prokaryotes>	2	7	15	2	1
Legionellaceae	Bacteria <prokaryotes>	4468	2744	4624	3056	6291
Lentibulariaceae	Eukaryota	0	0	0	0	0
Lentimicrobiaceae	Bacteria <prokaryotes>	473	469	572	191	440
Lentisphaeraceae	Bacteria <prokaryotes>	454	300	448	239	511
Lepadidae	Eukaryota	0	0	0	0	0
Lepisosteidae	Eukaryota	6	1	3	2	0
Leporidae	Eukaryota	0	0	0	0	0
Leptocylindraceae	Eukaryota	0	0	0	0	1
Leptolyngbyaceae	Bacteria <prokaryotes>	6818	7191	8540	2942	4617
Leptopilina boulardi filamentous virus	Viruses	0	0	0	0	0
Leptosomidae	Eukaryota	26	4	2	0	2
Leptosphaeriaceae	Eukaryota	35	6	22	6	20
Leptospiraceae	Bacteria <prokaryotes>	24594	24193	17724	27791	43097
Leptotrichiaceae	Bacteria <prokaryotes>	1274	1578	2158	1350	1652
Leucocytozoidae	Eukaryota	0	0	0	0	0
Leuconostocaceae	Bacteria <prokaryotes>	757	591	559	451	737
Leucopsacidae	Eukaryota	0	0	0	0	0
Levyella	Bacteria <prokaryotes>	1	16	2	0	21
Lewinellaceae	Bacteria <prokaryotes>	803	729	644	761	1191
Liagoraceae	Eukaryota	0	0	0	14	0
Limnephilidae	Eukaryota	0	0	0	0	0
Limnochordaceae	Bacteria <prokaryotes>	62	54	96	71	45
Limulidae	Eukaryota	81	891	1150	174	213
Lingulidae	Eukaryota	677	191	295	259	196
Lipotidae	Eukaryota	18	19	15	13	22
Listeriaceae	Bacteria <prokaryotes>	688	629	793	668	1106
Lithodesmiaceae	Eukaryota	0	0	0	2	11
Littorinidae	Eukaryota	0	0	0	0	0
Liviidae	Eukaryota	11	6	32	9	24
Loktanella phage pCB2051-A	Viruses	94	60	21	22	18
Lotharella	Eukaryota	1	0	0	0	0
Lottiidae	Eukaryota	18	26	26	21	43
Macroscelididae	Eukaryota	19	9	4	7	3
Magnaporthaceae	Eukaryota	7	12	29	50	277
Magnetococcaceae	Bacteria <prokaryotes>	5793	7376	11571	10959	8336
Malacoherpesviridae	Viruses	0	0	0	0	0
Malasseziaceae	Eukaryota	1	12	12	1	6
Malawimonadidae	Eukaryota	0	0	0	0	0
Mallomonadaceae	Eukaryota	0	0	0	0	0
Malvaceae	Eukaryota	73	102	90	112	270
Mamiellaceae	Eukaryota	1409	1519	1524	1338	1397
Mandibulata	Eukaryota	0	0	0	0	0
Manidae	Eukaryota	1	0	1	0	6
Marasmiaceae	Eukaryota	5	2	3	5	14
Marattiaceae	Eukaryota	0	0	0	0	0
Marchantiaceae	Eukaryota	0	0	0	0	0
Marine Group I	Archaea	571	391	485	1084	9767
Marinifilaceae	Bacteria <prokaryotes>	56	91	67	100	102
Marinilabiliaceae	Bacteria <prokaryotes>	3948	3213	4249	2527	2667
Marinitoga	Bacteria <prokaryotes>	1289	892	1834	1436	2218
Marinomonas phage P12026	Viruses	277	175	122	347	454
Mariprofundaceae	Bacteria <prokaryotes>	416	307	613	495	833
Marseilleviridae	Viruses	192	1200	2950	844	1098
McMurdo Ice Shelf pond-associated circular DNA virus-8	Viruses	0	0	0	0	0
Megachilidae	Eukaryota	44	4	20	3	5
Megophryidae	Eukaryota	0	0	0	0	0
Melampsoraceae	Eukaryota	21	1	9	1	3
Melioribacteraceae	Bacteria <prokaryotes>	573	339	665	406	821
Merismopediaceae	Bacteria <prokaryotes>	371	416	741	274	154
Meropidae	Eukaryota	0	0	1	0	0
Meruliaceae	Eukaryota	0	0	0	0	0
Merulinidae	Eukaryota	344	293	477	381	671
Mesitornithidae	Eukaryota	0	0	0	0	2
Mesoaciditogaceae	Bacteria <prokaryotes>	137	56	139	95	180
Mesostigmataceae	Eukaryota	0	0	0	1	10
Mesotaeniaceae	Eukaryota	0	0	0	0	0
Methanobacteriaceae	Archaea	1648	1238	1515	1236	1893
Methanocaldococcaceae	Archaea	826	1070	1477	1451	727
Methanocellaceae	Archaea	471	327	502	195	315
Methanococcaceae	Archaea	1416	990	972	2129	1595
Methanocorpusculaceae	Archaea	11	31	28	28	85
Methanomassiliicoccaceae	Archaea	2475	1430	1178	677	689
Methanomicrobiaceae	Archaea	1146	827	1561	968	1971
Methanonatronarchaeum	Archaea	539	234	384	224	256
Methanopyraceae	Archaea	102	59	57	35	40
Methanoregulaceae	Archaea	376	217	378	234	664
Methanosaetaceae	Archaea	154	73	66	44	44
Methanosarcinaceae	Archaea	2346	1839	2410	2433	4102
Methanospirillaceae	Archaea	7	15	13	15	25
Methanothermaceae	Archaea	149	62	54	27	35
Methermicoccaceae	Archaea	40	16	8	52	41
Methylacidiphilaceae	Bacteria <prokaryotes>	144	117	173	124	331
Methylobacteriaceae	Bacteria <prokaryotes>	15477	12130	14514	14727	18713
Methylobrevis	Bacteria <prokaryotes>	52	28	9	111	133
Methyloceanibacter	Bacteria <prokaryotes>	1371	2003	2075	3573	3727
Methylococcaceae	Bacteria <prokaryotes>	6979	6169	8477	6788	8323
Methylocystaceae	Bacteria <prokaryotes>	5979	4679	3675	5398	6463
Methyloligella	Bacteria <prokaryotes>	104	179	282	116	150
Methylophilaceae	Bacteria <prokaryotes>	2513	2271	1811	2221	3980
Methylothermaceae	Bacteria <prokaryotes>	190	121	122	87	71
Metschnikowiaceae	Eukaryota	26	5	23	15	27
Micavibrio	Bacteria <prokaryotes>	20058	22182	15230	24537	23911
Microascaceae	Eukaryota	30	18	7	5	21
Microbacteriaceae	Bacteria <prokaryotes>	3349	3235	4173	3954	6194
Microbotryaceae	Eukaryota	0	0	0	0	0
Microbulbiferaceae	Bacteria <prokaryotes>	1047	942	1062	1264	1469
Micrococcaceae	Bacteria <prokaryotes>	2302	2356	4600	3224	4824
Microcoleaceae	Bacteria <prokaryotes>	6514	5482	5112	3289	4135
Microcystaceae	Bacteria <prokaryotes>	2706	1689	1059	463	743
Microhylidae	Eukaryota	0	0	0	0	0
Micromonas pusilla virus 12T	Viruses	1535	1479	2024	1373	1909
Micromonosporaceae	Bacteria <prokaryotes>	5660	4886	5445	5158	8736
Microscillaceae	Bacteria <prokaryotes>	725	569	899	561	971
Microsporaceae	Eukaryota	0	0	0	0	0
Microthrixaceae	Bacteria <prokaryotes>	418	292	472	208	454
Microviridae	Viruses	0	0	0	0	0
Mimiviridae	Viruses	7382	4839	6361	2623	6049
Miraciidae	Eukaryota	0	0	0	0	0
Mitosporidium	Eukaryota	6	7	2	2	28
Mixiaceae	Eukaryota	72	84	72	33	45
Mollivirus sibericum	Viruses	0	1	0	1	0
Mongoliimonas	Bacteria <prokaryotes>	70	24	37	18	19
Monodopsidaceae	Eukaryota	3	4	7	19	17
Monomastigaceae	Eukaryota	0	0	0	0	0
Moraceae	Eukaryota	80	55	53	12	38
Moraxellaceae	Bacteria <prokaryotes>	15963	13128	15118	14350	15160
Morganellaceae	Bacteria <prokaryotes>	6453	5576	6226	5037	4213
Moritellaceae	Bacteria <prokaryotes>	351	546	534	936	972
Mortierellaceae	Eukaryota	57	44	40	45	125
Muribaculaceae	Bacteria <prokaryotes>	39	152	152	77	35
Muridae	Eukaryota	36	19	165	4	15
Musaceae	Eukaryota	70	285	425	280	218
Muscicapidae	Eukaryota	0	0	1	2	0
Muscidae	Eukaryota	162	66	113	32	4
Musophagidae	Eukaryota	0	0	0	0	0
Mustelidae	Eukaryota	5	0	0	0	0
Mychonastaceae	Eukaryota	0	0	0	0	0
Mycobacteriaceae	Bacteria <prokaryotes>	8567	7221	9333	9229	12315
Mycoplasmataceae	Bacteria <prokaryotes>	821	817	2134	1031	1598
Mycosphaerellaceae	Eukaryota	16	7	7	3	12
Myoviridae	Viruses	1298251	1159988	1098045	349325	499082
Myrmeleontidae	Eukaryota	0	0	0	0	0
Myrtaceae	Eukaryota	8	27	62	30	164
Mytilidae	Eukaryota	0	0	0	0	0
Myxococcaceae	Bacteria <prokaryotes>	2977	2254	1821	1488	2084
Nakamurellaceae	Bacteria <prokaryotes>	251	113	163	219	297
Nannocystaceae	Bacteria <prokaryotes>	476	132	235	96	119
Natranaerobiaceae	Bacteria <prokaryotes>	97	61	70	33	197
Natrialbaceae	Archaea	1039	589	945	1114	1518
Nautiliaceae	Bacteria <prokaryotes>	335	173	338	172	441
Naviculaceae	Eukaryota	0	0	0	0	0
Ndongobacter	Bacteria <prokaryotes>	6	6	3	6	5
Nectriaceae	Eukaryota	21	81	39	109	144
Neiella	Bacteria <prokaryotes>	40	18	14	36	55
Neisseriaceae	Bacteria <prokaryotes>	10679	7213	5887	5341	6672
Nelumbonaceae	Eukaryota	14	5	3	14	12
Nematocida	Eukaryota	285	158	259	46	60
Nemouridae	Eukaryota	0	0	0	0	0
Neochloridaceae	Eukaryota	0	0	0	0	0
Neocystis	Eukaryota	0	0	0	0	0
Neodangemannia	Eukaryota	0	0	0	0	0
Neofamilia	Bacteria <prokaryotes>	125	142	44	19	12
Neotrigoniidae	Eukaryota	0	0	0	0	0
Nephroselmis	Eukaryota	0	0	1	0	0
Neritidae	Eukaryota	0	0	0	0	0
Niphatidae	Eukaryota	169	112	166	45	123
Nitidulidae	Eukaryota	23	8	8	3	12
Nitratifractor	Bacteria <prokaryotes>	521	716	1345	834	864
Nitratiruptor	Bacteria <prokaryotes>	170	153	159	169	169
Nitriliruptoraceae	Bacteria <prokaryotes>	490	37	444	37	565
Nitrosomonadaceae	Bacteria <prokaryotes>	8529	8454	8885	10472	9518
Nitrosopumilaceae	Archaea	766	550	734	1003	4623
Nitrososphaeraceae	Archaea	21	124	168	573	495
Nitrospinaceae	Bacteria <prokaryotes>	1338	717	820	699	1971
Nitrospiraceae	Bacteria <prokaryotes>	14036	8563	11263	14395	19688
Nitrospirae bacterium HCH-1	Bacteria <prokaryotes>	644	404	620	615	634
Nocardiaceae	Bacteria <prokaryotes>	3127	2968	4507	4114	4604
Nocardioidaceae	Bacteria <prokaryotes>	1537	990	1662	1642	2507
Nocardiopsaceae	Bacteria <prokaryotes>	1236	858	2029	1356	2305
Noctuidae	Eukaryota	22	7	10	4	2
Noelaerhabdaceae	Eukaryota	406	265	243	198	387
Nosematidae	Eukaryota	61	54	77	41	38
Nostocaceae	Bacteria <prokaryotes>	5916	4734	3020	2931	1937
Nothobranchiidae	Eukaryota	3	0	0	0	8
Notoacmeibacteraceae	Bacteria <prokaryotes>	832	443	788	397	551
Nototheniidae	Eukaryota	9	15	49	9	6
Nucleariidae	Eukaryota	0	0	0	0	0
Nudiviridae	Viruses	0	0	0	0	0
Numididae	Eukaryota	0	0	0	0	0
OM43 clade	Bacteria <prokaryotes>	650	388	474	445	1022
Oceaniidae	Eukaryota	0	0	0	0	0
Oceanospirillaceae	Bacteria <prokaryotes>	19499	18255	16318	20606	21029
Ochotonidae	Eukaryota	0	0	0	0	0
Octodontidae	Eukaryota	0	3	1	1	0
Octopodidae	Eukaryota	48	16	26	32	50
Odobenidae	Eukaryota	0	0	0	0	9
Odoribacteraceae	Bacteria <prokaryotes>	418	392	420	910	1106
Oedocladium	Eukaryota	1	1	0	0	2
Oedogonium	Eukaryota	5	0	0	0	0
Oleiphilaceae	Bacteria <prokaryotes>	666	360	390	612	808
Olindiasidae	Eukaryota	0	0	0	0	0
Olindiidae	Eukaryota	0	0	0	0	0
Oltmannsiellopsis	Eukaryota	0	0	0	0	0
Onchocercidae	Eukaryota	10	30	22	19	30
Onygenaceae	Eukaryota	1	0	1	3	7
Ophiocordycipitaceae	Eukaryota	0	0	1	2	7
Ophiostomataceae	Eukaryota	1	5	13	3	4
Opisthocomidae	Eukaryota	0	0	0	0	0
Opisthorchiidae	Eukaryota	22	6	12	9	66
Opitutaceae	Bacteria <prokaryotes>	8070	5667	6511	5432	10033
Orbaceae	Bacteria <prokaryotes>	1283	1419	1657	2517	2127
Orbiliaceae	Eukaryota	1	1	2	3	3
Orchidaceae	Eukaryota	23	38	37	42	161
Ordosporidae	Eukaryota	27	71	30	14	19
Ornithorhynchidae	Eukaryota	1	0	0	0	1
Orthotrichaceae	Eukaryota	0	0	0	0	0
Orussidae	Eukaryota	4	11	20	11	10
Orycteropodidae	Eukaryota	3	1	0	0	0
Oscillatoriaceae	Bacteria <prokaryotes>	1963	1646	2639	1800	2652
Oscillochloridaceae	Bacteria <prokaryotes>	59	33	49	38	61
Oscillospiraceae	Bacteria <prokaryotes>	255	498	426	724	1173
Osteoglossidae	Eukaryota	11	11	17	1	25
Osteoglossocephalai	Eukaryota	2	0	0	2	29
Ostreidae	Eukaryota	65	51	46	67	67
Ostreobiaceae	Eukaryota	0	0	0	0	0
Ostreococcus lucimarinus virus OlV5	Viruses	28	32	32	23	18
Otididae	Eukaryota	0	0	0	0	1
Oxalobacteraceae	Bacteria <prokaryotes>	18744	18973	18333	21786	26427
Pacmanvirus A23	Viruses	68	185	220	204	579
Paenibacillaceae	Bacteria <prokaryotes>	29018	27725	30116	37765	45736
Palmariaceae	Eukaryota	0	1	0	1	0
Palmophyllum	Eukaryota	0	0	0	0	0
Palpitomonas	Eukaryota	0	0	0	0	0
Paludibacteraceae	Bacteria <prokaryotes>	211	426	399	414	396
Pandoravirus dulcis	Viruses	0	0	0	1	0
Pandoravirus inopinatum	Viruses	1	9	2	1	3
Pandoravirus salinus	Viruses	1	0	0	0	0
Papilionidae	Eukaryota	130	75	138	63	160
Parachlamydiaceae	Bacteria <prokaryotes>	4525	3447	3853	985	1406
Paracoccidioides	Eukaryota	3	2	3	0	1
Paralichthyidae	Eukaryota	15	12	9	19	32
Parameciidae	Eukaryota	61	31	37	21	16
Paramoebidae	Eukaryota	0	0	0	0	0
Parazoanthidae	Eukaryota	0	0	0	0	0
Paridae	Eukaryota	0	0	1	1	0
Partenskyella	Eukaryota	0	0	0	0	0
Parvularculaceae	Bacteria <prokaryotes>	387	258	282	542	732
Passerellidae	Eukaryota	0	0	1	5	12
Pasteurellaceae	Bacteria <prokaryotes>	7638	6284	6155	5035	5591
Patulibacteraceae	Bacteria <prokaryotes>	46	28	69	96	208
Paulinellidae	Eukaryota	68	49	25	14	30
Pavlovaceae	Eukaryota	0	0	2	0	0
Pectinidae	Eukaryota	91	61	60	76	101
Pectobacteriaceae	Bacteria <prokaryotes>	1201	1590	1336	1577	1729
Pedaliaceae	Eukaryota	7	5	9	4	78
Pediculidae	Eukaryota	42	51	95	22	15
Pedinomonadaceae	Eukaryota	0	0	0	4	3
Pelagibacteraceae	Bacteria <prokaryotes>	172871	80190	112395	92830	166710
Pelagiidae	Eukaryota	0	0	0	0	0
Pelecanidae	Eukaryota	0	0	0	0	0
Penaeidae	Eukaryota	0	0	0	0	0
Pentatomidae	Eukaryota	101	69	71	109	110
Peptococcaceae	Bacteria <prokaryotes>	5638	5456	8588	7170	9827
Peptoniphilaceae	Bacteria <prokaryotes>	3674	2936	3474	2289	3968
Peptostreptococcaceae	Bacteria <prokaryotes>	4641	3801	5723	4444	5335
Peridiniaceae	Eukaryota	0	0	0	0	0
Perkinsidae	Eukaryota	317	143	179	101	340
Peronosporaceae	Eukaryota	0	0	0	0	0
Persicobacteraceae	Bacteria <prokaryotes>	315	228	330	207	377
Petrosiidae	Eukaryota	0	0	0	0	0
Petrotoga	Bacteria <prokaryotes>	42	14	49	28	34
Phacotaceae	Eukaryota	0	0	0	0	0
Phaeocystaceae	Eukaryota	37	9	26	4	3
Phaeocystis globosa virus virophage	Viruses	23	17	6	6	8
Phaeodactylaceae	Eukaryota	136	120	114	78	134
Phaeosphaeriaceae	Eukaryota	97	229	132	154	289
Phaethontidae	Eukaryota	0	0	0	1	1
Phaffomycetaceae	Eukaryota	97	18	39	13	22
Phage Gifsy-2	Viruses	0	5	0	2	2
Phakopsoraceae	Eukaryota	0	0	0	0	0
Phalacrocoracidae	Eukaryota	0	0	0	0	0
Phanerochaetaceae	Eukaryota	12	1	4	3	21
Pharyngomonas	Eukaryota	0	0	0	0	0
Phascolarctidae	Eukaryota	4	2	3	1	1
Phasianidae	Eukaryota	10	18	53	13	2
Phialocephala <Helotiales>	Eukaryota	1	1	1	0	0
Phocaeicola	Bacteria <prokaryotes>	195	65	104	164	110
Phocidae	Eukaryota	0	0	0	0	2
Phormidium phage MIS-PhV1B	Viruses	1	8	14	0	0
Phrymaceae	Eukaryota	83	19	24	120	282
Phycisphaeraceae	Bacteria <prokaryotes>	137	99	92	90	209
Phycisphaerae bacterium L21-RPul-D3	Bacteria <prokaryotes>	155	89	124	103	119
Phycisphaerae bacterium SM-PulAB-D3	Bacteria <prokaryotes>	813	455	755	1797	2234
Phycisphaerae bacterium ST-PulAB-D4	Bacteria <prokaryotes>	17	26	15	43	136
Phycodnaviridae	Viruses	17110	13856	15719	9301	17047
Phycomycetaceae	Eukaryota	25	10	18	21	36
Phyllobacteriaceae	Bacteria <prokaryotes>	23622	24401	23978	29293	29690
Phyllophoraceae	Eukaryota	14	3	10	0	0
Physeteridae	Eukaryota	0	0	0	2	1
Phytophthora	Eukaryota	452	366	387	278	512
Phytoseiidae	Eukaryota	9	10	9	9	22
Pichiaceae	Eukaryota	4	4	7	2	12
Picidae	Eukaryota	30	17	20	8	4
Picocystis	Eukaryota	0	0	0	0	0
Picrophilaceae	Archaea	93	79	78	72	58
Pieridae	Eukaryota	0	0	0	0	11
Pinaceae	Eukaryota	1	0	0	0	1
Pipidae	Eukaryota	89	83	125	18	32
Pipridae	Eukaryota	0	0	0	1	0
Piscirickettsiaceae	Bacteria <prokaryotes>	2844	3143	5268	4173	4347
Pithoviridae	Viruses	92	58	100	60	72
Placobranchidae	Eukaryota	0	0	0	0	0
Plakinidae	Eukaryota	0	0	0	0	0
Planctomycetaceae	Bacteria <prokaryotes>	14856	12380	21124	12472	21255
Planctonema	Eukaryota	20	0	16	4	2
Planococcaceae	Bacteria <prokaryotes>	1771	1091	1670	1441	2240
Planorbidae	Eukaryota	106	122	112	45	151
Plasmodiidae	Eukaryota	99	50	68	59	205
Plasmodiophoridae	Eukaryota	0	0	0	0	0
Plectosphaerellaceae	Eukaryota	1	0	0	0	0
Pleistophoridae	Eukaryota	6	3	2	5	5
Pleosporaceae	Eukaryota	23	17	20	21	67
Plesiomonas	Bacteria <prokaryotes>	64	124	69	239	89
Pleurobrachiidae	Eukaryota	0	0	0	0	0
Pleurotaceae	Eukaryota	0	0	0	0	0
Pleuroziaceae	Eukaryota	0	0	0	0	0
Plexauridae	Eukaryota	1	0	0	0	0
Plocamiaceae	Eukaryota	15	12	24	3	11
Plutellidae	Eukaryota	54	59	73	54	48
Pneumocystidaceae	Eukaryota	24	6	11	21	19
Poaceae	Eukaryota	323	194	189	440	289
Podocarpaceae	Eukaryota	0	0	0	0	0
Podoviridae	Viruses	1023194	940400	992342	525882	417585
Poeciliidae	Eukaryota	8	2	3	4	5
Polyangiaceae	Bacteria <prokaryotes>	38137	65209	21434	58534	30643
Polydnaviridae	Viruses	0	0	0	0	0
Polymorphum	Bacteria <prokaryotes>	570	396	318	703	157
Polyporaceae	Eukaryota	72	29	30	25	46
Polysphondylium	Eukaryota	313	60	152	105	291
Pomacentridae	Eukaryota	13	6	3	6	21
Porphyridiaceae	Eukaryota	4	0	5	0	8
Porphyromonadaceae	Bacteria <prokaryotes>	2649	2321	2852	2437	3269
Porticoccaceae	Bacteria <prokaryotes>	251	179	184	121	87
Pottiaceae	Eukaryota	0	0	0	0	0
Potyviridae	Viruses	0	0	0	0	0
Poxviridae	Viruses	47	19	17	10	22
Prasinoderma	Eukaryota	0	0	0	0	0
Prevotellaceae	Bacteria <prokaryotes>	3602	4223	5342	5067	8916
Priapulidae	Eukaryota	5	19	16	2	6
Procellariidae	Eukaryota	0	0	1	0	4
Prochloraceae	Bacteria <prokaryotes>	26690	27159	31689	9238	12159
Prochlorococcus phage P-GSP1	Viruses	60127	32302	27196	1812	7661
Prochlorococcus phage P-SSP3	Viruses	30001	13347	11312	641	1522
Prolixibacteraceae	Bacteria <prokaryotes>	1527	1469	1663	1528	1663
Promicromonosporaceae	Bacteria <prokaryotes>	284	406	485	597	357
Propionibacteriaceae	Bacteria <prokaryotes>	815	485	1357	573	946
Prosorrhyncha	Eukaryota	0	0	0	0	0
Proteiniborus	Bacteria <prokaryotes>	166	199	173	257	218
Proteinivoraceae	Bacteria <prokaryotes>	200	116	144	224	144
Proteromonadidae	Eukaryota	0	0	0	0	0
Psathyrellaceae	Eukaryota	40	17	19	4	21
Pseudanabaenaceae	Bacteria <prokaryotes>	3289	2479	2464	1745	2044
Pseudendoclonium	Eukaryota	0	0	0	0	0
Pseudeurotiaceae	Eukaryota	39	7	11	5	18
Pseudoalteromonadaceae	Bacteria <prokaryotes>	14479	19310	13297	22870	22785
Pseudoalteromonas phage BS5	Viruses	16	6	8	43	124
Pseudoalteromonas phage PH1	Viruses	31	79	147	1	11
Pseudochloris	Eukaryota	0	0	0	0	0
Pseudoflavonifractor	Bacteria <prokaryotes>	286	406	1341	243	283
Pseudohongiella	Bacteria <prokaryotes>	589	799	808	1053	1016
Pseudomonadaceae	Bacteria <prokaryotes>	40644	39098	42718	53668	57615
Pseudomonas phage O4	Viruses	959	519	427	694	438
Pseudomonas phage PA11	Viruses	222	117	114	455	335
Pseudomonas phage phiPto-bp6g	Viruses	4	2	2	0	13
Pseudomonas phage vB_PaeM_MAG1	Viruses	1	0	1	0	0
Pseudomonas phage vB_PaeP_Tr60_Ab31	Viruses	0	8	13	31	37
Pseudomuriellaceae	Eukaryota	0	0	0	0	0
Pseudoneochloris	Eukaryota	0	0	0	0	0
Pseudonocardiaceae	Bacteria <prokaryotes>	5812	3959	6029	5074	7751
Pseudorhodoplanes	Bacteria <prokaryotes>	440	232	274	126	180
Psittacidae	Eukaryota	0	0	0	0	0
Psittaculidae	Eukaryota	0	0	0	0	1
Psychromonadaceae	Bacteria <prokaryotes>	1316	939	1436	2136	2190
Pterocladiaceae	Eukaryota	0	0	0	0	0
Pteroclidae	Eukaryota	0	0	0	0	0
Pteromalidae	Eukaryota	2	2	3	6	33
Pteropodidae	Eukaryota	6	1	2	10	5
Pucciniaceae	Eukaryota	30	36	64	7	11
Punctulariaceae	Eukaryota	7	8	3	1	4
Puniceicoccaceae	Bacteria <prokaryotes>	167	178	215	176	253
Pycnococcaceae	Eukaryota	0	0	0	0	0
Pyralidae	Eukaryota	111	34	88	16	13
Pyramimonas	Eukaryota	0	1	0	0	0
Pyrenomonadaceae	Eukaryota	0	0	0	0	0
Pyrinomonas	Bacteria <prokaryotes>	216	167	245	165	561
Pyrodictiaceae	Archaea	75	98	141	108	61
Pyroglyphidae	Eukaryota	0	0	0	0	0
Pythiaceae	Eukaryota	0	0	0	0	0
Pythonidae	Eukaryota	2	2	1	2	1
Ralstonia phage RS138	Viruses	8	26	7	5	2
Reduviidae	Eukaryota	0	0	0	0	0
Renillidae	Eukaryota	0	0	0	0	0
Reoviridae	Viruses	1	0	0	0	1
Retroviridae	Viruses	2	0	0	0	1
Reyranella	Bacteria <prokaryotes>	441	309	326	332	374
Rhabditidae	Eukaryota	87	28	36	24	82
Rhamnaceae	Eukaryota	42	95	284	11	30
Rhincodontidae	Eukaryota	66	31	61	7	50
Rhinocerotidae	Eukaryota	0	2	0	0	0
Rhinolophidae	Eukaryota	0	1	0	0	5
Rhizobiaceae	Bacteria <prokaryotes>	81474	77834	71407	76675	88779
Rhizobium phage RHEph10	Viruses	2819	1609	998	560	215
Rhizosoleniaceae	Eukaryota	4	0	3	1	0
Rhizostomatidae	Eukaryota	0	0	0	0	0
Rhodanobacteraceae	Bacteria <prokaryotes>	8898	6018	7195	7779	6740
Rhodobacter phage RcapNL	Viruses	0	6	2	52	3
Rhodobacteraceae	Bacteria <prokaryotes>	108129	117626	103635	147415	166376
Rhodobiaceae	Bacteria <prokaryotes>	2644	2600	3100	3494	4295
Rhodochaetaceae	Eukaryota	0	0	0	0	0
Rhodocyclaceae	Bacteria <prokaryotes>	443	402	274	503	595
Rhodomelaceae	Eukaryota	9	9	12	36	52
Rhodospirillaceae	Bacteria <prokaryotes>	70790	64499	73632	68001	67072
Rhodothermaceae	Bacteria <prokaryotes>	1801	2545	5298	3917	4512
Rhodymeniaceae	Eukaryota	0	0	2	0	0
Rickettsiaceae	Bacteria <prokaryotes>	3484	3327	4265	3402	3774
Rikenellaceae	Bacteria <prokaryotes>	5884	6595	4791	6425	5917
Rivulariaceae	Bacteria <prokaryotes>	1432	898	1048	553	987
Rivulidae	Eukaryota	35	6	10	9	11
Rosaceae	Eukaryota	327	256	351	359	434
Roseiflexaceae	Bacteria <prokaryotes>	63	72	106	232	160
Rossellidae	Eukaryota	0	0	0	0	0
Ruaniaceae	Bacteria <prokaryotes>	6	2	6	37	36
Rubricoccaceae	Bacteria <prokaryotes>	395	343	477	507	644
Rubritaleaceae	Bacteria <prokaryotes>	241	117	160	72	155
Rubrobacteraceae	Bacteria <prokaryotes>	420	597	692	920	1053
Ruminococcaceae	Bacteria <prokaryotes>	10721	10449	12902	13272	13683
Rutaceae	Eukaryota	149	101	180	178	231
SAR116 cluster	Bacteria <prokaryotes>	11745	10085	9279	9136	8265
SAR92 clade	Bacteria <prokaryotes>	142	86	64	122	308
Saccharomycetaceae	Eukaryota	60	43	72	20	50
Saccharospirillaceae	Bacteria <prokaryotes>	166	67	107	156	149
Saccotheciaceae	Eukaryota	53	26	11	7	11
Sagittidae	Eukaryota	0	0	0	0	0
Sagittiferidae	Eukaryota	0	0	0	0	0
Saitoella	Eukaryota	1	2	0	6	1
Salicaceae	Eukaryota	107	234	275	514	274
Salicola phage CGphi29	Viruses	134	107	94	438	316
Salinisphaeraceae	Bacteria <prokaryotes>	76180	91198	68805	117471	118959
Salinivirgaceae	Bacteria <prokaryotes>	377	186	223	139	210
Salisaeta icosahedral phage 1	Viruses	91	67	152	117	267
Salmonella phage 64795_sal3	Viruses	2	1	0	36	88
Salmonella phage Fels-1	Viruses	18	25	7	0	0
Salmonidae	Eukaryota	7	2	9	2	11
Salpingoecidae	Eukaryota	1776	1110	1212	1828	3359
Sandaracinaceae	Bacteria <prokaryotes>	684	231	436	270	581
Sanguibacteraceae	Bacteria <prokaryotes>	35	23	5	6	11
Saprolegniaceae	Eukaryota	1407	1032	1494	503	1082
Saprospiraceae	Bacteria <prokaryotes>	5090	3193	5301	4141	6072
Sarcocystidae	Eukaryota	1	3	4	8	66
Sargassaceae	Eukaryota	0	0	0	0	0
Schistosomatidae	Eukaryota	47	17	11	17	34
Schizomeridaceae	Eukaryota	0	0	0	0	0
Schizophyllaceae	Eukaryota	32	12	12	9	19
Schizosaccharomycetaceae	Eukaryota	85	56	32	24	80
Schizymeniaceae	Eukaryota	0	0	0	0	0
Schleiferiaceae	Bacteria <prokaryotes>	70	54	61	44	81
Sciadopityaceae	Eukaryota	0	0	0	0	0
Sciaenidae	Eukaryota	9	6	21	2	7
Scinaiaceae	Eukaryota	0	0	0	0	0
Sciuridae	Eukaryota	0	0	0	0	5
Sclerotiniaceae	Eukaryota	1	0	1	1	2
Scolopacidae	Eukaryota	3	0	0	0	3
Scytonemataceae	Bacteria <prokaryotes>	321	270	330	419	975
Scytosiphonaceae	Eukaryota	0	0	0	0	0
Sebdeniaceae	Eukaryota	2	2	1	0	0
Seculamonas	Eukaryota	0	0	0	1	3
Sedimentibacter	Bacteria <prokaryotes>	67	19	11	5	20
Sedimenticola	Bacteria <prokaryotes>	74	34	55	73	189
Segniliparaceae	Bacteria <prokaryotes>	35	34	55	116	112
Selaginellaceae	Eukaryota	18	29	21	35	233
Selenastraceae	Eukaryota	59	34	24	30	33
Selenomonadaceae	Bacteria <prokaryotes>	3206	2598	3617	4711	5073
Serpulaceae	Eukaryota	96	24	40	14	40
Serrasalmidae	Eukaryota	51	16	29	14	9
Shewanellaceae	Bacteria <prokaryotes>	6040	5894	6375	6813	6094
Siderastreidae	Eukaryota	0	0	0	0	0
Silphidae	Eukaryota	33	6	26	9	31
Simkaniaceae	Bacteria <prokaryotes>	189	135	231	221	431
Sinentomidae	Eukaryota	0	0	0	0	0
Sinobacteraceae	Bacteria <prokaryotes>	531	702	668	348	473
Siphonariidae	Eukaryota	0	0	0	0	0
Siphoviridae	Viruses	173677	168443	149500	135280	157533
Skeletonemataceae	Eukaryota	0	1	1	0	1
Sneathiellaceae	Bacteria <prokaryotes>	1644	2169	3476	2403	2549
Solanaceae	Eukaryota	117	131	232	354	560
Solibacteraceae	Bacteria <prokaryotes>	674	458	481	468	508
Solieriaceae	Eukaryota	0	0	0	0	0
Solirubrobacteraceae	Bacteria <prokaryotes>	451	422	573	723	875
Solirubrum	Bacteria <prokaryotes>	59	69	88	100	181
Sordariaceae	Eukaryota	3	7	7	3	26
Soricidae	Eukaryota	0	2	9	0	1
Spalacidae	Eukaryota	0	0	0	0	0
Sphaerobacteraceae	Bacteria <prokaryotes>	954	1657	3934	5135	4096
Sphaeroforma	Eukaryota	881	902	1337	389	693
Sphaerolipoviridae	Viruses	3	1	1	5	0
Sphaeropleaceae	Eukaryota	0	0	0	0	0
Spheniscidae	Eukaryota	0	0	0	0	0
Sphingobacteriaceae	Bacteria <prokaryotes>	12060	9935	11673	10919	15233
Sphingomonadaceae	Bacteria <prokaryotes>	40477	38195	41346	49838	57379
Spirochaetaceae	Bacteria <prokaryotes>	6243	4744	6641	5873	7580
Spiroplasmataceae	Bacteria <prokaryotes>	247	414	538	397	569
Spirulinaceae	Bacteria <prokaryotes>	103	84	190	100	64
Spizellomycetaceae	Eukaryota	243	271	457	49	143
Spongiibacteraceae	Bacteria <prokaryotes>	891	707	1303	497	660
Sporanaerobacter	Bacteria <prokaryotes>	421	198	213	157	224
Sporichthyaceae	Bacteria <prokaryotes>	9	1	4	2	27
Sporidiobolaceae	Eukaryota	8	13	9	60	61
Sporocadaceae	Eukaryota	6	22	11	3	4
Sporolactobacillaceae	Bacteria <prokaryotes>	357	430	1017	361	785
Sporolithaceae	Eukaryota	0	0	0	5	3
Sporomusaceae	Bacteria <prokaryotes>	3268	2587	3787	3316	5338
Staphylococcaceae	Bacteria <prokaryotes>	4932	4849	5857	5277	6515
Staphylococcus phage tp310-1	Viruses	0	0	0	7	7
Stenopodidae	Eukaryota	0	0	0	0	0
Stenostomidae	Eukaryota	0	0	0	0	0
Stereaceae	Eukaryota	21	3	5	5	16
Sterolibacteriaceae	Bacteria <prokaryotes>	509	409	689	464	491
Stichococcus	Eukaryota	0	0	0	0	0
Stigeoclonium	Eukaryota	0	0	0	0	0
Streptococcaceae	Bacteria <prokaryotes>	3790	4285	7774	4330	5153
Streptococcus phage 370.1	Viruses	12	12	29	0	8
Streptococcus phage phiARI0004	Viruses	6	2	1	8	33
Streptococcus phage phiARI0462	Viruses	0	0	0	1	7
Streptomycetaceae	Bacteria <prokaryotes>	17303	14738	22064	20581	29623
Streptosporangiaceae	Bacteria <prokaryotes>	2493	1745	2423	3031	4509
Strongylocentrotidae	Eukaryota	110	91	135	65	134
Struthionidae	Eukaryota	2	1	0	4	6
Sturnidae	Eukaryota	0	0	0	0	0
Styelidae	Eukaryota	0	0	0	0	0
Stylonemataceae	Eukaryota	0	0	1	0	0
Styracaceae	Eukaryota	0	0	3	0	1
Succinivibrionaceae	Bacteria <prokaryotes>	1070	1139	1656	756	688
Suidae	Eukaryota	0	0	1	0	1
Sulfitobacter phage NYA-2014a	Viruses	40	44	11	61	183
Sulfitobacter phage pCB2047-A	Viruses	15	4	9	23	64
Sulfitobacter phage pCB2047-C	Viruses	30	2	17	0	14
Sulfolobaceae	Archaea	1120	963	1329	565	793
Sulfolobus monocaudavirus SMV2	Viruses	0	0	0	0	0
Sulfurovum	Bacteria <prokaryotes>	327	272	568	212	300
Sutterellaceae	Bacteria <prokaryotes>	2019	2462	2223	2914	2912
Symbiobacteriaceae	Bacteria <prokaryotes>	84	145	204	414	629
Symphyonemataceae	Bacteria <prokaryotes>	83	64	50	3	19
Sympoventuriaceae	Eukaryota	7	6	5	1	30
Synbranchidae	Eukaryota	0	0	0	0	1
Synechococcaceae	Bacteria <prokaryotes>	19389	18934	20622	5207	6814
Synechococcus phage S-CAM22	Viruses	5803	5408	4591	1732	2631
Synechococcus phage S-CAM3	Viruses	5656	3971	3756	1814	2898
Synechococcus phage S-CAM4	Viruses	552	373	378	94	204
Synechococcus phage S-CAM7	Viruses	6693	6313	6143	3223	3479
Synechococcus phage S-CAM9	Viruses	64857	44774	32498	6558	18862
Synechococcus phage S-CBP2	Viruses	763	802	689	171	84
Synechococcus phage S-CBP3	Viruses	67610	58950	71511	3153	4396
Synergistaceae	Bacteria <prokaryotes>	5301	3577	5064	2933	3250
Syngnathidae	Eukaryota	5	1	3	2	1
Syntrophaceae	Bacteria <prokaryotes>	1481	907	1352	1836	1915
Syntrophobacteraceae	Bacteria <prokaryotes>	451	448	525	646	1017
Syntrophomonadaceae	Bacteria <prokaryotes>	1242	1130	865	1749	2583
Syntrophorhabdaceae	Bacteria <prokaryotes>	474	663	1368	698	941
Talpidae	Eukaryota	11	3	4	2	1
Tannerellaceae	Bacteria <prokaryotes>	1377	1247	2207	1848	1947
Tarsiidae	Eukaryota	1	0	0	0	5
Taxaceae	Eukaryota	0	0	0	0	0
Tenebrionidae	Eukaryota	17	7	16	17	73
Tenrecidae	Eukaryota	29	6	26	9	17
Tenthredinidae	Eukaryota	1	1	4	3	1
Tephritidae	Eukaryota	80	90	44	198	67
Tepidimicrobium	Bacteria <prokaryotes>	1282	2065	1694	2265	1856
Terasakiispira	Bacteria <prokaryotes>	1	45	41	114	107
Teratosphaeriaceae	Eukaryota	3	1	7	0	18
Termopsidae	Eukaryota	242	131	82	37	55
Terrimicrobium	Bacteria <prokaryotes>	858	1433	1304	883	944
Tetragonuridae	Eukaryota	0	0	0	0	0
Tetrahymenidae	Eukaryota	583	512	429	390	513
Tetranychidae	Eukaryota	34	27	24	25	81
Tetraodontidae	Eukaryota	19	15	10	7	6
Tetraselmis viridis virus S1	Viruses	0	2	0	0	0
Tetraselmis viridis virus S20	Viruses	2	2	1	9	31
Thalassiosiraceae	Eukaryota	122	68	117	41	105
Theileriidae	Eukaryota	85	75	67	13	53
Theria <Mammalia>	Eukaryota	0	0	0	1	2
Theridiidae	Eukaryota	37	26	19	22	41
Thermaceae	Bacteria <prokaryotes>	1575	1434	1938	2731	2860
Thermithiobacillaceae	Bacteria <prokaryotes>	313	367	226	467	452
Thermoactinomycetaceae	Bacteria <prokaryotes>	4311	6550	10279	7697	9926
Thermoanaerobacteraceae	Bacteria <prokaryotes>	18141	23131	20331	31319	38545
Thermoanaerobacterales Family III. Incertae Sedis	Bacteria <prokaryotes>	2004	1482	3353	2629	3218
Thermoanaerobacterales Family IV. Incertae Sedis	Bacteria <prokaryotes>	310	400	399	658	1082
Thermoanaerobaculum	Bacteria <prokaryotes>	35	129	276	95	113
Thermobaculum	Bacteria <prokaryotes>	160	47	198	73	286
Thermobispora	Bacteria <prokaryotes>	12	1	9	26	38
Thermococcaceae	Archaea	2382	2958	2585	3770	5263
Thermodesulfobacteriaceae	Bacteria <prokaryotes>	3635	3031	3822	3777	4537
Thermodesulfobiaceae	Bacteria <prokaryotes>	296	185	259	135	217
Thermofilaceae	Archaea	260	99	148	86	174
Thermoflexaceae	Bacteria <prokaryotes>	275	252	222	201	234
Thermoflexibacter	Bacteria <prokaryotes>	189	187	194	159	276
Thermogemmatisporaceae	Bacteria <prokaryotes>	108	193	282	665	475
Thermoleophilaceae	Bacteria <prokaryotes>	91	13	157	51	91
Thermomicrobiaceae	Bacteria <prokaryotes>	135	37	72	30	104
Thermomonosporaceae	Bacteria <prokaryotes>	566	399	646	1054	1581
Thermonemataceae	Bacteria <prokaryotes>	423	333	466	111	272
Thermopetrobacter	Bacteria <prokaryotes>	75	55	67	101	138
Thermoplasmataceae	Archaea	400	1748	1949	456	337
Thermoproteaceae	Archaea	466	841	760	419	538
Thermorudis	Bacteria <prokaryotes>	84	169	171	472	509
Thermosulfidibacter	Bacteria <prokaryotes>	201	160	235	153	233
Thermotogaceae	Bacteria <prokaryotes>	1169	482	753	510	733
Thiobacillaceae	Bacteria <prokaryotes>	225	158	131	151	203
Thioflexothrix	Bacteria <prokaryotes>	35	24	35	72	124
Thiohalorhabdus	Bacteria <prokaryotes>	53	38	54	23	21
Thiolapillus	Bacteria <prokaryotes>	126	182	74	172	253
Thiotrichaceae	Bacteria <prokaryotes>	2213	1502	2489	998	2310
Thoreaceae	Eukaryota	0	0	1	0	1
Thorectidae	Eukaryota	0	0	0	0	0
Thorselliaceae	Bacteria <prokaryotes>	46	25	17	20	36
Thraupidae	Eukaryota	0	0	0	0	0
Threskiornithidae	Eukaryota	0	0	0	0	0
Tilletiariaceae	Eukaryota	0	1	1	0	1
Timonella	Bacteria <prokaryotes>	38	12	43	44	134
Tinamidae	Eukaryota	0	0	0	0	3
Tissierellaceae	Bacteria <prokaryotes>	852	926	2178	628	1047
Togniniaceae	Eukaryota	0	0	1	0	0
Tolypothrichaceae	Bacteria <prokaryotes>	519	416	577	261	441
Tomitella	Bacteria <prokaryotes>	41	139	103	52	61
Toxariaceae	Eukaryota	79	26	9	0	0
Trachydiscus	Eukaryota	0	0	0	0	4
Trebouxiophyceae sp. MX-AZ01	Eukaryota	0	0	0	0	0
Tremellaceae	Eukaryota	6	10	1	9	56
Treubiaceae	Eukaryota	0	0	0	0	0
Trichechidae	Eukaryota	5	0	0	0	0
Trichinellidae	Eukaryota	82	22	49	26	36
Trichocomaceae	Eukaryota	14	3	1	2	8
Trichogrammatidae	Eukaryota	10	15	2	23	21
Tricholomataceae	Eukaryota	7	16	9	1	5
Trichomonadidae	Eukaryota	82	109	48	51	43
Trichomonascaceae	Eukaryota	30	17	37	10	58
Trichoplax	Eukaryota	82	62	135	91	60
Trichosarcina	Eukaryota	0	0	0	0	0
Trichosporonaceae	Eukaryota	60	109	55	12	51
Trigonalidae	Eukaryota	0	0	0	0	0
Trionychidae	Eukaryota	36	46	34	2	12
Triparmaceae	Eukaryota	2	0	2	0	0
Tristromaviridae	Viruses	0	0	0	20	21
Trochilidae	Eukaryota	3	0	0	0	1
Trogonidae	Eukaryota	0	0	0	0	0
Trombiculidae	Eukaryota	0	0	0	0	0
Tropheryma	Bacteria <prokaryotes>	0	0	0	0	0
Trueperaceae	Bacteria <prokaryotes>	299	95	341	137	222
Trypanosomatidae	Eukaryota	189	181	296	157	284
Tsukamurellaceae	Bacteria <prokaryotes>	26	29	46	24	37
Tsukubamonadidae	Eukaryota	0	0	0	0	0
Tuberaceae	Eukaryota	2	3	0	0	1
Tupaiidae	Eukaryota	11	11	0	0	0
Tytonidae	Eukaryota	2	0	0	2	0
Udoteaceae	Eukaryota	0	0	0	0	0
Ulmaridae	Eukaryota	0	0	0	0	0
Ulvaceae	Eukaryota	1	0	0	6	7
Unikaryonidae	Eukaryota	200	128	226	103	297
Unionidae	Eukaryota	0	0	0	0	0
Upogebiidae	Eukaryota	0	0	0	0	0
Urechidae	Eukaryota	0	0	0	0	0
Ursidae	Eukaryota	6	3	1	0	1
Ustilaginaceae	Eukaryota	53	8	62	22	20
Vahlkampfiidae	Eukaryota	1921	1583	1761	535	1302
Vanhorniidae	Eukaryota	0	0	0	0	0
Vaucheriaceae	Eukaryota	0	1	0	0	0
Veillonellaceae	Bacteria <prokaryotes>	1960	2723	3703	4063	4370
Ventosimonadaceae	Bacteria <prokaryotes>	2	14	2	95	97
Vermetidae	Eukaryota	0	0	0	0	0
Verrucariaceae	Eukaryota	1	0	1	0	2
Verrucomicrobia subdivision 3	Bacteria <prokaryotes>	930	452	446	449	1031
Verrucomicrobiaceae	Bacteria <prokaryotes>	4931	3620	5274	3247	5035
Verrucomicrobiae bacterium DG1235	Bacteria <prokaryotes>	938	478	571	383	1268
Vertebrata <Metazoa>	Eukaryota	16	15	6	12	36
Vespertilionidae	Eukaryota	31	11	42	21	9
Vespidae	Eukaryota	17	7	14	5	6
Vibrio phage PWH3a-P1	Viruses	179	78	51	108	81
Vibrio phage VBM1	Viruses	41	19	15	157	101
Vibrio phage douglas 12A4	Viruses	7	29	67	13	69
Vibrio phage eugene 12A10	Viruses	13	8	15	24	7
Vibrio phage helene 12B3	Viruses	170	71	106	125	448
Vibrio phage henriette 12B8	Viruses	73	6	21	28	105
Vibrio phage qdvp001	Viruses	86	76	23	255	161
Vibrionaceae	Bacteria <prokaryotes>	103733	106962	75083	111374	113484
Viperidae	Eukaryota	6	2	0	17	14
Vitaceae	Eukaryota	54	7	13	16	39
Volvocaceae	Eukaryota	406	458	207	372	232
Vulgatibacteraceae	Bacteria <prokaryotes>	295	227	323	123	683
Waddliaceae	Bacteria <prokaryotes>	429	477	467	539	755
Wallemia	Eukaryota	47	19	19	19	67
Watanabea	Eukaryota	0	0	0	0	0
Welwitschiaceae	Eukaryota	0	0	0	0	0
Wenzhouxiangellaceae	Bacteria <prokaryotes>	100	171	210	230	164
Williamsiaceae	Bacteria <prokaryotes>	89	37	65	79	184
Williamwhitmaniaceae	Bacteria <prokaryotes>	599	758	354	151	390
Woeseiaceae	Bacteria <prokaryotes>	632	434	460	469	414
Wohlfahrtiimonas	Bacteria <prokaryotes>	849	623	728	277	261
Wuhan spider virus 8	Viruses	0	0	0	0	0
Xanthobacteraceae	Bacteria <prokaryotes>	5514	4273	4803	6618	11547
Xanthomonadaceae	Bacteria <prokaryotes>	9886	8409	8450	10005	12005
Xenococcaceae	Bacteria <prokaryotes>	46	31	45	35	64
Xylochloris	Eukaryota	0	0	0	0	0
Xylonomycetaceae	Eukaryota	0	1	0	1	1
Yellowstone Lake virophage 5	Viruses	15	19	26	28	47
Yellowstone Lake virophage 6	Viruses	27	104	8	2	3
Yellowstone Lake virophage 7	Viruses	1	1	0	0	0
Yersiniaceae	Bacteria <prokaryotes>	3276	3016	3981	2998	4060
Zetaproteobacteria bacterium TAG-1	Bacteria <prokaryotes>	70	68	71	8	30
Zoanthidae	Eukaryota	0	0	0	0	0
Zoogloeaceae	Bacteria <prokaryotes>	1350	832	763	1057	1572
Zygnemataceae	Eukaryota	0	0	0	0	0
[Clostridium] ultunense	Bacteria <prokaryotes>	63	25	55	29	200
archaeon enrichment culture clone 1(2010)	Archaea	0	0	0	0	0
bacterium 2013Arg42i	Bacteria <prokaryotes>	1	1	1	5	4
bacterium 2013Ark19i	Bacteria <prokaryotes>	0	0	2	3	0
bacterium A37T11	Bacteria <prokaryotes>	67	25	41	16	55
bacterium A52C2	Bacteria <prokaryotes>	2099	1554	1207	701	1307
bacterium JKG1	Bacteria <prokaryotes>	161	155	326	334	390
bacterium LF-3	Bacteria <prokaryotes>	13	17	38	15	13
bacterium MS4	Bacteria <prokaryotes>	110	89	122	54	111
bacterium OL-1	Bacteria <prokaryotes>	55	26	36	7	74
bacterium SIT5	Bacteria <prokaryotes>	20	14	33	69	99
bacterium SIT6	Bacteria <prokaryotes>	2	2	2	1	6
bacterium endosymbiont of Pedicinus badii	Bacteria <prokaryotes>	168	49	141	32	78
dsDNA viruses, no RNA stage	Viruses	701	464	408	329	159
halophilic archaeon DL31	Archaea	11	26	43	10	7
leotiomyceta	Eukaryota	0	0	0	0	0
methanogenic archaeon ISO4-H5	Archaea	171	75	88	55	51
sulfur-oxidizing symbionts	Bacteria <prokaryotes>	2038	2155	2144	2821	2714
unclassified Actinobacteria (class)	Bacteria <prokaryotes>	7	0	2	1	0
unclassified Actinobacteria (class) (miscellaneous)	Bacteria <prokaryotes>	2190	391	1889	503	1905
unclassified Actinomycetales (miscellaneous)	Bacteria <prokaryotes>	2	0	4	2	2
unclassified Alphaproteobacteria	Bacteria <prokaryotes>	28	4	4	7	10
unclassified Alphaproteobacteria (miscellaneous)	Bacteria <prokaryotes>	5857	4043	3481	6317	6328
unclassified Alteromonadales	Bacteria <prokaryotes>	235	639	446	1592	2310
unclassified Bacillales	Bacteria <prokaryotes>	4	2	0	0	0
unclassified Bacilli (miscellaneous)	Bacteria <prokaryotes>	19	10	4	2	12
unclassified Bacteria	Bacteria <prokaryotes>	8	9	19	6	20
unclassified Bacteroidales	Bacteria <prokaryotes>	4	20	33	6	9
unclassified Bacteroidales (miscellaneous)	Bacteria <prokaryotes>	703	783	1152	1729	2551
unclassified Bacteroidetes (miscellaneous)	Bacteria <prokaryotes>	84	130	240	160	105
unclassified Bacteroidetes/Chlorobi group	Bacteria <prokaryotes>	355	242	221	111	224
unclassified Betaproteobacteria	Bacteria <prokaryotes>	254	12	46	2	28
unclassified Betaproteobacteria (miscellaneous)	Bacteria <prokaryotes>	24914	29817	16834	32063	36916
unclassified Burkholderiales	Bacteria <prokaryotes>	161	179	85	264	171
unclassified Burkholderiales (miscellaneous)	Bacteria <prokaryotes>	440	360	279	456	926
unclassified Caudovirales	Viruses	69034	67371	61630	28257	23912
unclassified Chalmydiales (miscellaneous)	Bacteria <prokaryotes>	198	214	118	131	233
unclassified Clostridia (miscellaneous)	Bacteria <prokaryotes>	414	302	350	389	790
unclassified Clostridiales	Bacteria <prokaryotes>	69	25	22	13	49
unclassified Clostridiales (miscellaneous)	Bacteria <prokaryotes>	2448	2799	4621	3994	4193
unclassified Coriobacteriales	Bacteria <prokaryotes>	46	13	36	80	63
unclassified Cyanobacteria	Bacteria <prokaryotes>	18	3	11	4	5
unclassified Cyanobacteria (miscellaneous)	Bacteria <prokaryotes>	485	474	757	137	241
unclassified Deltaproteobacteria	Bacteria <prokaryotes>	318	345	412	279	533
unclassified Deltaproteobacteria (miscellaneous)	Bacteria <prokaryotes>	1035	768	953	656	1231
unclassified Firmicutes sensu stricto (miscellaneous)	Bacteria <prokaryotes>	22	7	21	32	43
unclassified Flavobacteriales (miscellaneous)	Bacteria <prokaryotes>	512	505	363	347	415
unclassified Frankiales (miscellaneous)	Bacteria <prokaryotes>	65	30	70	55	272
unclassified Gammaproteobacteria	Bacteria <prokaryotes>	14	7	12	34	21
unclassified Gammaproteobacteria (miscellaneous)	Bacteria <prokaryotes>	1366	1435	2422	1152	1199
unclassified Halobacteriales (miscellaneous)	Archaea	43	19	18	5	2
unclassified Micrococcales (miscellaneous)	Bacteria <prokaryotes>	45	94	152	329	603
unclassified Nitrosomonadales	Bacteria <prokaryotes>	121	245	646	114	51
unclassified Nostocales (miscellaneous)	Bacteria <prokaryotes>	2004	2251	2586	584	702
unclassified Oscillatoriales	Bacteria <prokaryotes>	0	0	0	0	0
unclassified Oscillatoriales (miscellaneous)	Bacteria <prokaryotes>	410	247	236	337	420
unclassified Rhizobiales	Bacteria <prokaryotes>	13	21	23	39	20
unclassified Rhizobiales (miscellaneous)	Bacteria <prokaryotes>	1047	527	672	824	902
unclassified Rhodobacterales	Bacteria <prokaryotes>	58	15	46	43	90
unclassified Rhodospirillales	Bacteria <prokaryotes>	1	0	0	0	0
unclassified Rhodospirillales (miscellaneous)	Bacteria <prokaryotes>	4612	4291	3782	8736	8029
unclassified Rickettsiales (miscellaneous)	Bacteria <prokaryotes>	215	105	103	212	231
unclassified Solirubrobacterales	Bacteria <prokaryotes>	161	97	202	101	174
unclassified Sphingobacteriales	Bacteria <prokaryotes>	50	25	43	24	43
unclassified Sphingobacteriales (miscellaneous)	Bacteria <prokaryotes>	566	493	622	221	508
unclassified Sphingomonadales	Bacteria <prokaryotes>	175	92	191	186	194
unclassified Thaumarchaeota	Archaea	246	189	249	357	1041
unclassified Thaumarchaeota (miscellaneous)	Archaea	28	68	101	276	768
unclassified Thermoplasmatales (miscellaneous)	Archaea	31	16	16	2	25
unclassified Thiotrichales	Bacteria <prokaryotes>	11	8	24	11	2
unclassified Tissierellia (miscellaneous)	Bacteria <prokaryotes>	15	10	22	33	63
unclassified Verrucomicrobia	Bacteria <prokaryotes>	107	77	107	30	84
unclassified Verrucomicrobia (miscellaneous)	Bacteria <prokaryotes>	42298	44989	47239	66171	80765
unclassified Vibrionales	Bacteria <prokaryotes>	52	18	16	53	50
unclassified pseudomonads	Bacteria <prokaryotes>	0	0	0	0	0
uncultured Termite group 1 bacterium	Bacteria <prokaryotes>	6	5	3	7	22
uncultured bacterium	Bacteria <prokaryotes>	0	0	0	0	0
uncultured bacterium AST3	Bacteria <prokaryotes>	0	0	0	0	0
uncultured bacterium BLR3	Bacteria <prokaryotes>	0	0	0	0	0
uncultured bacterium BLR9	Bacteria <prokaryotes>	0	0	0	0	0
uncultured bacterium HH1107	Bacteria <prokaryotes>	0	0	0	0	0
uncultured bacterium pMCBF6	Bacteria <prokaryotes>	0	0	0	0	0
uncultured crAssphage	Viruses	61	520	123	87	39

## Sheet: Free DNA
Family	Domain	HOT297_75m	Falkor_100m	HOT297_125m	Falkor_250m	HOT297_500m	HOT302_1000m
Abalone shriveling syndrome-associated virus	Viruses	3	5	8	3	1	0
Acanthamoebidae	Eukaryota	1320	767	1748	1512	1107	1872
Acanthasteridae	Eukaryota	174	52	400	311	225	476
Acanthisittidae	Eukaryota	1	0	3	12	2	20
Acanthogorgiidae	Eukaryota	0	0	0	0	0	0
Acaryochloridaceae	Bacteria <prokaryotes>	148	134	361	444	492	541
Accipitridae	Eukaryota	0	0	10	7	5	15
Acerentomidae	Eukaryota	0	0	0	0	0	1
Acetobacteraceae	Bacteria <prokaryotes>	6559	3242	6351	7644	12383	7396
Acholeplasmataceae	Bacteria <prokaryotes>	337	96	650	413	808	703
Acidaminococcaceae	Bacteria <prokaryotes>	334	249	433	427	286	405
Acidibacillus	Bacteria <prokaryotes>	56	0	159	203	132	199
Acidiferrobacteraceae	Bacteria <prokaryotes>	50	13	108	357	139	414
Acidilobaceae	Archaea	18	29	55	49	30	17
Acidimicrobiaceae	Bacteria <prokaryotes>	11417	514	9175	25682	6296	11346
Acidithiobacillaceae	Bacteria <prokaryotes>	486	460	907	630	529	630
Acidobacteriaceae	Bacteria <prokaryotes>	2917	1141	5137	7624	4750	7857
Acidothermaceae	Bacteria <prokaryotes>	390	778	321	208	27	82
Aciduliprofundum	Archaea	791	219	4720	8078	6300	6350
Acinetosporaceae	Eukaryota	0	0	1	0	0	4
Acroporidae	Eukaryota	231	66	1963	1178	962	2530
Actiniidae	Eukaryota	0	0	0	0	0	1
Actinobacteria bacterium IMCC19121	Bacteria <prokaryotes>	25	3	60	57	71	109
Actinobacteria bacterium IMCC25003	Bacteria <prokaryotes>	43	46	32	29	26	17
Actinobacteria bacterium IMCC26077	Bacteria <prokaryotes>	298	37	340	377	163	129
Actinobacteria bacterium IMCC26103	Bacteria <prokaryotes>	287	31	109	106	109	58
Actinomycetaceae	Bacteria <prokaryotes>	1094	407	1134	1281	848	927
Actinopolysporaceae	Bacteria <prokaryotes>	251	35	257	280	265	236
Actinospicaceae	Bacteria <prokaryotes>	11	1	59	70	4	35
Acytostelium	Eukaryota	181	75	439	399	275	591
Adenoviridae	Viruses	10	13	8	7	6	11
Adrianichthyidae	Eukaryota	10	3	110	91	57	154
Aerococcaceae	Bacteria <prokaryotes>	438	155	499	386	603	428
Aeromonadaceae	Bacteria <prokaryotes>	1684	927	2057	3071	4163	3565
Aeropyrum pernix spindle-shaped virus 1	Viruses	0	0	0	1	0	0
Agamidae	Eukaryota	3	0	40	38	18	74
Agaonidae	Eukaryota	21	5	55	64	47	114
Agaraceae	Eukaryota	0	0	0	0	0	1
Agaricaceae	Eukaryota	37	3	67	59	25	112
Ahnfeltiaceae	Eukaryota	0	0	1	3	3	3
Aiptasiidae	Eukaryota	326	130	1154	861	681	1459
Ajellomycetaceae	Eukaryota	4	0	29	18	13	61
Akkermansiaceae	Bacteria <prokaryotes>	154	88	331	853	538	554
Alariaceae	Eukaryota	0	0	1	0	1	1
Alcaligenaceae	Bacteria <prokaryotes>	6563	4992	7729	9624	8214	8333
Alcanivoracaceae	Bacteria <prokaryotes>	1598	2292	4927	15608	12671	13455
Alcyoniidae	Eukaryota	37	0	32	2	4	0
Aleyrodidae	Eukaryota	60	11	133	120	156	267
Algiphilaceae	Bacteria <prokaryotes>	223	168	305	571	493	581
Alicyclobacillaceae	Bacteria <prokaryotes>	1534	666	2945	3588	1705	2817
Alkalimonas	Bacteria <prokaryotes>	99	36	194	256	355	529
Alligatoridae	Eukaryota	7	0	42	32	14	58
Alloherpesviridae	Viruses	0	0	2	0	2	3
Alteromonadaceae	Bacteria <prokaryotes>	13053	60170	45957	169756	126938	46577
Amborellaceae	Eukaryota	31	4	112	106	43	160
Amoebophilaceae	Bacteria <prokaryotes>	63	26	88	63	90	128
Amphibolidae	Eukaryota	0	0	0	0	0	0
Anaerocellum group	Bacteria <prokaryotes>	21	1	68	63	33	89
Anaerolineaceae	Bacteria <prokaryotes>	3234	948	10384	8724	3740	8241
Anaeromyxobacteraceae	Bacteria <prokaryotes>	618	285	1039	1812	779	1918
Anaerovirgula	Bacteria <prokaryotes>	65	117	267	184	201	247
Anaplasmataceae	Bacteria <prokaryotes>	2144	902	2076	2550	7116	2896
Anatidae	Eukaryota	18	16	19	12	9	42
Ancylostomatidae	Eukaryota	64	4	140	71	61	154
Andalucia	Eukaryota	12	0	29	24	35	99
Andrognathidae	Eukaryota	0	0	0	0	0	0
Aneuraceae	Eukaryota	0	0	0	0	0	6
Anisakidae	Eukaryota	0	0	0	0	0	0
Aotidae	Eukaryota	1	0	2	19	8	19
Aphalaridae	Eukaryota	1	0	0	0	0	0
Aphanizomenonaceae	Bacteria <prokaryotes>	1526	953	2014	1258	1999	1735
Aphanothecaceae	Bacteria <prokaryotes>	660	191	1499	2514	1790	2090
Aphididae	Eukaryota	160	69	378	351	265	639
Apiaceae	Eukaryota	52	24	168	139	73	230
Apidae	Eukaryota	180	31	425	354	435	741
Apis mellifera filamentous virus	Viruses	1	0	0	0	0	0
Aplysiidae	Eukaryota	115	39	333	265	213	511
Aplysinidae	Eukaryota	0	0	1	0	0	0
Apodidae	Eukaryota	0	0	14	50	10	47
Apterygidae	Eukaryota	2	3	12	12	8	32
Apusomonadidae	Eukaryota	170	41	774	693	343	1007
Aquificaceae	Bacteria <prokaryotes>	2526	1021	2612	2033	1856	2255
Archaeoglobaceae	Archaea	2295	1155	3559	4256	3226	3342
Archangiaceae	Bacteria <prokaryotes>	2819	2109	4302	6315	3547	6847
Ardeidae	Eukaryota	0	0	0	0	0	3
Ardenticatenaceae	Bacteria <prokaryotes>	1284	240	6627	6619	1996	5552
Arecaceae	Eukaryota	112	38	198	172	112	226
Armatimonadetes bacterium DC	Bacteria <prokaryotes>	29	135	294	415	141	444
Armatimonadetes bacterium GBS	Bacteria <prokaryotes>	0	0	5	21	1	8
Armatimonadetes bacterium GXS	Bacteria <prokaryotes>	38	0	99	183	166	210
Arthrodermataceae	Eukaryota	20	10	41	16	45	68
Ascoideaceae	Eukaryota	23	0	26	17	31	61
Ascoviridae	Viruses	8	3	8	10	20	6
Asfarviridae	Viruses	5	4	10	9	9	1
Asparagaceae	Eukaryota	24	2	114	70	29	134
Aspergillaceae	Eukaryota	70	12	263	247	137	373
Asteraceae	Eukaryota	108	24	345	278	78	421
Athyriaceae	Eukaryota	0	0	0	0	0	0
Atopobiaceae	Bacteria <prokaryotes>	358	173	516	446	325	321
Atribacteria bacterium JGI 0000014-F07	Bacteria <prokaryotes>	144	7	574	682	385	770
Aulacidae	Eukaryota	0	0	0	0	0	1
Aurantimonadaceae	Bacteria <prokaryotes>	6990	3527	3968	4513	4708	2859
Aureococcus	Eukaryota	1341	2364	13524	12781	3073	16981
Aureoumbra	Eukaryota	135	26	53	22	28	163
Auriculariaceae	Eukaryota	41	1	115	91	52	148
Azonexaceae	Bacteria <prokaryotes>	751	387	519	512	463	661
Babesiidae	Eukaryota	224	74	285	107	117	391
Bacillaceae	Bacteria <prokaryotes>	31903	19154	46367	37963	32657	40953
Bacillales Family X. Incertae Sedis	Bacteria <prokaryotes>	126	25	193	149	49	165
Bacillales Family XI. Incertae Sedis	Bacteria <prokaryotes>	195	20	333	263	287	302
Bacillales Family XII. Incertae Sedis	Bacteria <prokaryotes>	317	84	385	407	436	445
Bacillariaceae	Eukaryota	15	3	43	21	9	82
Bacillus phage BalMu-1	Viruses	0	0	0	0	0	0
Bacteriovoracaceae	Bacteria <prokaryotes>	2445	1368	3776	5385	5953	5680
Bacteroidaceae	Bacteria <prokaryotes>	3556	2441	4067	2638	3383	3726
Baculoviridae	Viruses	48	14	44	28	27	58
Balaenopteridae	Eukaryota	2	0	7	4	6	14
Balneolaceae	Bacteria <prokaryotes>	3066	1123	10683	14477	14232	21293
Bangiaceae	Eukaryota	10	0	27	16	22	66
Barnesiellaceae	Bacteria <prokaryotes>	35	16	188	204	182	238
Bartonellaceae	Bacteria <prokaryotes>	2625	1289	2020	2031	2982	2063
Bathycoccaceae	Eukaryota	2069	742	17214	7479	3284	10089
Bathyergidae	Eukaryota	1	1	19	8	26	47
Batrachochytrium	Eukaryota	62	1	201	92	63	267
Batrachospermaceae	Eukaryota	2	0	9	1	5	9
Bauldia	Bacteria <prokaryotes>	581	136	589	999	909	1089
Bdellovibrionaceae	Bacteria <prokaryotes>	7999	4663	6138	4411	9598	5094
Beihai weivirus-like virus 4	Viruses	0	0	0	0	0	0
Beijerinckiaceae	Bacteria <prokaryotes>	997	382	1134	1515	2378	1649
Berkeleyaceae	Eukaryota	0	1	4	3	2	12
Bernardetiaceae	Bacteria <prokaryotes>	342	127	705	739	752	1085
Beutenbergiaceae	Bacteria <prokaryotes>	5	0	43	63	10	51
Bicaudaviridae	Viruses	0	0	2	1	0	0
Bifidobacteriaceae	Bacteria <prokaryotes>	1039	588	924	622	626	594
Bifurcata	Eukaryota	0	0	9	0	1	17
Bigelowiella	Eukaryota	8	0	1	0	3	2
Blastocladiaceae	Eukaryota	0	0	0	1	0	1
Blastocystis	Eukaryota	913	738	912	489	363	792
Blattabacteriaceae	Bacteria <prokaryotes>	373	166	343	202	545	446
Boldiaceae	Eukaryota	1	0	9	2	2	6
Bolinopsidae	Eukaryota	0	0	1	1	1	1
Bombycidae	Eukaryota	138	56	155	76	86	163
Bondarzewiaceae	Eukaryota	1	4	13	17	9	29
Bonnemaisoniaceae	Eukaryota	0	0	0	0	0	0
Borreliaceae	Bacteria <prokaryotes>	741	124	349	336	253	329
Bostrichidae	Eukaryota	0	0	0	0	0	0
Botryococcaceae	Eukaryota	0	0	1	0	1	1
Botryosphaeriaceae	Eukaryota	56	13	66	36	29	82
Bovidae	Eukaryota	131	33	219	399	353	443
Brachyspiraceae	Bacteria <prokaryotes>	745	277	928	637	1023	1167
Braconidae	Eukaryota	120	89	375	306	179	594
Bracteacoccaceae	Eukaryota	0	0	1	1	0	0
Bradyrhizobiaceae	Bacteria <prokaryotes>	18079	10552	20385	23633	21301	23919
Branchiostomidae	Eukaryota	586	291	1276	1088	827	1857
Brassicaceae	Eukaryota	454	70	899	618	631	1102
Brevibacteriaceae	Bacteria <prokaryotes>	420	204	376	462	240	270
Brevinemataceae	Bacteria <prokaryotes>	125	34	100	65	40	63
Bromeliaceae	Eukaryota	57	10	110	94	60	163
Brucella phage BiPBO1	Viruses	8	0	0	0	1	0
Brucellaceae	Bacteria <prokaryotes>	1927	1187	1956	2051	3486	1960
Bryobacteraceae	Bacteria <prokaryotes>	177	49	560	868	242	885
Bryopsidaceae	Eukaryota	2	0	0	0	0	4
Bucerotidae	Eukaryota	2	4	3	5	5	8
Budviciaceae	Bacteria <prokaryotes>	47	28	77	94	115	202
Buprestidae	Eukaryota	63	29	113	80	70	160
Burkholderiaceae	Bacteria <prokaryotes>	29933	19915	22364	22129	34163	19484
Burkholderiales Genera incertae sedis	Bacteria <prokaryotes>	1869	1280	2122	3722	3658	3252
Caedibacter	Bacteria <prokaryotes>	867	561	784	1063	911	738
Caenogastropoda	Eukaryota	0	0	0	0	1	0
Calanidae	Eukaryota	0	0	7	15	9	26
Caldicoprobacteraceae	Bacteria <prokaryotes>	198	185	590	593	181	574
Caldilineaceae	Bacteria <prokaryotes>	374	32	2147	2777	1028	2708
Caldisericaceae	Bacteria <prokaryotes>	298	66	256	255	218	260
Caldisphaeraceae	Archaea	26	4	96	28	24	59
Calditrichaceae	Bacteria <prokaryotes>	5867	2957	18717	28882	18214	39975
Callorhinchidae	Eukaryota	85	15	126	74	57	172
Callyspongiidae	Eukaryota	0	0	0	1	0	1
Cambaridae	Eukaryota	0	0	0	0	0	0
Camelidae	Eukaryota	20	21	31	31	19	45
Campanulaceae	Eukaryota	1	0	0	1	0	0
Campanulariidae	Eukaryota	0	0	1	0	0	1
Campylobacteraceae	Bacteria <prokaryotes>	13697	7882	11657	7570	11341	9363
Candidatus Accumulibacter	Bacteria <prokaryotes>	26	0	53	138	80	150
Candidatus Azobacteroides	Bacteria <prokaryotes>	23	8	87	66	80	138
Candidatus Babela	Bacteria <prokaryotes>	122	11	111	48	57	84
Candidatus Baumannia	Bacteria <prokaryotes>	14	5	28	32	73	59
Candidatus Brocadiaceae	Bacteria <prokaryotes>	2407	1426	3497	3810	2532	3425
Candidatus Chrysopegis	Bacteria <prokaryotes>	842	175	4962	7319	4798	10925
Candidatus Cloacimonas	Bacteria <prokaryotes>	523	341	2344	3497	1754	4792
Candidatus Desulfofervidaceae	Bacteria <prokaryotes>	540	174	885	717	981	820
Candidatus Entotheonella	Bacteria <prokaryotes>	3222	559	39049	42404	5624	30981
Candidatus Hepatobacter	Bacteria <prokaryotes>	77	14	29	39	54	34
Candidatus Izimaplasma	Bacteria <prokaryotes>	28	7	118	99	65	126
Candidatus Korarchaeum	Archaea	131	93	176	250	217	212
Candidatus Kryptobacter	Bacteria <prokaryotes>	829	188	5502	9067	4979	12368
Candidatus Kryptonium	Bacteria <prokaryotes>	748	105	5672	9369	7244	13695
Candidatus Methanoperedenaceae	Archaea	1389	710	1098	1558	1205	1368
Candidatus Micrarchaeota archaeon Mia14	Archaea	83	14	54	38	35	43
Candidatus Midichloriaceae	Bacteria <prokaryotes>	361	15	465	533	818	790
Candidatus Nanopelagicus	Bacteria <prokaryotes>	442	12	269	404	367	219
Candidatus Nasuia	Bacteria <prokaryotes>	2	0	2	3	1	1
Candidatus Nitrosopelagicus	Archaea	6988	695	139771	48223	44211	48728
Candidatus Nitrosotenuis	Archaea	655	146	5095	2799	16713	7290
Candidatus Nucleicultrix	Bacteria <prokaryotes>	509	37	811	692	1317	991
Candidatus Paracaedibacteraceae	Bacteria <prokaryotes>	788	497	1052	1362	1589	1267
Candidatus Planktophila	Bacteria <prokaryotes>	1545	605	1170	940	2964	512
Candidatus Profftella	Bacteria <prokaryotes>	14	0	6	18	9	24
Candidatus Ruthia	Bacteria <prokaryotes>	827	859	741	161	374	341
Candidatus Saccharibacteria oral taxon TM7x	Bacteria <prokaryotes>	26	5	66	34	92	57
Candidatus Sulcia	Bacteria <prokaryotes>	39	31	80	41	308	80
Candidatus Symbiothrix	Bacteria <prokaryotes>	71	9	21	43	30	35
Candidatus Thiodiazotropha	Bacteria <prokaryotes>	1374	474	1920	3431	2442	4021
Candidatus Thioglobus	Bacteria <prokaryotes>	7985	200	13942	9158	13784	8529
Candidatus Tremblaya	Bacteria <prokaryotes>	0	0	0	1	0	0
Candidatus Walczuchella	Bacteria <prokaryotes>	578	601	268	81	230	32
Candidatus Xiphinematobacter	Bacteria <prokaryotes>	40	19	47	74	56	49
Canidae	Eukaryota	1	0	10	9	1	10
Caprimulgidae	Eukaryota	0	0	2	6	2	2
Capsaspora	Eukaryota	217	81	619	474	274	714
Cardiobacteriaceae	Bacteria <prokaryotes>	223	36	432	566	904	1299
Cariamidae	Eukaryota	2	0	10	10	10	33
Caricaceae	Eukaryota	23	0	40	24	15	63
Carnobacteriaceae	Bacteria <prokaryotes>	805	339	1069	1022	971	1168
Carteria	Eukaryota	0	0	0	0	0	0
Caryophyllaceae	Eukaryota	0	0	0	0	0	0
Caryophylliidae	Eukaryota	0	0	0	0	1	0
Castoridae	Eukaryota	12	6	29	19	8	32
Catabacteriaceae	Bacteria <prokaryotes>	44	3	40	43	16	44
Catalimonadaceae	Bacteria <prokaryotes>	975	556	835	1198	930	1477
Catenulisporaceae	Bacteria <prokaryotes>	40	21	78	120	68	190
Caulerpaceae	Eukaryota	4	0	9	5	7	8
Caulobacteraceae	Bacteria <prokaryotes>	6372	2798	5976	7757	7545	9184
Caviidae	Eukaryota	4	1	24	13	8	46
Cebidae	Eukaryota	6	2	30	57	43	72
Cecidomyiidae	Eukaryota	0	0	0	1	0	0
Cellulomonadaceae	Bacteria <prokaryotes>	414	146	488	886	423	478
Cellulophaga phage phi48:2	Viruses	14	0	10	1	2	0
Cellvibrionaceae	Bacteria <prokaryotes>	4118	1643	8963	15168	21365	29872
Centropomidae	Eukaryota	12	2	35	34	15	53
Cephidae	Eukaryota	15	1	48	66	44	111
Cerambycidae	Eukaryota	59	6	147	113	47	229
Ceramiaceae	Eukaryota	0	0	9	4	7	7
Cercopithecidae	Eukaryota	26	13	153	493	104	327
Cervidae	Eukaryota	1	0	9	8	4	5
Chaetocerotaceae	Eukaryota	3	0	27	14	28	80
Chaetomiaceae	Eukaryota	30	3	137	52	54	126
Chaetopeltidaceae	Eukaryota	0	0	0	1	0	0
Chaetosphaeridiaceae	Eukaryota	0	0	2	1	0	11
Chamaesiphonaceae	Bacteria <prokaryotes>	75	53	138	187	90	148
Chamaetrichon	Eukaryota	1	1	0	3	4	0
Champiaceae	Eukaryota	4	0	2	1	0	4
Characeae	Eukaryota	0	0	1	0	3	3
Characidae	Eukaryota	88	33	56	59	47	88
Charadriidae	Eukaryota	0	0	1	2	2	1
Chattonellaceae	Eukaryota	13	1	69	37	11	331
Cheirogaleidae	Eukaryota	1	0	12	12	8	19
Chelatococcaceae	Bacteria <prokaryotes>	4827	4768	1290	1078	1532	588
Cheloniidae	Eukaryota	71	6	54	27	24	39
Chenopodiaceae	Eukaryota	185	69	430	312	172	454
Chinchillidae	Eukaryota	5	0	14	12	5	13
Chironomidae	Eukaryota	0	0	0	0	0	1
Chitinivibrionaceae	Bacteria <prokaryotes>	167	11	300	329	253	580
Chitinophagaceae	Bacteria <prokaryotes>	7479	6016	9772	10056	11024	14842
Chlamydiaceae	Bacteria <prokaryotes>	1871	695	890	474	320	369
Chlamydomonadaceae	Eukaryota	212	68	509	353	264	678
Chloracidobacterium	Bacteria <prokaryotes>	246	101	648	1097	565	1230
Chlorellaceae	Eukaryota	429	86	1333	919	1500	1824
Chlorobiaceae	Bacteria <prokaryotes>	3293	2064	8463	11081	8552	15684
Chlorodendraceae	Eukaryota	0	0	2	2	0	3
Chloroflexaceae	Bacteria <prokaryotes>	598	90	2893	3516	894	2970
Chlorogloeopsidaceae	Bacteria <prokaryotes>	477	225	203	169	292	332
Chlorokybaceae	Eukaryota	0	0	0	6	0	6
Chondrillidae	Eukaryota	0	0	0	0	0	1
Chordariaceae	Eukaryota	1	0	3	1	0	8
Choreocolacaceae	Eukaryota	0	0	4	6	1	14
Christensenellaceae	Bacteria <prokaryotes>	71	18	158	197	95	225
Chromatiaceae	Bacteria <prokaryotes>	6478	2589	7212	9941	9423	11272
Chromobacteriaceae	Bacteria <prokaryotes>	2988	1979	3032	3210	3888	3546
Chromochloridaceae	Eukaryota	0	0	0	0	0	1
Chromulinaceae	Eukaryota	3	0	7	5	7	68
Chroococcaceae	Bacteria <prokaryotes>	986	461	1566	1324	1317	1843
Chroococcidiopsidaceae	Bacteria <prokaryotes>	221	31	375	591	410	680
Chroomonadaceae	Eukaryota	0	7	14	2	1	40
Chryseolinea	Bacteria <prokaryotes>	684	309	628	761	887	1114
Chrysiogenaceae	Bacteria <prokaryotes>	200	90	425	604	538	782
Chrysobalanaceae	Eukaryota	0	0	2	0	0	0
Chrysochloridae	Eukaryota	63	51	33	25	15	47
Chrysopidae	Eukaryota	0	0	0	0	0	1
Chthoniobacteraceae	Bacteria <prokaryotes>	520	251	1327	3034	1336	2362
Chthonomonadaceae	Bacteria <prokaryotes>	493	170	1754	2420	611	2041
Cicadellidae	Eukaryota	0	0	0	0	0	0
Cichlidae	Eukaryota	45	10	265	344	167	485
Cimicidae	Eukaryota	63	2	118	102	67	251
Cionidae	Eukaryota	72	11	312	337	191	583
Circoviridae	Viruses	1	2	14	2	0	7
Circovirus-like genome RW-C	Viruses	0	0	2	0	0	1
Circovirus-like genome SAR-A	Viruses	0	0	0	0	0	0
Clavicipitaceae	Eukaryota	46	16	151	115	71	245
Cleomaceae	Eukaryota	25	15	94	56	44	123
Closteriaceae	Eukaryota	0	0	2	4	3	4
Clostridiaceae	Bacteria <prokaryotes>	20257	8316	27519	21412	21520	26526
Clostridiales Family XII. Incertae Sedis	Bacteria <prokaryotes>	96	55	410	378	208	331
Clostridiales Family XIII. Incertae Sedis	Bacteria <prokaryotes>	240	131	595	523	479	693
Clostridiales Family XVI. Incertae Sedis	Bacteria <prokaryotes>	400	107	732	720	372	654
Clostridiales Family XVII. Incertae Sedis	Bacteria <prokaryotes>	575	125	874	1189	468	805
Clostridium phage phiCT19406C	Viruses	0	0	0	0	2	0
Clostridium phage phiCT453A	Viruses	0	0	4	0	0	0
Clostridium phage phiCTC2A	Viruses	1	4	13	0	1	0
Clupeidae	Eukaryota	329	129	262	113	99	184
Coccidioides	Eukaryota	25	3	26	19	20	18
Coccomyxaceae	Eukaryota	183	35	554	406	233	722
Coelacanthidae	Eukaryota	46	6	122	126	67	240
Cohaesibacteraceae	Bacteria <prokaryotes>	375	77	405	680	607	641
Coleochaetaceae	Eukaryota	0	0	5	3	1	4
Coleofasciculaceae	Bacteria <prokaryotes>	420	164	821	1119	857	1152
Coliidae	Eukaryota	1	0	11	4	4	18
Colletidae	Eukaryota	0	0	6	0	0	2
Collodictyonidae	Eukaryota	1	0	13	8	139	31
Colubridae	Eukaryota	4	1	35	33	21	46
Columbidae	Eukaryota	3	4	18	7	1	17
Colwelliaceae	Bacteria <prokaryotes>	2328	601	4611	9327	7922	11471
Comamonadaceae	Bacteria <prokaryotes>	18427	10303	14958	13663	23099	14154
Competibacteraceae	Bacteria <prokaryotes>	1160	562	848	1403	922	1510
Compsopogonaceae	Eukaryota	2	0	41	11	58	54
Conexibacteraceae	Bacteria <prokaryotes>	539	135	800	818	331	579
Conidae	Eukaryota	0	0	1	1	1	2
Coniophoraceae	Eukaryota	32	6	38	21	20	57
Coniosporium <Dothideomycetes incertae sedis>	Eukaryota	9	2	38	34	12	42
Convolvulaceae	Eukaryota	34	2	138	100	93	262
Corallinaceae	Eukaryota	1	0	8	3	5	11
Cordycipitaceae	Eukaryota	23	11	43	35	9	39
Coriobacteriaceae	Bacteria <prokaryotes>	229	186	254	240	208	227
Corvidae	Eukaryota	15	0	17	14	5	12
Corydalidae	Eukaryota	0	0	0	0	0	0
Corynebacteriaceae	Bacteria <prokaryotes>	2536	912	1436	1765	1049	974
Coscinodiscaceae	Eukaryota	0	0	0	1	1	16
Coxiellaceae	Bacteria <prokaryotes>	2141	442	3341	4385	5843	7879
Crambidae	Eukaryota	0	0	0	0	0	0
Crenotrichaceae	Bacteria <prokaryotes>	520	62	462	673	427	669
Criblamydiaceae	Bacteria <prokaryotes>	293	121	198	201	194	360
Cricetidae	Eukaryota	9	9	54	28	12	72
Crocinitomicaceae	Bacteria <prokaryotes>	1270	515	5259	7637	16780	20849
Crocodylidae <all crocodiles>	Eukaryota	10	2	7	9	5	18
Cryomorphaceae	Bacteria <prokaryotes>	379	130	2052	2829	4972	6156
Cryptococcaceae	Eukaryota	114	44	213	178	108	298
Cryptomonadaceae	Eukaryota	7	3	21	7	10	29
Cryptosporangiaceae	Bacteria <prokaryotes>	53	2	132	210	65	177
Cryptosporidiidae	Eukaryota	111	40	373	101	78	521
Ctenophore-associated circular virus 4	Viruses	0	0	2	0	0	0
Cuculidae	Eukaryota	1	0	13	14	8	24
Cucurbitaceae	Eukaryota	107	28	174	141	136	236
Culex mononega-like virus 2	Viruses	0	0	0	0	0	0
Culicidae	Eukaryota	141	67	372	339	238	562
Cuniculiplasmataceae	Archaea	76	0	268	356	290	303
Cuniculitremaceae	Eukaryota	32	7	45	59	68	88
Cupressaceae	Eukaryota	0	1	0	0	0	0
Curculionidae	Eukaryota	75	12	89	85	53	159
Cyanidiaceae	Eukaryota	335	70	865	602	425	1123
Cyanobacteriaceae	Bacteria <prokaryotes>	498	230	456	328	375	580
Cyanophage KBS-P-1A	Viruses	690	478	374	111	255	24
Cyanophage KBS-S-2A	Viruses	6667	3446	4237	481	627	132
Cyanophage MED4-117	Viruses	14858	4418	3436	840	1575	284
Cyanophage Syn30	Viruses	6765	8411	4330	1290	5191	883
Cyanophoraceae	Eukaryota	3	0	39	2	72	52
Cyanoptyche	Eukaryota	0	0	1	0	2	4
Cyanothecaceae	Bacteria <prokaryotes>	3110	2467	2065	1516	1636	1588
Cyclobacteriaceae	Bacteria <prokaryotes>	2819	1208	7340	9873	11665	14948
Cyclopettidae	Eukaryota	0	0	0	1	2	4
Cymbomonas	Eukaryota	0	0	2	1	0	7
Cynocephalidae	Eukaryota	26	16	19	18	17	31
Cynoglossidae	Eukaryota	43	4	135	62	22	97
Cyphellophoraceae	Eukaryota	60	6	30	25	17	37
Cypridinidae	Eukaryota	0	0	0	0	1	0
Cyprinidae	Eukaryota	94	13	284	255	188	496
Cyprinodontidae	Eukaryota	6	1	22	17	14	44
Cytophagaceae	Bacteria <prokaryotes>	11525	7676	15584	15445	18465	24769
Dacryobolaceae	Eukaryota	1	0	8	2	2	7
Dactyloidae	Eukaryota	10	1	77	74	29	130
Daphniidae	Eukaryota	0	0	0	0	0	0
Dasyaceae	Eukaryota	1	0	2	1	1	5
Dasypodidae	Eukaryota	2	0	10	14	7	39
Dasyuridae	Eukaryota	26	13	30	22	19	34
Debaryomycetaceae	Eukaryota	414	15	874	648	713	927
Deep-sea thermophilic phage D6E	Viruses	0	1	1	3	4	1
Deferribacteraceae	Bacteria <prokaryotes>	4436	2295	4277	4280	4204	5066
Deferrisoma	Bacteria <prokaryotes>	567	349	1581	1748	979	2113
Defluviitaleaceae	Bacteria <prokaryotes>	87	13	372	282	236	568
Defluviitoga	Bacteria <prokaryotes>	111	13	191	191	316	286
Dehalococcoidaceae	Bacteria <prokaryotes>	1093	385	17613	9623	833	8917
Dehalogenimonas	Bacteria <prokaryotes>	708	152	16722	11053	804	9017
Deinococcaceae	Bacteria <prokaryotes>	2476	577	2286	2666	1748	2331
Delesseriaceae	Eukaryota	11	8	8	4	3	9
Delphacidae	Eukaryota	89	12	232	171	124	311
Delphinidae	Eukaryota	1	0	2	6	0	2
Demequinaceae	Bacteria <prokaryotes>	489	75	407	691	351	547
Demodicidae	Eukaryota	0	0	0	0	0	0
Dermabacteraceae	Bacteria <prokaryotes>	289	41	173	294	235	170
Dermacoccaceae	Bacteria <prokaryotes>	146	40	168	179	1033	109
Dermateaceae	Eukaryota	29	9	21	14	6	19
Dermatophilaceae	Bacteria <prokaryotes>	165	116	79	148	47	85
Dermocarpellaceae	Bacteria <prokaryotes>	223	108	294	233	282	287
Desertifilaceae	Bacteria <prokaryotes>	149	24	222	361	130	272
Desmarestiaceae	Eukaryota	0	0	0	0	0	3
Desulfarculaceae	Bacteria <prokaryotes>	1375	784	1773	2319	1460	1812
Desulfobacteraceae	Bacteria <prokaryotes>	16281	11180	17092	16253	13027	17992
Desulfobulbaceae	Bacteria <prokaryotes>	1455	739	3005	4783	3452	5839
Desulfohalobiaceae	Bacteria <prokaryotes>	699	216	1549	2124	1634	2336
Desulfomicrobiaceae	Bacteria <prokaryotes>	660	209	624	759	591	830
Desulfonatronaceae	Bacteria <prokaryotes>	233	55	580	804	601	1039
Desulfovibrionaceae	Bacteria <prokaryotes>	30279	22548	16024	12925	11635	11019
Desulfurellaceae	Bacteria <prokaryotes>	975	197	1386	1407	1214	1804
Desulfuribacillus	Bacteria <prokaryotes>	169	45	395	340	274	417
Desulfurobacteriaceae	Bacteria <prokaryotes>	1698	473	2319	1920	2040	2761
Desulfurococcaceae	Archaea	449	267	537	670	631	630
Desulfuromonadaceae	Bacteria <prokaryotes>	2435	1123	5173	7544	4491	8550
Dethiosulfatibacter	Bacteria <prokaryotes>	39	2	152	215	158	238
Diatrypaceae	Eukaryota	113	14	47	15	23	36
Dicloster	Eukaryota	0	0	1	0	0	2
Dicroglossidae	Eukaryota	14	11	68	75	58	133
Dictyoglomaceae	Bacteria <prokaryotes>	2079	415	2245	2106	1439	2185
Dictyostelium	Eukaryota	1110	552	1618	961	887	1380
Dictyotaceae	Eukaryota	1	0	3	1	0	9
Didelphidae	Eukaryota	5	6	29	27	7	40
Didymosphaeriaceae	Eukaryota	19	3	11	17	30	25
Dietziaceae	Bacteria <prokaryotes>	56	0	61	150	47	121
Dipodascaceae	Eukaryota	71	34	84	44	23	129
Dipodidae	Eukaryota	3	0	24	13	7	36
Diprionidae	Eukaryota	67	40	109	42	26	116
Dissulfuribacter	Bacteria <prokaryotes>	328	98	733	1012	785	1280
Ditrysia	Eukaryota	5	2	11	11	8	39
Dixoniellaceae	Eukaryota	0	3	8	0	2	8
Dragonfly cyclicusvirus	Viruses	0	0	0	0	0	0
Dragonfly larvae associated circular virus-10	Viruses	0	0	1	0	0	0
Drosophilidae	Eukaryota	342	267	737	749	720	1077
Dunaliella viridis virus SI2	Viruses	137	114	82	72	151	127
Dunaliellaceae	Eukaryota	0	0	0	0	0	1
Dysgonamonadaceae	Bacteria <prokaryotes>	605	287	978	1008	1775	1695
Ectocarpaceae	Eukaryota	2	0	4	0	2	23
Ectothiorhodospiraceae	Bacteria <prokaryotes>	8371	4273	10301	18028	11603	20185
Edwardsiidae	Eukaryota	334	143	1085	643	439	1028
Eggerthellaceae	Bacteria <prokaryotes>	576	159	460	710	427	468
Eimeriidae	Eukaryota	89	13	439	221	92	724
Elateridae	Eukaryota	0	0	0	0	1	1
Elephantidae	Eukaryota	2	0	14	21	11	32
Elioraea	Bacteria <prokaryotes>	133	54	224	452	257	570
Elliptochloris	Eukaryota	0	0	0	0	0	0
Elusimicrobiaceae	Bacteria <prokaryotes>	167	100	233	255	203	316
Embiotocidae	Eukaryota	0	0	0	0	0	0
Embryophyta	Eukaryota	89	28	249	213	131	320
Emydidae	Eukaryota	105	0	89	29	64	77
Encyrtidae	Eukaryota	32	2	159	85	74	185
Endomicrobiaceae	Bacteria <prokaryotes>	213	37	240	252	291	330
Enhydrobacter	Bacteria <prokaryotes>	588	235	1145	2040	1243	2368
Entamoebidae	Eukaryota	130	30	208	96	166	270
Enterobacteriaceae	Bacteria <prokaryotes>	17088	11085	11059	7320	12097	7380
Enterococcaceae	Bacteria <prokaryotes>	1480	1044	1860	1290	1288	1277
Enterocytozoonidae	Eukaryota	66	15	39	10	47	52
Entomoplasmataceae	Bacteria <prokaryotes>	119	24	93	88	78	107
Ephedraceae	Eukaryota	7	1	2	0	0	0
Epulopiscium	Bacteria <prokaryotes>	16	3	48	126	64	81
Equidae	Eukaryota	6	10	23	11	6	19
Equisetaceae	Eukaryota	0	0	0	0	0	1
Eremoneura	Eukaryota	3	0	23	15	10	48
Ergasilidae	Eukaryota	0	0	0	8	4	9
Erinaceidae	Eukaryota	24	1	47	36	29	36
Erwinia phage vB_EamM_Caitlin	Viruses	1	2	2	0	2	1
Erwiniaceae	Bacteria <prokaryotes>	1486	596	1889	1710	2899	2951
Erysipelotrichaceae	Bacteria <prokaryotes>	2339	1182	1745	1345	1384	1372
Erythrobacteraceae	Bacteria <prokaryotes>	10838	26260	12128	31544	14608	25676
Erythrotrichiaceae	Eukaryota	0	0	2	1	2	8
Esocidae	Eukaryota	39	15	60	56	22	89
Estrildidae	Eukaryota	10	8	10	11	9	10
Ettlia	Eukaryota	0	0	0	1	0	1
Eubacteriaceae	Bacteria <prokaryotes>	1999	804	2208	2145	2166	2325
Euglenaceae	Eukaryota	1	0	1	1	2	6
Eukaryota sp. BB2	Eukaryota	0	0	0	0	1	1
Eumetazoa	Eukaryota	162	35	469	365	260	867
Eunotiaceae	Eukaryota	3	4	5	5	5	29
Euphorbiaceae	Eukaryota	258	77	369	263	387	622
Eupodiscaceae	Eukaryota	2	0	10	4	1	35
Eurypygidae	Eukaryota	0	0	2	1	2	3
Ezakiella	Bacteria <prokaryotes>	46	3	147	18	44	62
FCB group	Bacteria <prokaryotes>	96	54	423	551	345	708
Fabaceae	Eukaryota	377	69	1186	875	805	1590
Falconidae	Eukaryota	5	0	14	16	6	11
Fangia	Bacteria <prokaryotes>	2064	2924	1289	716	1252	1579
Felidae	Eukaryota	3	1	12	24	21	25
Fenollaria	Bacteria <prokaryotes>	11	8	38	52	37	33
Ferrimonadaceae	Bacteria <prokaryotes>	478	274	1104	1688	2391	2613
Ferroplasmaceae	Archaea	236	159	434	555	479	451
Ferrovaceae	Bacteria <prokaryotes>	219	57	432	468	761	735
Fervidobacteriaceae	Bacteria <prokaryotes>	1715	266	1649	1817	1621	1738
Fibrobacteraceae	Bacteria <prokaryotes>	802	659	1270	1446	898	1623
Fibroporia	Eukaryota	36	8	43	28	25	60
Fimbriimonadaceae	Bacteria <prokaryotes>	351	103	496	773	450	769
Flammeovirgaceae	Bacteria <prokaryotes>	12360	7951	19135	23289	38688	38263
Flavobacteria bacterium BBFL7	Bacteria <prokaryotes>	96	28	132	192	346	329
Flavobacteria bacterium MS024-2A	Bacteria <prokaryotes>	4364	333	8681	28147	15862	11174
Flavobacteria bacterium MS024-3C	Bacteria <prokaryotes>	178	8	447	853	858	776
Flavobacteriaceae	Bacteria <prokaryotes>	71705	49677	125164	157518	301707	212401
Flavobacterium phage Fpv20	Viruses	11	21	9	7	7	1
Flavobacterium phage Fpv3	Viruses	29	132	73	35	27	10
Flavonifractor	Bacteria <prokaryotes>	417	256	435	301	183	180
Fonticula	Eukaryota	47	6	97	58	44	148
Formicidae	Eukaryota	454	148	910	795	838	1324
Fortieaceae	Bacteria <prokaryotes>	52	46	80	147	34	98
Fragilariaceae	Eukaryota	5	0	20	6	6	55
Francisellaceae	Bacteria <prokaryotes>	7049	3709	4042	3156	8612	6921
Frankiaceae	Bacteria <prokaryotes>	1806	857	1963	3427	1367	2374
Fringillidae	Eukaryota	0	0	2	1	1	5
Fucaceae	Eukaryota	0	0	2	0	1	6
Funariaceae	Eukaryota	248	96	784	711	451	935
Fundulidae	Eukaryota	26	12	72	57	36	86
Fusobacteriaceae	Bacteria <prokaryotes>	2948	1914	3402	2102	2731	2718
Fusochloris	Eukaryota	0	0	0	1	0	0
Galagidae	Eukaryota	1	0	11	10	11	27
Galaxauraceae	Eukaryota	2	0	6	2	1	4
Gallaecimonas	Bacteria <prokaryotes>	230	51	332	346	727	770
Gallionellaceae	Bacteria <prokaryotes>	813	292	883	1338	1100	1373
Gammaridae	Eukaryota	0	0	0	0	0	0
Gasterosteidae	Eukaryota	3	2	1	0	1	1
Gastropod associated circular ssDNA virus	Viruses	0	0	2	0	0	0
Gavialidae	Eukaryota	5	0	12	13	8	21
Gaviidae	Eukaryota	0	0	0	0	0	3
Gekkonidae	Eukaryota	48	16	173	77	29	161
Gelidiaceae	Eukaryota	0	0	12	3	9	23
Geminella	Eukaryota	0	0	0	0	0	3
Geminicoccus	Bacteria <prokaryotes>	388	152	540	868	644	935
Geminigeraceae	Eukaryota	840	331	2507	1826	1275	3511
Gemmataceae	Bacteria <prokaryotes>	3910	2128	4975	6782	5193	5468
Gemmatimonadaceae	Bacteria <prokaryotes>	132	79	1439	3464	933	3587
Geobacillus virus E2	Viruses	102	19	7	12	5	0
Geobacteraceae	Bacteria <prokaryotes>	4547	3400	7745	10288	5693	12010
Geodermatophilaceae	Bacteria <prokaryotes>	1403	247	2160	3628	1851	3154
Geomicrobium	Bacteria <prokaryotes>	161	267	154	153	133	151
Geomitridae	Eukaryota	0	0	0	0	0	0
Geoplanidae	Eukaryota	0	0	0	0	1	2
Geotoga	Bacteria <prokaryotes>	561	96	328	295	450	308
Geraniaceae	Eukaryota	0	0	2	0	2	2
Gesneriaceae	Eukaryota	0	0	0	1	0	0
Gigartinaceae	Eukaryota	275	102	458	435	385	679
Gigasporaceae	Eukaryota	0	0	0	0	0	1
Ginkgoaceae	Eukaryota	0	0	0	0	0	0
Glaucocystaceae	Eukaryota	0	0	1	5	1	2
Gloeobacteraceae	Bacteria <prokaryotes>	860	911	1183	1414	582	1385
Gloeochaetaceae	Eukaryota	1	0	1	0	0	3
Gloeomargaritaceae	Bacteria <prokaryotes>	55	40	126	135	532	176
Gloeophyllaceae	Eukaryota	51	5	33	29	25	36
Gloeotilopsis	Eukaryota	0	0	0	2	0	1
Gloiosiphoniaceae	Eukaryota	0	0	0	0	0	1
Glomeraceae	Eukaryota	0	0	0	1	0	1
Glomerellaceae	Eukaryota	62	12	100	73	53	151
Glossiphoniidae	Eukaryota	244	28	230	175	97	297
Glossoscolecidae	Eukaryota	0	0	3	13	0	2
Glycomycetaceae	Bacteria <prokaryotes>	536	93	366	476	274	280
Gobiidae	Eukaryota	29	0	77	65	47	143
Gomontiellaceae	Bacteria <prokaryotes>	130	42	182	228	300	457
Gomphonemataceae	Eukaryota	6	0	8	23	8	48
Gongylonematidae	Eukaryota	0	0	1	0	0	0
Gordoniaceae	Bacteria <prokaryotes>	403	101	587	966	399	647
Gorgoniidae	Eukaryota	11	0	5	1	3	1
Gottschalkia	Bacteria <prokaryotes>	236	68	735	534	552	790
Gracilariaceae	Eukaryota	8	2	46	7	8	50
Granulosicoccaceae	Bacteria <prokaryotes>	355	36	744	1702	1703	2061
Gregarinidae	Eukaryota	62	51	115	40	47	164
Grimmiaceae	Eukaryota	0	0	1	0	0	2
Gruidae	Eukaryota	3	1	6	1	9	11
Gryllidae	Eukaryota	0	0	0	0	0	2
Gymnochlora	Eukaryota	0	0	0	0	0	1
Gymnodiniaceae	Eukaryota	0	0	0	0	1	0
Haemoproteidae	Eukaryota	2	0	3	0	0	4
Hafniaceae	Bacteria <prokaryotes>	285	178	280	236	210	211
Hahellaceae	Bacteria <prokaryotes>	10500	6530	12204	15852	20703	26154
Halanaerobiaceae	Bacteria <prokaryotes>	2701	739	3940	2717	2170	3103
Halcampoididae	Eukaryota	0	0	0	0	0	2
Haliclystidae	Eukaryota	0	0	1	1	0	0
Halictidae	Eukaryota	6	1	32	27	29	54
Halieaceae	Bacteria <prokaryotes>	6313	834	19604	37006	56331	72536
Haliscomenobacteraceae	Bacteria <prokaryotes>	509	231	1931	3256	3894	4898
Haloarculaceae	Archaea	1272	557	2286	1767	2818	1490
Halobacteriaceae	Archaea	1322	359	3573	2268	1944	2069
Halobacteriovoraceae	Bacteria <prokaryotes>	778	259	1344	2143	2286	1775
Halobacteroidaceae	Bacteria <prokaryotes>	5861	1566	6082	5401	3824	5165
Halococcaceae	Archaea	171	53	728	482	252	307
Haloferacaceae	Archaea	1438	652	3624	2677	1819	2515
Halomonadaceae	Bacteria <prokaryotes>	12462	5863	9281	20348	12896	15655
Haloplasmataceae	Bacteria <prokaryotes>	40	0	78	92	69	126
Halorubraceae	Archaea	1239	434	1879	2076	2030	1551
Halothiobacillaceae	Bacteria <prokaryotes>	197	25	382	688	662	906
Haloviruses	Viruses	85	52	129	39	48	14
Halymeniaceae	Eukaryota	0	0	2	2	1	6
Hapalosiphonaceae	Bacteria <prokaryotes>	836	303	1322	1438	1459	1579
Harpochytriaceae	Eukaryota	0	0	0	0	0	0
Harrimaniidae	Eukaryota	325	102	867	779	380	1089
Hartmannellidae	Eukaryota	0	0	0	4	0	3
Helicobacteraceae	Bacteria <prokaryotes>	5542	2457	3335	2103	4022	2672
Helicosporidium	Eukaryota	0	0	3	1	0	0
Heliobacteriaceae	Bacteria <prokaryotes>	138	60	185	209	121	221
Helioporidae	Eukaryota	2	0	0	0	0	0
Helotiaceae	Eukaryota	14	0	6	20	3	30
Hemiaulaceae	Eukaryota	3	0	6	16	2	43
Hemiselmidaceae	Eukaryota	26	1	40	16	15	46
Herpesviridae	Viruses	7	2	2	4	1	2
Herpetosiphonaceae	Bacteria <prokaryotes>	534	275	1447	1489	740	1397
Herpotrichiellaceae	Eukaryota	137	30	343	358	207	563
Hesperiidae	Eukaryota	0	0	0	1	0	1
Heterobranchia	Eukaryota	5	2	5	3	6	9
Heteromyidae	Eukaryota	0	0	9	21	2	13
Hexamitidae	Eukaryota	30	16	50	33	21	69
Hildenbrandiaceae	Eukaryota	0	1	1	1	2	13
Hipposideridae	Eukaryota	2	0	3	13	3	13
Histionidae	Eukaryota	3	3	37	29	15	82
Holophagaceae	Bacteria <prokaryotes>	1564	728	1237	923	586	855
Holosporaceae	Bacteria <prokaryotes>	308	30	387	462	652	706
Hominidae	Eukaryota	10	37	73	791	97	477
Homolidae	Eukaryota	0	0	5	0	0	20
Hormathiidae	Eukaryota	0	0	0	0	0	0
Hyalellidae	Eukaryota	235	43	428	482	334	861
Hyaloraphidium	Eukaryota	0	0	0	0	0	0
Hydractiniidae	Eukaryota	0	0	2	0	1	0
Hydridae	Eukaryota	152	22	742	442	364	1065
Hydrococcaceae	Bacteria <prokaryotes>	79	32	207	271	195	407
Hydrogenimonas	Bacteria <prokaryotes>	320	142	286	215	310	259
Hydrogenophilaceae	Bacteria <prokaryotes>	66	44	73	139	81	162
Hydrogenothermaceae	Bacteria <prokaryotes>	2795	1081	2645	1963	2347	2753
Hydrometridae	Eukaryota	0	0	2	0	0	5
Hydrophilidae	Eukaryota	0	0	1	0	0	0
Hyellaceae	Bacteria <prokaryotes>	2366	1783	1494	1073	844	1134
Hylobatidae	Eukaryota	3	5	16	258	37	141
Hymenobacteraceae	Bacteria <prokaryotes>	14572	18482	11932	8736	8589	13003
Hymenochaetaceae	Eukaryota	83	32	72	38	29	94
Hyphomicrobiaceae	Bacteria <prokaryotes>	12368	7264	12736	15259	15501	14834
Hyphomonadaceae	Bacteria <prokaryotes>	8279	4007	7700	11184	12734	15764
Hypocreaceae	Eukaryota	35	4	102	64	48	85
Hypogastruridae	Eukaryota	1	0	0	0	0	0
Hytrosaviridae	Viruses	0	0	1	1	0	0
Ibaliidae	Eukaryota	0	0	0	0	0	0
Ichthyophthirius	Eukaryota	274	44	1757	341	399	3190
Ictaluridae	Eukaryota	11	1	57	50	29	89
Idiomarinaceae	Bacteria <prokaryotes>	1167	413	2509	7812	4361	6208
Idiomarinaceae phage 1N2-2	Viruses	83	41	60	38	59	14
Ignatzschineria	Bacteria <prokaryotes>	183	58	254	251	572	756
Ignavibacteriaceae	Bacteria <prokaryotes>	2369	717	7729	11023	8322	16617
Immundisolibacteraceae	Bacteria <prokaryotes>	331	65	453	780	324	948
Indriidae	Eukaryota	1	0	4	27	3	29
Inoviridae	Viruses	0	0	0	0	0	0
Intestinimonas	Bacteria <prokaryotes>	118	51	88	86	28	49
Intrasporangiaceae	Bacteria <prokaryotes>	1322	413	1360	2183	1212	1525
Iridoviridae	Viruses	484	144	352	312	731	384
Isosphaeraceae	Bacteria <prokaryotes>	778	565	2769	5141	1958	4076
Isotomidae	Eukaryota	126	71	449	369	188	692
Ixodidae	Eukaryota	107	7	148	154	130	273
Jakobidae	Eukaryota	10	1	11	10	10	52
Jenufa	Eukaryota	0	0	0	0	0	0
Jiangellaceae	Bacteria <prokaryotes>	549	11	746	1368	457	671
Jonesiaceae	Bacteria <prokaryotes>	33	3	36	77	39	47
Juglandaceae	Eukaryota	43	6	89	84	32	155
Kallipyga	Bacteria <prokaryotes>	31	12	48	57	18	61
Kangiellaceae	Bacteria <prokaryotes>	907	133	2597	3793	5621	8258
Kaumoebavirus	Viruses	893	462	542	177	452	217
Kiloniellaceae	Bacteria <prokaryotes>	4352	1341	5758	10004	11156	10999
Kineosporiaceae	Bacteria <prokaryotes>	198	30	183	415	135	243
Kinetoplastibacterium	Bacteria <prokaryotes>	253	6	382	303	764	763
Kiritimatiellaceae	Bacteria <prokaryotes>	744	242	1155	2767	1270	2871
Klebsormidiaceae	Eukaryota	0	0	1	0	1	2
Kofleriaceae	Bacteria <prokaryotes>	1462	533	2013	3321	1672	3775
Koliellaceae	Eukaryota	0	0	0	0	2	0
Kordiimonadaceae	Bacteria <prokaryotes>	1226	242	1895	3593	4462	4602
Kosmotogaceae	Bacteria <prokaryotes>	437	136	720	635	419	729
Ktedonobacteraceae	Bacteria <prokaryotes>	600	270	2352	2203	495	1921
Labridae	Eukaryota	20	4	26	26	23	31
Lachnospiraceae	Bacteria <prokaryotes>	15568	9628	12189	7781	10668	8335
Lactobacillaceae	Bacteria <prokaryotes>	2574	1532	2927	2075	2286	2196
Lactobacillus prophage Lj771	Viruses	0	0	0	0	0	2
Lake Sarah-associated circular molecule 5	Viruses	0	0	0	0	0	0
Lake Sarah-associated circular virus-11	Viruses	0	0	0	0	0	0
Lake Sarah-associated circular virus-19	Viruses	0	0	0	0	1	0
Lake Sarah-associated circular virus-3	Viruses	0	0	0	0	0	0
Lake Sarah-associated circular virus-42	Viruses	0	0	0	0	0	1
Lamiaceae	Eukaryota	0	0	0	0	0	0
Laminariaceae	Eukaryota	0	0	0	1	0	6
Lasiosphaeriaceae	Eukaryota	3	0	24	25	7	51
Lavidaviridae	Viruses	90	31	25	7	3	0
Lawsonella	Bacteria <prokaryotes>	15	4	100	253	143	239
Legionellaceae	Bacteria <prokaryotes>	6310	1998	7950	9715	13696	15452
Lentibulariaceae	Eukaryota	1	0	1	2	5	0
Lentimicrobiaceae	Bacteria <prokaryotes>	485	280	2424	3377	3935	5815
Lentisphaeraceae	Bacteria <prokaryotes>	905	365	1191	2218	1781	3932
Lepadidae	Eukaryota	0	0	0	2	0	0
Lepisosteidae	Eukaryota	13	0	60	52	50	107
Leporidae	Eukaryota	0	0	8	9	5	9
Leptocylindraceae	Eukaryota	0	0	8	0	0	34
Leptolyngbyaceae	Bacteria <prokaryotes>	8049	7005	6278	5899	6244	6448
Leptopilina boulardi filamentous virus	Viruses	0	0	0	0	0	1
Leptosomidae	Eukaryota	7	3	0	1	0	2
Leptosphaeriaceae	Eukaryota	47	14	23	27	13	45
Leptospiraceae	Bacteria <prokaryotes>	11570	7671	11468	12421	10871	14399
Leptotrichiaceae	Bacteria <prokaryotes>	1302	381	1513	1040	1329	1460
Leucocytozoidae	Eukaryota	0	0	8	5	2	12
Leuconostocaceae	Bacteria <prokaryotes>	509	182	275	248	254	239
Leucopsacidae	Eukaryota	0	0	0	0	0	0
Levyella	Bacteria <prokaryotes>	0	1	10	11	24	8
Lewinellaceae	Bacteria <prokaryotes>	739	319	2208	4081	3110	5278
Liagoraceae	Eukaryota	4	1	15	11	19	15
Limnephilidae	Eukaryota	0	0	0	0	1	0
Limnochordaceae	Bacteria <prokaryotes>	285	25	564	927	172	813
Limulidae	Eukaryota	174	335	770	282	193	558
Lingulidae	Eukaryota	259	69	591	598	418	1056
Lipotidae	Eukaryota	27	7	20	46	48	122
Listeriaceae	Bacteria <prokaryotes>	507	173	553	531	498	485
Lithodesmiaceae	Eukaryota	0	0	4	4	5	18
Littorinidae	Eukaryota	0	0	0	0	2	0
Liviidae	Eukaryota	44	15	192	156	100	566
Loktanella phage pCB2051-A	Viruses	1	1	2	6	3	5
Lotharella	Eukaryota	0	0	1	1	1	0
Lottiidae	Eukaryota	88	33	413	300	237	715
Macroscelididae	Eukaryota	91	14	28	34	21	44
Magnaporthaceae	Eukaryota	52	6	72	137	577	535
Magnetococcaceae	Bacteria <prokaryotes>	3042	2256	2958	2535	1758	1959
Malacoherpesviridae	Viruses	0	0	0	0	0	0
Malasseziaceae	Eukaryota	57	4	94	73	51	122
Malawimonadidae	Eukaryota	0	0	4	4	8	11
Mallomonadaceae	Eukaryota	2	0	9	6	11	58
Malvaceae	Eukaryota	136	20	310	268	221	444
Mamiellaceae	Eukaryota	2309	1130	3020	1776	1420	2993
Mandibulata	Eukaryota	2	0	16	15	12	39
Manidae	Eukaryota	7	0	9	16	8	35
Marasmiaceae	Eukaryota	12	3	52	28	41	73
Marattiaceae	Eukaryota	0	0	0	1	0	0
Marchantiaceae	Eukaryota	0	0	0	0	1	0
Marine Group I	Archaea	2127	444	15882	9814	107689	40853
Marinifilaceae	Bacteria <prokaryotes>	149	49	1040	1681	2159	2995
Marinilabiliaceae	Bacteria <prokaryotes>	1827	920	3765	4150	5904	8057
Marinitoga	Bacteria <prokaryotes>	1235	600	1277	1022	1175	1310
Marinomonas phage P12026	Viruses	26	29	21	250	102	59
Mariprofundaceae	Bacteria <prokaryotes>	384	124	516	723	484	850
Marseilleviridae	Viruses	365	348	1073	155	346	373
McMurdo Ice Shelf pond-associated circular DNA virus-8	Viruses	0	0	0	0	0	0
Megachilidae	Eukaryota	37	2	30	13	20	53
Megophryidae	Eukaryota	0	0	1	0	0	0
Melampsoraceae	Eukaryota	63	1	41	28	34	61
Melioribacteraceae	Bacteria <prokaryotes>	1555	350	6859	10483	8399	15225
Merismopediaceae	Bacteria <prokaryotes>	212	152	307	213	249	232
Meropidae	Eukaryota	0	0	4	5	2	5
Meruliaceae	Eukaryota	0	0	1	0	0	0
Merulinidae	Eukaryota	273	64	610	752	330	994
Mesitornithidae	Eukaryota	0	0	7	5	6	26
Mesoaciditogaceae	Bacteria <prokaryotes>	228	26	162	237	152	135
Mesostigmataceae	Eukaryota	0	0	1	4	2	5
Mesotaeniaceae	Eukaryota	0	0	0	3	1	3
Methanobacteriaceae	Archaea	1912	631	3626	4286	4480	4109
Methanocaldococcaceae	Archaea	563	287	1385	1446	1619	1417
Methanocellaceae	Archaea	417	244	1278	1879	1573	1749
Methanococcaceae	Archaea	1480	723	1313	1265	1381	1080
Methanocorpusculaceae	Archaea	59	28	159	238	399	159
Methanomassiliicoccaceae	Archaea	1141	620	7968	15122	10947	11627
Methanomicrobiaceae	Archaea	1207	433	1873	2226	2001	2036
Methanonatronarchaeum	Archaea	546	190	429	629	719	471
Methanopyraceae	Archaea	65	47	143	237	222	191
Methanoregulaceae	Archaea	753	260	1148	1241	919	992
Methanosaetaceae	Archaea	80	35	759	1233	932	1162
Methanosarcinaceae	Archaea	2841	950	6604	8575	7908	8091
Methanospirillaceae	Archaea	21	5	121	154	197	141
Methanothermaceae	Archaea	82	18	213	288	328	310
Methermicoccaceae	Archaea	25	12	341	554	362	428
Methylacidiphilaceae	Bacteria <prokaryotes>	181	48	514	556	537	741
Methylobacteriaceae	Bacteria <prokaryotes>	7093	4806	5417	5913	6942	4561
Methylobrevis	Bacteria <prokaryotes>	21	3	58	115	99	170
Methyloceanibacter	Bacteria <prokaryotes>	923	423	895	1634	1140	1377
Methylococcaceae	Bacteria <prokaryotes>	7792	3616	9769	13722	12206	17232
Methylocystaceae	Bacteria <prokaryotes>	4934	1634	4744	7218	8713	7393
Methyloligella	Bacteria <prokaryotes>	463	48	422	801	916	683
Methylophilaceae	Bacteria <prokaryotes>	2604	1522	3046	3407	3684	4499
Methylothermaceae	Bacteria <prokaryotes>	196	49	220	456	386	548
Metschnikowiaceae	Eukaryota	211	18	191	224	250	293
Micavibrio	Bacteria <prokaryotes>	3717	3280	3303	3115	2946	2020
Microascaceae	Eukaryota	13	4	20	8	12	22
Microbacteriaceae	Bacteria <prokaryotes>	3540	1547	3662	4398	4137	3590
Microbotryaceae	Eukaryota	0	0	0	0	0	0
Microbulbiferaceae	Bacteria <prokaryotes>	2537	1079	5268	8585	10960	18236
Micrococcaceae	Bacteria <prokaryotes>	2115	811	2761	3165	1725	1969
Microcoleaceae	Bacteria <prokaryotes>	6200	3357	5470	4586	5965	5819
Microcystaceae	Bacteria <prokaryotes>	1754	886	1147	810	1030	813
Microhylidae	Eukaryota	0	0	0	0	0	0
Micromonas pusilla virus 12T	Viruses	1644	700	1046	750	1618	662
Micromonosporaceae	Bacteria <prokaryotes>	5737	2933	4834	5282	3261	3359
Microscillaceae	Bacteria <prokaryotes>	815	398	1816	2144	2744	3425
Microsporaceae	Eukaryota	0	0	1	4	0	9
Microthrixaceae	Bacteria <prokaryotes>	2268	132	2340	8392	1133	3578
Microviridae	Viruses	0	0	5	0	0	0
Mimiviridae	Viruses	10969	3936	8656	3197	4987	6669
Miraciidae	Eukaryota	0	0	0	2	0	0
Mitosporidium	Eukaryota	30	6	55	25	34	84
Mixiaceae	Eukaryota	84	19	102	54	177	89
Mollivirus sibericum	Viruses	2	2	4	0	1	3
Mongoliimonas	Bacteria <prokaryotes>	177	29	99	292	176	226
Monodopsidaceae	Eukaryota	56	13	396	317	190	641
Monomastigaceae	Eukaryota	0	0	1	0	1	3
Moraceae	Eukaryota	64	36	108	81	87	158
Moraxellaceae	Bacteria <prokaryotes>	9213	5344	9490	13277	16823	13933
Morganellaceae	Bacteria <prokaryotes>	4416	3067	2983	2791	2567	2916
Moritellaceae	Bacteria <prokaryotes>	269	127	418	903	768	717
Mortierellaceae	Eukaryota	126	26	306	213	141	390
Muribaculaceae	Bacteria <prokaryotes>	32	22	65	73	61	131
Muridae	Eukaryota	38	10	82	42	24	66
Musaceae	Eukaryota	88	24	168	117	77	173
Muscicapidae	Eukaryota	2	0	15	19	1	20
Muscidae	Eukaryota	114	10	118	61	68	155
Musophagidae	Eukaryota	0	0	9	2	2	18
Mustelidae	Eukaryota	1	0	8	16	2	31
Mychonastaceae	Eukaryota	0	0	0	0	0	2
Mycobacteriaceae	Bacteria <prokaryotes>	6957	3487	7568	9050	4970	6625
Mycoplasmataceae	Bacteria <prokaryotes>	1135	368	1311	674	974	905
Mycosphaerellaceae	Eukaryota	56	4	122	116	48	179
Myoviridae	Viruses	2290017	1931586	1122346	318436	1800018	177872
Myrmeleontidae	Eukaryota	0	0	0	0	0	1
Myrtaceae	Eukaryota	24	19	85	43	40	103
Mytilidae	Eukaryota	0	0	0	1	0	0
Myxococcaceae	Bacteria <prokaryotes>	1997	1178	2204	3988	2158	3707
Nakamurellaceae	Bacteria <prokaryotes>	212	55	166	276	120	190
Nannocystaceae	Bacteria <prokaryotes>	349	59	1762	3279	1752	3931
Natranaerobiaceae	Bacteria <prokaryotes>	193	29	575	582	431	772
Natrialbaceae	Archaea	1357	583	3146	2740	2439	2467
Nautiliaceae	Bacteria <prokaryotes>	537	140	631	339	720	650
Naviculaceae	Eukaryota	4	0	17	17	15	70
Ndongobacter	Bacteria <prokaryotes>	5	5	9	6	3	2
Nectriaceae	Eukaryota	44	9	118	98	61	90
Neiella	Bacteria <prokaryotes>	217	17	265	446	831	631
Neisseriaceae	Bacteria <prokaryotes>	4637	2592	2522	2209	3227	2992
Nelumbonaceae	Eukaryota	42	6	66	55	49	96
Nematocida	Eukaryota	181	65	92	38	42	27
Nemouridae	Eukaryota	0	0	0	0	0	0
Neochloridaceae	Eukaryota	0	0	0	0	0	0
Neocystis	Eukaryota	0	0	1	0	0	0
Neodangemannia	Eukaryota	0	0	0	0	1	2
Neofamilia	Bacteria <prokaryotes>	41	11	52	34	37	47
Neotrigoniidae	Eukaryota	0	0	0	0	0	1
Nephroselmis	Eukaryota	1	0	7	10	5	16
Neritidae	Eukaryota	0	0	1	0	0	0
Niphatidae	Eukaryota	273	62	780	803	517	1289
Nitidulidae	Eukaryota	46	27	67	49	40	115
Nitratifractor	Bacteria <prokaryotes>	206	181	287	109	108	125
Nitratiruptor	Bacteria <prokaryotes>	152	59	187	253	242	263
Nitriliruptoraceae	Bacteria <prokaryotes>	2182	41	1195	3259	940	1043
Nitrosomonadaceae	Bacteria <prokaryotes>	4639	3826	5036	6610	6219	6638
Nitrosopumilaceae	Archaea	1719	408	11545	7513	41349	17596
Nitrososphaeraceae	Archaea	80	42	918	756	2035	888
Nitrospinaceae	Bacteria <prokaryotes>	1645	416	4366	8286	3796	11277
Nitrospiraceae	Bacteria <prokaryotes>	9630	7701	10601	10791	8979	11332
Nitrospirae bacterium HCH-1	Bacteria <prokaryotes>	838	842	942	776	467	685
Nocardiaceae	Bacteria <prokaryotes>	2894	1045	3788	6046	2585	4385
Nocardioidaceae	Bacteria <prokaryotes>	2821	453	3616	6351	2135	3981
Nocardiopsaceae	Bacteria <prokaryotes>	1365	452	1031	1635	929	1081
Noctuidae	Eukaryota	50	3	82	57	34	153
Noelaerhabdaceae	Eukaryota	1100	237	18165	10333	4974	26660
Nosematidae	Eukaryota	234	47	144	59	78	76
Nostocaceae	Bacteria <prokaryotes>	3619	2283	3510	3149	3510	3395
Nothobranchiidae	Eukaryota	7	2	73	83	24	145
Notoacmeibacteraceae	Bacteria <prokaryotes>	574	182	316	264	402	205
Nototheniidae	Eukaryota	21	2	55	65	25	87
Nucleariidae	Eukaryota	0	0	0	2	0	0
Nudiviridae	Viruses	2	0	0	0	0	0
Numididae	Eukaryota	0	0	14	13	3	27
OM43 clade	Bacteria <prokaryotes>	1311	262	1127	1286	2163	2702
Oceaniidae	Eukaryota	1	0	0	1	1	1
Oceanospirillaceae	Bacteria <prokaryotes>	14728	7714	21770	39142	38669	55104
Ochotonidae	Eukaryota	3	0	13	10	5	18
Octodontidae	Eukaryota	3	0	9	15	5	12
Octopodidae	Eukaryota	97	15	174	156	143	310
Odobenidae	Eukaryota	1	0	11	6	3	4
Odoribacteraceae	Bacteria <prokaryotes>	301	164	683	719	1094	1216
Oedocladium	Eukaryota	0	0	0	0	0	0
Oedogonium	Eukaryota	6	0	1	0	0	0
Oleiphilaceae	Bacteria <prokaryotes>	1249	243	3482	6604	8103	11071
Olindiasidae	Eukaryota	0	0	1	3	1	2
Olindiidae	Eukaryota	0	0	2	0	0	2
Oltmannsiellopsis	Eukaryota	0	0	1	0	1	1
Onchocercidae	Eukaryota	68	2	135	66	56	176
Onygenaceae	Eukaryota	6	1	5	5	6	25
Ophiocordycipitaceae	Eukaryota	13	1	32	29	27	37
Ophiostomataceae	Eukaryota	29	0	42	14	17	53
Opisthocomidae	Eukaryota	4	0	9	6	2	12
Opisthorchiidae	Eukaryota	17	1	111	68	43	200
Opitutaceae	Bacteria <prokaryotes>	3070	1237	3526	6159	4987	9795
Orbaceae	Bacteria <prokaryotes>	829	483	1106	1664	1983	2156
Orbiliaceae	Eukaryota	32	0	88	78	63	106
Orchidaceae	Eukaryota	65	13	312	182	116	326
Ordosporidae	Eukaryota	82	36	98	43	20	32
Ornithorhynchidae	Eukaryota	1	0	43	27	17	51
Orthotrichaceae	Eukaryota	0	0	0	0	0	3
Orussidae	Eukaryota	73	16	135	44	35	66
Orycteropodidae	Eukaryota	7	0	20	15	8	34
Oscillatoriaceae	Bacteria <prokaryotes>	2552	1111	3852	4605	3313	4783
Oscillochloridaceae	Bacteria <prokaryotes>	126	7	692	710	168	472
Oscillospiraceae	Bacteria <prokaryotes>	149	102	220	254	232	195
Osteoglossidae	Eukaryota	28	5	84	101	57	115
Osteoglossocephalai	Eukaryota	30	4	93	66	121	152
Ostreidae	Eukaryota	205	25	699	499	391	883
Ostreobiaceae	Eukaryota	0	0	0	0	0	0
Ostreococcus lucimarinus virus OlV5	Viruses	119	46	85	36	80	60
Otididae	Eukaryota	2	1	3	1	3	7
Oxalobacteraceae	Bacteria <prokaryotes>	9290	6768	8813	12425	10246	8678
Pacmanvirus A23	Viruses	63	26	129	85	182	167
Paenibacillaceae	Bacteria <prokaryotes>	13801	8997	19379	20347	13877	18581
Palmariaceae	Eukaryota	0	0	2	1	0	8
Palmophyllum	Eukaryota	0	0	0	2	0	3
Palpitomonas	Eukaryota	1	0	2	2	4	9
Paludibacteraceae	Bacteria <prokaryotes>	206	111	518	523	811	1047
Pandoravirus dulcis	Viruses	0	0	9	9	3	5
Pandoravirus inopinatum	Viruses	3	1	24	19	3	27
Pandoravirus salinus	Viruses	2	1	7	12	4	11
Papilionidae	Eukaryota	174	77	452	290	194	473
Parachlamydiaceae	Bacteria <prokaryotes>	4479	3149	3111	1691	2415	1584
Paracoccidioides	Eukaryota	13	3	18	12	10	14
Paralichthyidae	Eukaryota	58	36	35	28	5	48
Parameciidae	Eukaryota	276	40	2795	556	486	5290
Paramoebidae	Eukaryota	0	0	0	0	0	1
Parazoanthidae	Eukaryota	0	0	0	0	0	1
Paridae	Eukaryota	7	1	35	16	8	26
Partenskyella	Eukaryota	0	0	0	0	0	0
Parvularculaceae	Bacteria <prokaryotes>	716	169	736	1318	1490	1790
Passerellidae	Eukaryota	0	0	6	3	4	5
Pasteurellaceae	Bacteria <prokaryotes>	4413	1934	4176	3797	5657	5909
Patulibacteraceae	Bacteria <prokaryotes>	115	13	234	430	155	298
Paulinellidae	Eukaryota	34	35	161	97	128	215
Pavlovaceae	Eukaryota	5	1	6	2	1	14
Pectinidae	Eukaryota	193	84	543	496	287	875
Pectobacteriaceae	Bacteria <prokaryotes>	730	886	739	874	1180	640
Pedaliaceae	Eukaryota	26	17	69	35	22	60
Pediculidae	Eukaryota	80	13	187	174	126	344
Pedinomonadaceae	Eukaryota	0	0	0	7	2	0
Pelagibacteraceae	Bacteria <prokaryotes>	1825412	48871	928224	1313766	939483	749906
Pelagiidae	Eukaryota	0	0	2	0	0	0
Pelecanidae	Eukaryota	1	0	1	1	1	3
Penaeidae	Eukaryota	0	0	0	0	0	1
Pentatomidae	Eukaryota	98	40	171	165	74	223
Peptococcaceae	Bacteria <prokaryotes>	3914	1665	10868	9877	4884	9667
Peptoniphilaceae	Bacteria <prokaryotes>	2886	1265	3450	2000	2558	2825
Peptostreptococcaceae	Bacteria <prokaryotes>	4244	1334	6028	4114	4571	4922
Peridiniaceae	Eukaryota	2	0	23	17	4	73
Perkinsidae	Eukaryota	388	84	2071	959	468	3433
Peronosporaceae	Eukaryota	0	0	0	0	0	9
Persicobacteraceae	Bacteria <prokaryotes>	422	257	560	645	1188	1146
Petrosiidae	Eukaryota	0	0	0	0	0	2
Petrotoga	Bacteria <prokaryotes>	100	7	159	191	212	328
Phacotaceae	Eukaryota	0	0	1	0	0	0
Phaeocystaceae	Eukaryota	145	31	1411	154	180	2443
Phaeocystis globosa virus virophage	Viruses	21	7	15	11	14	5
Phaeodactylaceae	Eukaryota	234	171	1390	1116	735	2207
Phaeosphaeriaceae	Eukaryota	33	18	44	74	53	118
Phaethontidae	Eukaryota	0	0	1	0	1	3
Phaffomycetaceae	Eukaryota	189	17	206	116	105	188
Phage Gifsy-2	Viruses	0	0	0	1	1	1
Phakopsoraceae	Eukaryota	0	0	0	0	0	2
Phalacrocoracidae	Eukaryota	0	0	3	3	2	5
Phanerochaetaceae	Eukaryota	13	3	36	28	13	44
Pharyngomonas	Eukaryota	0	0	0	0	0	1
Phascolarctidae	Eukaryota	18	4	31	35	36	70
Phasianidae	Eukaryota	12	6	68	67	37	65
Phialocephala <Helotiales>	Eukaryota	11	1	56	35	35	51
Phocaeicola	Bacteria <prokaryotes>	63	27	57	79	30	54
Phocidae	Eukaryota	1	0	9	14	5	8
Phormidium phage MIS-PhV1B	Viruses	2	4	10	2	4	11
Phrymaceae	Eukaryota	96	23	167	143	75	262
Phycisphaeraceae	Bacteria <prokaryotes>	238	133	546	1154	537	1084
Phycisphaerae bacterium L21-RPul-D3	Bacteria <prokaryotes>	235	125	245	424	223	496
Phycisphaerae bacterium SM-PulAB-D3	Bacteria <prokaryotes>	172	106	164	257	205	299
Phycisphaerae bacterium ST-PulAB-D4	Bacteria <prokaryotes>	25	8	87	239	146	324
Phycodnaviridae	Viruses	36623	9356	40846	20555	25963	39821
Phycomycetaceae	Eukaryota	76	6	221	142	88	289
Phyllobacteriaceae	Bacteria <prokaryotes>	13667	9268	13041	18807	16485	15726
Phyllophoraceae	Eukaryota	13	22	8	3	0	5
Physeteridae	Eukaryota	2	0	14	26	4	30
Phytophthora	Eukaryota	1205	422	3399	2015	2069	3996
Phytoseiidae	Eukaryota	36	2	187	176	112	333
Pichiaceae	Eukaryota	75	2	156	119	138	236
Picidae	Eukaryota	8	1	20	15	7	39
Picocystis	Eukaryota	0	0	1	1	1	4
Picrophilaceae	Archaea	140	76	254	328	256	332
Pieridae	Eukaryota	2	22	41	40	33	84
Pinaceae	Eukaryota	3	1	22	5	46	27
Pipidae	Eukaryota	136	38	250	183	108	286
Pipridae	Eukaryota	5	0	18	35	16	27
Piscirickettsiaceae	Bacteria <prokaryotes>	5363	1883	7566	19575	11683	15820
Pithoviridae	Viruses	311	213	289	167	134	243
Placobranchidae	Eukaryota	0	0	0	0	1	0
Plakinidae	Eukaryota	0	0	1	0	0	2
Planctomycetaceae	Bacteria <prokaryotes>	12662	7105	22611	40693	22911	39052
Planctonema	Eukaryota	4	0	1	4	1	0
Planococcaceae	Bacteria <prokaryotes>	1368	428	2509	2442	1850	2793
Planorbidae	Eukaryota	139	30	365	166	173	419
Plasmodiidae	Eukaryota	346	76	652	298	365	958
Plasmodiophoridae	Eukaryota	0	0	0	2	1	10
Plectosphaerellaceae	Eukaryota	11	0	13	10	11	42
Pleistophoridae	Eukaryota	22	0	26	13	10	23
Pleosporaceae	Eukaryota	88	11	194	163	132	216
Plesiomonas	Bacteria <prokaryotes>	52	16	64	88	129	159
Pleurobrachiidae	Eukaryota	0	0	1	1	0	0
Pleurotaceae	Eukaryota	0	0	0	0	0	1
Pleuroziaceae	Eukaryota	0	0	0	0	0	1
Plexauridae	Eukaryota	4	0	3	0	6	2
Plocamiaceae	Eukaryota	3	2	2	0	1	0
Plutellidae	Eukaryota	129	74	231	308	120	376
Pneumocystidaceae	Eukaryota	63	8	120	70	72	153
Poaceae	Eukaryota	417	81	915	772	664	1301
Podocarpaceae	Eukaryota	0	0	0	0	0	0
Podoviridae	Viruses	415448	438453	202474	78346	128536	23272
Poeciliidae	Eukaryota	13	9	111	125	75	179
Polyangiaceae	Bacteria <prokaryotes>	55982	217544	45059	125521	68355	49824
Polydnaviridae	Viruses	0	0	0	2	1	1
Polymorphum	Bacteria <prokaryotes>	226	85	177	259	193	307
Polyporaceae	Eukaryota	71	9	98	43	44	84
Polysphondylium	Eukaryota	147	80	496	310	190	494
Pomacentridae	Eukaryota	39	6	96	118	47	166
Porphyridiaceae	Eukaryota	15	0	39	24	24	50
Porphyromonadaceae	Bacteria <prokaryotes>	2060	1068	1937	1893	2250	2868
Porticoccaceae	Bacteria <prokaryotes>	751	123	2389	5948	6464	13362
Pottiaceae	Eukaryota	0	0	0	0	0	0
Potyviridae	Viruses	0	0	0	1	0	0
Poxviridae	Viruses	110	21	90	36	48	81
Prasinoderma	Eukaryota	0	0	2	0	1	0
Prevotellaceae	Bacteria <prokaryotes>	2020	1519	2511	1859	2393	2766
Priapulidae	Eukaryota	81	5	400	359	164	576
Procellariidae	Eukaryota	1	0	2	3	1	2
Prochloraceae	Bacteria <prokaryotes>	99306	35708	2054319	339095	2771195	1755530
Prochlorococcus phage P-GSP1	Viruses	14021	11206	8357	2690	24834	780
Prochlorococcus phage P-SSP3	Viruses	6111	3841	2741	780	2860	301
Prolixibacteraceae	Bacteria <prokaryotes>	1762	927	4582	6321	7395	10789
Promicromonosporaceae	Bacteria <prokaryotes>	358	76	292	467	380	239
Propionibacteriaceae	Bacteria <prokaryotes>	760	356	1071	1290	673	960
Prosorrhyncha	Eukaryota	0	0	0	0	0	3
Proteiniborus	Bacteria <prokaryotes>	317	85	617	501	317	752
Proteinivoraceae	Bacteria <prokaryotes>	219	19	566	474	409	745
Proteromonadidae	Eukaryota	0	0	0	0	0	3
Psathyrellaceae	Eukaryota	67	14	277	65	54	112
Pseudanabaenaceae	Bacteria <prokaryotes>	2328	1332	1681	1348	1467	1743
Pseudendoclonium	Eukaryota	0	0	2	0	0	7
Pseudeurotiaceae	Eukaryota	49	1	60	40	29	68
Pseudoalteromonadaceae	Bacteria <prokaryotes>	7672	5162	12022	32744	19073	17634
Pseudoalteromonas phage BS5	Viruses	0	5	4	8	9	5
Pseudoalteromonas phage PH1	Viruses	9	13	17	7	18	1
Pseudochloris	Eukaryota	0	0	0	0	0	0
Pseudoflavonifractor	Bacteria <prokaryotes>	113	45	137	124	49	93
Pseudohongiella	Bacteria <prokaryotes>	1779	735	5523	18269	11433	23361
Pseudomonadaceae	Bacteria <prokaryotes>	19893	13925	24702	59182	43692	45798
Pseudomonas phage O4	Viruses	1550	1046	176	151	71	35
Pseudomonas phage PA11	Viruses	239	430	135	58	101	17
Pseudomonas phage phiPto-bp6g	Viruses	15	11	6	1	0	1
Pseudomonas phage vB_PaeM_MAG1	Viruses	0	0	2	2	0	0
Pseudomonas phage vB_PaeP_Tr60_Ab31	Viruses	0	1	0	2	2	0
Pseudomuriellaceae	Eukaryota	0	0	0	0	0	2
Pseudoneochloris	Eukaryota	1	0	1	0	1	1
Pseudonocardiaceae	Bacteria <prokaryotes>	6611	1718	8237	11838	4975	7827
Pseudorhodoplanes	Bacteria <prokaryotes>	522	115	558	948	866	1058
Psittacidae	Eukaryota	2	0	10	4	2	6
Psittaculidae	Eukaryota	0	0	1	4	0	6
Psychromonadaceae	Bacteria <prokaryotes>	839	375	1017	2029	1560	2100
Pterocladiaceae	Eukaryota	0	0	1	3	0	2
Pteroclidae	Eukaryota	1	0	5	3	1	2
Pteromalidae	Eukaryota	17	3	157	74	69	129
Pteropodidae	Eukaryota	18	0	45	32	6	52
Pucciniaceae	Eukaryota	20	25	37	30	13	47
Punctulariaceae	Eukaryota	15	0	49	34	12	79
Puniceicoccaceae	Bacteria <prokaryotes>	206	112	1746	7060	6806	33069
Pycnococcaceae	Eukaryota	0	0	5	1	0	0
Pyralidae	Eukaryota	15	8	162	111	36	314
Pyramimonas	Eukaryota	0	1	2	2	5	8
Pyrenomonadaceae	Eukaryota	3	0	36	4	5	49
Pyrinomonas	Bacteria <prokaryotes>	257	75	1611	3170	1609	3120
Pyrodictiaceae	Archaea	189	32	282	364	263	299
Pyroglyphidae	Eukaryota	0	0	0	0	0	0
Pythiaceae	Eukaryota	0	0	2	1	0	10
Pythonidae	Eukaryota	5	0	25	32	23	33
Ralstonia phage RS138	Viruses	8	11	2	3	4	2
Reduviidae	Eukaryota	0	0	0	0	0	0
Renillidae	Eukaryota	0	0	1	0	0	1
Reoviridae	Viruses	1	2	3	2	3	0
Retroviridae	Viruses	0	0	2	2	0	1
Reyranella	Bacteria <prokaryotes>	498	181	998	1445	919	1900
Rhabditidae	Eukaryota	95	17	381	256	184	465
Rhamnaceae	Eukaryota	32	19	133	94	76	159
Rhincodontidae	Eukaryota	78	12	121	83	658	155
Rhinocerotidae	Eukaryota	2	1	9	9	1	12
Rhinolophidae	Eukaryota	11	0	25	12	11	22
Rhizobiaceae	Bacteria <prokaryotes>	30627	20867	23705	23072	27318	19110
Rhizobium phage RHEph10	Viruses	787	359	237	80	119	12
Rhizosoleniaceae	Eukaryota	5	0	26	19	15	100
Rhizostomatidae	Eukaryota	0	0	0	0	1	0
Rhodanobacteraceae	Bacteria <prokaryotes>	5349	4906	4580	4736	3894	4874
Rhodobacter phage RcapNL	Viruses	0	0	0	4	0	0
Rhodobacteraceae	Bacteria <prokaryotes>	57596	32117	73569	163132	162950	118423
Rhodobiaceae	Bacteria <prokaryotes>	11478	1198	8298	19601	12950	22930
Rhodochaetaceae	Eukaryota	1	0	2	0	2	7
Rhodocyclaceae	Bacteria <prokaryotes>	319	328	529	818	613	967
Rhodomelaceae	Eukaryota	18	12	38	33	35	81
Rhodospirillaceae	Bacteria <prokaryotes>	50921	24880	54588	89895	81685	85873
Rhodothermaceae	Bacteria <prokaryotes>	2171	966	7049	13507	6377	15956
Rhodymeniaceae	Eukaryota	5	0	3	3	0	5
Rickettsiaceae	Bacteria <prokaryotes>	3063	1269	2511	2355	3933	3223
Rikenellaceae	Bacteria <prokaryotes>	1619	1260	1628	1680	1643	2287
Rivulariaceae	Bacteria <prokaryotes>	1232	407	1594	1709	2021	2195
Rivulidae	Eukaryota	38	13	108	90	81	157
Rosaceae	Eukaryota	178	50	571	341	570	905
Roseiflexaceae	Bacteria <prokaryotes>	293	109	2237	2964	528	2282
Rossellidae	Eukaryota	0	0	0	2	0	1
Ruaniaceae	Bacteria <prokaryotes>	43	5	336	323	61	265
Rubricoccaceae	Bacteria <prokaryotes>	339	207	1671	2940	1446	3418
Rubritaleaceae	Bacteria <prokaryotes>	210	77	611	1976	1491	1169
Rubrobacteraceae	Bacteria <prokaryotes>	616	116	1761	2389	859	1901
Ruminococcaceae	Bacteria <prokaryotes>	6712	4049	6906	5507	4568	5491
Rutaceae	Eukaryota	229	39	283	233	174	378
SAR116 cluster	Bacteria <prokaryotes>	15163	6993	37903	45415	105947	61098
SAR92 clade	Bacteria <prokaryotes>	1226	117	2663	6355	7442	14855
Saccharomycetaceae	Eukaryota	400	14	482	443	332	647
Saccharospirillaceae	Bacteria <prokaryotes>	517	92	1219	2114	2538	3498
Saccotheciaceae	Eukaryota	45	17	148	251	76	240
Sagittidae	Eukaryota	0	0	1	0	0	0
Sagittiferidae	Eukaryota	0	0	0	0	0	0
Saitoella	Eukaryota	21	2	129	129	28	128
Salicaceae	Eukaryota	186	108	282	202	139	283
Salicola phage CGphi29	Viruses	30	38	18	34	44	9
Salinisphaeraceae	Bacteria <prokaryotes>	12686	11598	10809	17547	8917	5075
Salinivirgaceae	Bacteria <prokaryotes>	537	109	1159	1564	1981	2804
Salisaeta icosahedral phage 1	Viruses	6	2	9	8	7	5
Salmonella phage 64795_sal3	Viruses	0	1	1	7	3	2
Salmonella phage Fels-1	Viruses	8	2	4	1	1	0
Salmonidae	Eukaryota	31	8	131	109	79	206
Salpingoecidae	Eukaryota	2948	637	2981	2110	5468	3022
Sandaracinaceae	Bacteria <prokaryotes>	629	137	1457	2897	1242	3108
Sanguibacteraceae	Bacteria <prokaryotes>	58	5	61	91	39	53
Saprolegniaceae	Eukaryota	2261	853	4968	3142	2054	5655
Saprospiraceae	Bacteria <prokaryotes>	3938	2181	3931	3484	3963	4787
Sarcocystidae	Eukaryota	166	1	681	257	145	1017
Sargassaceae	Eukaryota	2	0	0	2	2	16
Schistosomatidae	Eukaryota	84	20	124	62	66	214
Schizomeridaceae	Eukaryota	0	0	0	0	2	0
Schizophyllaceae	Eukaryota	24	5	27	31	14	51
Schizosaccharomycetaceae	Eukaryota	179	26	221	116	108	234
Schizymeniaceae	Eukaryota	2	0	2	2	0	3
Schleiferiaceae	Bacteria <prokaryotes>	149	43	783	1065	1244	2304
Sciadopityaceae	Eukaryota	0	0	0	0	1	2
Sciaenidae	Eukaryota	14	1	52	71	16	80
Scinaiaceae	Eukaryota	0	0	0	0	2	2
Sciuridae	Eukaryota	3	0	27	19	19	79
Sclerotiniaceae	Eukaryota	6	0	36	37	19	75
Scolopacidae	Eukaryota	20	0	15	19	42	21
Scytonemataceae	Bacteria <prokaryotes>	288	126	680	789	519	794
Scytosiphonaceae	Eukaryota	0	0	0	0	0	2
Sebdeniaceae	Eukaryota	3	2	2	0	0	0
Seculamonas	Eukaryota	1	0	3	5	3	17
Sedimentibacter	Bacteria <prokaryotes>	67	6	105	69	54	98
Sedimenticola	Bacteria <prokaryotes>	572	24	890	2084	1223	2414
Segniliparaceae	Bacteria <prokaryotes>	9	13	30	23	10	41
Selaginellaceae	Eukaryota	92	22	373	296	302	594
Selenastraceae	Eukaryota	56	2	258	200	78	352
Selenomonadaceae	Bacteria <prokaryotes>	1984	887	2317	2000	1684	1865
Serpulaceae	Eukaryota	34	7	31	29	14	80
Serrasalmidae	Eukaryota	46	64	128	55	43	144
Shewanellaceae	Bacteria <prokaryotes>	3633	2911	4817	9364	6934	7860
Siderastreidae	Eukaryota	0	0	0	0	0	0
Silphidae	Eukaryota	40	2	96	68	67	141
Simkaniaceae	Bacteria <prokaryotes>	259	143	344	317	251	440
Sinentomidae	Eukaryota	0	0	0	1	0	3
Sinobacteraceae	Bacteria <prokaryotes>	1161	343	1977	3834	2641	4966
Siphonariidae	Eukaryota	0	0	0	0	0	2
Siphoviridae	Viruses	117719	81346	72448	27338	121894	12703
Skeletonemataceae	Eukaryota	1	0	10	13	0	13
Sneathiellaceae	Bacteria <prokaryotes>	3477	824	4351	8141	7219	10016
Solanaceae	Eukaryota	240	55	711	611	428	970
Solibacteraceae	Bacteria <prokaryotes>	446	144	1433	2261	985	2327
Solieriaceae	Eukaryota	0	0	0	1	0	3
Solirubrobacteraceae	Bacteria <prokaryotes>	378	132	885	1124	425	811
Solirubrum	Bacteria <prokaryotes>	76	142	122	194	180	268
Sordariaceae	Eukaryota	48	0	53	103	57	64
Soricidae	Eukaryota	4	3	47	30	7	56
Spalacidae	Eukaryota	1	0	10	10	3	24
Sphaerobacteraceae	Bacteria <prokaryotes>	1402	1960	8883	8114	1097	5581
Sphaeroforma	Eukaryota	1435	1189	1461	655	542	797
Sphaerolipoviridae	Viruses	2	0	0	1	0	0
Sphaeropleaceae	Eukaryota	0	0	1	0	0	0
Spheniscidae	Eukaryota	0	0	14	15	1	24
Sphingobacteriaceae	Bacteria <prokaryotes>	10521	5044	14173	13406	18738	22466
Sphingomonadaceae	Bacteria <prokaryotes>	18495	10940	17131	22756	21103	23037
Spirochaetaceae	Bacteria <prokaryotes>	6012	2656	7640	8815	7247	10494
Spiroplasmataceae	Bacteria <prokaryotes>	346	161	282	180	271	303
Spirulinaceae	Bacteria <prokaryotes>	115	126	443	318	347	432
Spizellomycetaceae	Eukaryota	352	281	821	352	887	688
Spongiibacteraceae	Bacteria <prokaryotes>	4181	1002	11543	23479	18250	38094
Sporanaerobacter	Bacteria <prokaryotes>	409	93	402	317	230	415
Sporichthyaceae	Bacteria <prokaryotes>	100	6	109	276	46	203
Sporidiobolaceae	Eukaryota	43	4	175	135	91	216
Sporocadaceae	Eukaryota	36	12	35	56	31	38
Sporolactobacillaceae	Bacteria <prokaryotes>	633	266	865	816	587	778
Sporolithaceae	Eukaryota	1	0	13	7	7	18
Sporomusaceae	Bacteria <prokaryotes>	2625	1279	3821	3497	4492	3338
Staphylococcaceae	Bacteria <prokaryotes>	2907	1427	3110	2559	2474	2684
Staphylococcus phage tp310-1	Viruses	0	0	0	0	1	0
Stenopodidae	Eukaryota	0	0	0	0	2	0
Stenostomidae	Eukaryota	0	0	0	0	1	1
Stereaceae	Eukaryota	30	2	49	36	10	64
Sterolibacteriaceae	Bacteria <prokaryotes>	599	145	910	1013	1042	1239
Stichococcus	Eukaryota	0	0	0	1	0	0
Stigeoclonium	Eukaryota	0	0	0	1	2	0
Streptococcaceae	Bacteria <prokaryotes>	1805	1160	2733	1607	1975	1576
Streptococcus phage 370.1	Viruses	1	1	3	0	0	0
Streptococcus phage phiARI0004	Viruses	11	11	12	1	10	5
Streptococcus phage phiARI0462	Viruses	0	0	0	1	3	2
Streptomycetaceae	Bacteria <prokaryotes>	16216	7017	13953	16481	10626	11123
Streptosporangiaceae	Bacteria <prokaryotes>	2322	506	2423	4037	1695	2451
Strongylocentrotidae	Eukaryota	148	61	672	609	345	945
Struthionidae	Eukaryota	5	0	6	7	3	8
Sturnidae	Eukaryota	1	0	3	7	1	7
Styelidae	Eukaryota	0	0	0	0	0	0
Stylonemataceae	Eukaryota	0	0	1	3	0	22
Styracaceae	Eukaryota	0	0	1	3	2	0
Succinivibrionaceae	Bacteria <prokaryotes>	928	358	896	855	1191	1441
Suidae	Eukaryota	1	1	7	6	1	11
Sulfitobacter phage NYA-2014a	Viruses	50	13	8	11	35	4
Sulfitobacter phage pCB2047-A	Viruses	7	1	0	3	7	5
Sulfitobacter phage pCB2047-C	Viruses	21	3	22	5	1	2
Sulfolobaceae	Archaea	857	296	805	774	723	599
Sulfolobus monocaudavirus SMV2	Viruses	0	0	0	0	0	0
Sulfurovum	Bacteria <prokaryotes>	486	153	562	310	475	515
Sutterellaceae	Bacteria <prokaryotes>	1039	507	856	678	1966	847
Symbiobacteriaceae	Bacteria <prokaryotes>	109	24	509	755	281	535
Symphyonemataceae	Bacteria <prokaryotes>	153	121	100	63	28	58
Sympoventuriaceae	Eukaryota	12	3	73	76	72	90
Synbranchidae	Eukaryota	20	0	24	48	65	47
Synechococcaceae	Bacteria <prokaryotes>	16915	14521	30362	18444	21557	33931
Synechococcus phage S-CAM22	Viruses	8286	5918	4882	1456	16053	1222
Synechococcus phage S-CAM3	Viruses	11213	6571	6288	3153	11561	1325
Synechococcus phage S-CAM4	Viruses	947	620	587	278	658	64
Synechococcus phage S-CAM7	Viruses	12246	9596	7714	2384	17916	1035
Synechococcus phage S-CAM9	Viruses	92166	58395	38446	8977	84257	6181
Synechococcus phage S-CBP2	Viruses	386	329	188	63	88	8
Synechococcus phage S-CBP3	Viruses	14925	18796	14100	1572	2034	311
Synergistaceae	Bacteria <prokaryotes>	2293	1935	2545	2640	1911	2572
Syngnathidae	Eukaryota	40	1	68	127	27	132
Syntrophaceae	Bacteria <prokaryotes>	1236	744	1931	2393	1497	2770
Syntrophobacteraceae	Bacteria <prokaryotes>	472	145	2255	2993	1540	3537
Syntrophomonadaceae	Bacteria <prokaryotes>	958	315	1594	2231	1034	1977
Syntrophorhabdaceae	Bacteria <prokaryotes>	329	166	875	634	393	739
Talpidae	Eukaryota	61	1	9	4	2	9
Tannerellaceae	Bacteria <prokaryotes>	726	975	1086	1135	1229	1454
Tarsiidae	Eukaryota	9	0	19	20	6	23
Taxaceae	Eukaryota	0	0	1	0	0	1
Tenebrionidae	Eukaryota	25	2	105	121	62	243
Tenrecidae	Eukaryota	61	8	29	49	44	48
Tenthredinidae	Eukaryota	14	2	53	52	38	72
Tephritidae	Eukaryota	154	16	343	332	303	571
Tepidimicrobium	Bacteria <prokaryotes>	523	341	705	379	316	400
Terasakiispira	Bacteria <prokaryotes>	72	31	248	537	581	877
Teratosphaeriaceae	Eukaryota	11	1	33	39	16	74
Termopsidae	Eukaryota	88	53	157	142	82	320
Terrimicrobium	Bacteria <prokaryotes>	288	176	505	1285	697	888
Tetragonuridae	Eukaryota	0	0	1	1	0	1
Tetrahymenidae	Eukaryota	687	169	3867	797	834	7198
Tetranychidae	Eukaryota	56	18	189	168	124	384
Tetraodontidae	Eukaryota	37	20	85	68	57	148
Tetraselmis viridis virus S1	Viruses	2	3	0	1	1	0
Tetraselmis viridis virus S20	Viruses	9	1	1	0	1	1
Thalassiosiraceae	Eukaryota	268	65	1492	1020	542	2111
Theileriidae	Eukaryota	195	48	319	132	148	339
Theria <Mammalia>	Eukaryota	17	1	49	44	24	64
Theridiidae	Eukaryota	148	34	238	243	166	431
Thermaceae	Bacteria <prokaryotes>	1784	703	2766	3628	2141	3099
Thermithiobacillaceae	Bacteria <prokaryotes>	129	114	258	589	333	462
Thermoactinomycetaceae	Bacteria <prokaryotes>	2675	2944	5285	4468	2185	3838
Thermoanaerobacteraceae	Bacteria <prokaryotes>	6623	4254	12512	11765	6156	9783
Thermoanaerobacterales Family III. Incertae Sedis	Bacteria <prokaryotes>	1783	904	4224	3081	2205	3477
Thermoanaerobacterales Family IV. Incertae Sedis	Bacteria <prokaryotes>	104	30	322	393	226	356
Thermoanaerobaculum	Bacteria <prokaryotes>	74	45	572	1156	410	1265
Thermobaculum	Bacteria <prokaryotes>	855	54	5920	4646	1110	4021
Thermobispora	Bacteria <prokaryotes>	80	3	98	207	47	210
Thermococcaceae	Archaea	1190	901	3826	5032	4393	4314
Thermodesulfobacteriaceae	Bacteria <prokaryotes>	1587	512	2988	2604	2312	3268
Thermodesulfobiaceae	Bacteria <prokaryotes>	156	60	414	422	321	467
Thermofilaceae	Archaea	238	70	332	410	282	228
Thermoflexaceae	Bacteria <prokaryotes>	188	91	2226	2771	590	2057
Thermoflexibacter	Bacteria <prokaryotes>	209	79	741	1114	1424	1993
Thermogemmatisporaceae	Bacteria <prokaryotes>	332	78	2377	2745	389	2070
Thermoleophilaceae	Bacteria <prokaryotes>	329	16	639	814	185	469
Thermomicrobiaceae	Bacteria <prokaryotes>	282	12	2627	2224	229	1670
Thermomonosporaceae	Bacteria <prokaryotes>	1370	314	1439	2794	1287	1911
Thermonemataceae	Bacteria <prokaryotes>	509	207	599	677	809	905
Thermopetrobacter	Bacteria <prokaryotes>	616	65	425	873	782	817
Thermoplasmataceae	Archaea	66	194	433	269	395	285
Thermoproteaceae	Archaea	399	243	757	574	591	571
Thermorudis	Bacteria <prokaryotes>	254	29	2402	2038	296	1620
Thermosulfidibacter	Bacteria <prokaryotes>	262	34	790	1147	708	1342
Thermotogaceae	Bacteria <prokaryotes>	1568	341	1766	1670	1340	1714
Thiobacillaceae	Bacteria <prokaryotes>	177	44	300	441	680	574
Thioflexothrix	Bacteria <prokaryotes>	290	24	691	1056	749	1204
Thiohalorhabdus	Bacteria <prokaryotes>	132	44	223	321	203	354
Thiolapillus	Bacteria <prokaryotes>	294	80	636	1155	879	1594
Thiotrichaceae	Bacteria <prokaryotes>	4466	1124	6175	9641	9048	11452
Thoreaceae	Eukaryota	0	1	2	2	1	1
Thorectidae	Eukaryota	0	0	0	0	1	1
Thorselliaceae	Bacteria <prokaryotes>	39	9	111	131	220	234
Thraupidae	Eukaryota	0	1	12	3	1	15
Threskiornithidae	Eukaryota	0	0	1	2	3	1
Tilletiariaceae	Eukaryota	14	0	46	43	17	45
Timonella	Bacteria <prokaryotes>	158	4	68	115	63	44
Tinamidae	Eukaryota	0	0	18	31	13	38
Tissierellaceae	Bacteria <prokaryotes>	572	282	648	578	653	699
Togniniaceae	Eukaryota	8	0	42	22	17	36
Tolypothrichaceae	Bacteria <prokaryotes>	560	207	986	1108	786	939
Tomitella	Bacteria <prokaryotes>	46	9	62	61	9	43
Toxariaceae	Eukaryota	13	6	5	5	4	21
Trachydiscus	Eukaryota	1	0	9	5	2	46
Trebouxiophyceae sp. MX-AZ01	Eukaryota	0	1	0	0	0	2
Tremellaceae	Eukaryota	22	2	36	22	27	73
Treubiaceae	Eukaryota	0	0	0	1	0	0
Trichechidae	Eukaryota	0	0	13	16	3	23
Trichinellidae	Eukaryota	138	28	121	90	78	144
Trichocomaceae	Eukaryota	55	9	112	92	51	185
Trichogrammatidae	Eukaryota	23	4	91	78	50	170
Tricholomataceae	Eukaryota	26	0	35	23	30	41
Trichomonadidae	Eukaryota	115	65	279	153	109	399
Trichomonascaceae	Eukaryota	639	23	1425	1266	1886	1888
Trichoplax	Eukaryota	199	14	323	267	292	482
Trichosarcina	Eukaryota	1	0	0	1	0	2
Trichosporonaceae	Eukaryota	92	61	149	61	56	153
Trigonalidae	Eukaryota	0	0	3	0	1	1
Trionychidae	Eukaryota	58	31	54	41	14	58
Triparmaceae	Eukaryota	22	0	97	45	29	385
Tristromaviridae	Viruses	0	2	0	5	5	2
Trochilidae	Eukaryota	2	0	9	13	4	21
Trogonidae	Eukaryota	1	0	4	3	0	4
Trombiculidae	Eukaryota	0	0	0	0	0	0
Tropheryma	Bacteria <prokaryotes>	3	0	9	4	2	4
Trueperaceae	Bacteria <prokaryotes>	334	90	674	1047	723	929
Trypanosomatidae	Eukaryota	635	64	894	480	500	1160
Tsukamurellaceae	Bacteria <prokaryotes>	34	12	37	101	29	63
Tsukubamonadidae	Eukaryota	0	0	1	4	0	3
Tuberaceae	Eukaryota	20	1	29	25	14	44
Tupaiidae	Eukaryota	7	3	18	9	4	27
Tytonidae	Eukaryota	31	1	8	14	0	20
Udoteaceae	Eukaryota	1	0	0	0	0	2
Ulmaridae	Eukaryota	0	0	2	0	0	1
Ulvaceae	Eukaryota	4	0	1	3	2	0
Unikaryonidae	Eukaryota	429	264	259	117	151	157
Unionidae	Eukaryota	0	0	0	0	0	0
Upogebiidae	Eukaryota	0	0	0	0	1	0
Urechidae	Eukaryota	0	0	0	0	0	0
Ursidae	Eukaryota	4	0	23	26	8	33
Ustilaginaceae	Eukaryota	89	7	166	146	69	225
Vahlkampfiidae	Eukaryota	3394	1870	2207	712	737	1018
Vanhorniidae	Eukaryota	0	0	0	0	0	0
Vaucheriaceae	Eukaryota	0	0	14	7	7	33
Veillonellaceae	Bacteria <prokaryotes>	1247	1538	1803	1546	1434	1517
Ventosimonadaceae	Bacteria <prokaryotes>	21	1	84	129	107	187
Vermetidae	Eukaryota	0	0	0	0	0	2
Verrucariaceae	Eukaryota	11	0	26	13	25	31
Verrucomicrobia subdivision 3	Bacteria <prokaryotes>	657	232	2131	11099	2973	6885
Verrucomicrobiaceae	Bacteria <prokaryotes>	2149	1702	4194	13375	7366	7416
Verrucomicrobiae bacterium DG1235	Bacteria <prokaryotes>	675	155	1344	2632	2735	6143
Vertebrata <Metazoa>	Eukaryota	48	10	122	119	62	223
Vespertilionidae	Eukaryota	10	5	56	39	27	78
Vespidae	Eukaryota	37	8	73	40	59	109
Vibrio phage PWH3a-P1	Viruses	49	24	19	33	32	8
Vibrio phage VBM1	Viruses	12	9	4	77	3	0
Vibrio phage douglas 12A4	Viruses	1	8	7	1	9	0
Vibrio phage eugene 12A10	Viruses	6	1	1	9	1	2
Vibrio phage helene 12B3	Viruses	37	23	14	7	18	7
Vibrio phage henriette 12B8	Viruses	31	5	4	17	27	80
Vibrio phage qdvp001	Viruses	37	26	30	35	66	16
Vibrionaceae	Bacteria <prokaryotes>	32260	22446	25667	65044	34552	25978
Viperidae	Eukaryota	7	0	55	37	43	105
Vitaceae	Eukaryota	67	2	62	34	23	61
Volvocaceae	Eukaryota	460	174	521	513	245	712
Vulgatibacteraceae	Bacteria <prokaryotes>	261	78	869	1525	689	1505
Waddliaceae	Bacteria <prokaryotes>	961	386	750	711	1277	1009
Wallemia	Eukaryota	49	11	104	115	73	194
Watanabea	Eukaryota	0	0	1	1	0	1
Welwitschiaceae	Eukaryota	0	0	0	0	0	0
Wenzhouxiangellaceae	Bacteria <prokaryotes>	289	37	429	810	445	1001
Williamsiaceae	Bacteria <prokaryotes>	95	50	74	141	83	167
Williamwhitmaniaceae	Bacteria <prokaryotes>	310	173	671	772	998	1361
Woeseiaceae	Bacteria <prokaryotes>	2027	438	3568	10257	3597	10570
Wohlfahrtiimonas	Bacteria <prokaryotes>	430	183	564	486	832	874
Wuhan spider virus 8	Viruses	0	0	0	0	0	1
Xanthobacteraceae	Bacteria <prokaryotes>	3641	3107	2368	2597	3403	2505
Xanthomonadaceae	Bacteria <prokaryotes>	5707	5161	5313	7013	6555	7937
Xenococcaceae	Bacteria <prokaryotes>	105	37	306	433	370	534
Xylochloris	Eukaryota	0	0	0	0	1	1
Xylonomycetaceae	Eukaryota	4	3	30	16	11	33
Yellowstone Lake virophage 5	Viruses	12	23	8	13	12	3
Yellowstone Lake virophage 6	Viruses	5	8	3	4	4	1
Yellowstone Lake virophage 7	Viruses	6	4	5	1	4	1
Yersiniaceae	Bacteria <prokaryotes>	1595	810	1775	1402	2459	1999
Zetaproteobacteria bacterium TAG-1	Bacteria <prokaryotes>	253	58	237	316	139	279
Zoanthidae	Eukaryota	0	0	1	0	0	0
Zoogloeaceae	Bacteria <prokaryotes>	709	438	1197	2104	2025	2561
Zygnemataceae	Eukaryota	0	0	2	1	1	6
[Clostridium] ultunense	Bacteria <prokaryotes>	137	32	163	195	146	151
archaeon enrichment culture clone 1(2010)	Archaea	2	2	1	0	0	0
bacterium 2013Arg42i	Bacteria <prokaryotes>	6	4	36	42	62	108
bacterium 2013Ark19i	Bacteria <prokaryotes>	15	1	509	358	117	350
bacterium A37T11	Bacteria <prokaryotes>	128	52	86	79	109	143
bacterium A52C2	Bacteria <prokaryotes>	850	548	479	490	577	433
bacterium JKG1	Bacteria <prokaryotes>	339	122	1453	1519	340	1054
bacterium LF-3	Bacteria <prokaryotes>	20	5	38	30	74	74
bacterium MS4	Bacteria <prokaryotes>	245	75	138	100	943	72
bacterium OL-1	Bacteria <prokaryotes>	22	12	16	17	10	10
bacterium SIT5	Bacteria <prokaryotes>	11	7	34	55	13	40
bacterium SIT6	Bacteria <prokaryotes>	11	0	34	18	10	36
bacterium endosymbiont of Pedicinus badii	Bacteria <prokaryotes>	175	32	108	66	256	274
dsDNA viruses, no RNA stage	Viruses	268	183	90	56	111	17
halophilic archaeon DL31	Archaea	19	9	70	93	39	74
leotiomyceta	Eukaryota	1	0	5	1	1	9
methanogenic archaeon ISO4-H5	Archaea	72	45	710	1390	1121	1048
sulfur-oxidizing symbionts	Bacteria <prokaryotes>	3775	1311	4944	8074	10187	10119
unclassified Actinobacteria (class)	Bacteria <prokaryotes>	9	1	13	34	3	20
unclassified Actinobacteria (class) (miscellaneous)	Bacteria <prokaryotes>	9581	498	7183	23143	3754	9255
unclassified Actinomycetales (miscellaneous)	Bacteria <prokaryotes>	8	0	13	17	22	19
unclassified Alphaproteobacteria	Bacteria <prokaryotes>	756	19	302	954	599	900
unclassified Alphaproteobacteria (miscellaneous)	Bacteria <prokaryotes>	12827	1763	11936	23880	24135	31942
unclassified Alteromonadales	Bacteria <prokaryotes>	420	209	893	1850	1721	2772
unclassified Bacillales	Bacteria <prokaryotes>	1	0	21	8	6	6
unclassified Bacilli (miscellaneous)	Bacteria <prokaryotes>	39	0	16	49	41	27
unclassified Bacteria	Bacteria <prokaryotes>	44	1	61	68	135	129
unclassified Bacteroidales	Bacteria <prokaryotes>	7	10	11	19	19	22
unclassified Bacteroidales (miscellaneous)	Bacteria <prokaryotes>	444	206	946	1150	1501	1472
unclassified Bacteroidetes (miscellaneous)	Bacteria <prokaryotes>	52	36	177	184	365	383
unclassified Bacteroidetes/Chlorobi group	Bacteria <prokaryotes>	678	432	604	686	1107	1045
unclassified Betaproteobacteria	Bacteria <prokaryotes>	114	14	29	115	40	59
unclassified Betaproteobacteria (miscellaneous)	Bacteria <prokaryotes>	5285	4283	4125	3805	4618	2615
unclassified Burkholderiales	Bacteria <prokaryotes>	275	146	171	247	156	178
unclassified Burkholderiales (miscellaneous)	Bacteria <prokaryotes>	117	61	206	193	412	228
unclassified Caudovirales	Viruses	28769	31519	18522	6323	18076	2696
unclassified Chalmydiales (miscellaneous)	Bacteria <prokaryotes>	198	50	279	268	234	442
unclassified Clostridia (miscellaneous)	Bacteria <prokaryotes>	271	149	169	114	76	75
unclassified Clostridiales	Bacteria <prokaryotes>	60	26	58	52	65	49
unclassified Clostridiales (miscellaneous)	Bacteria <prokaryotes>	1645	1017	2887	2679	1395	2200
unclassified Coriobacteriales	Bacteria <prokaryotes>	50	14	18	28	17	11
unclassified Cyanobacteria	Bacteria <prokaryotes>	17	2	12	4	6	6
unclassified Cyanobacteria (miscellaneous)	Bacteria <prokaryotes>	421	218	1256	931	1412	1712
unclassified Deltaproteobacteria	Bacteria <prokaryotes>	329	403	184	149	81	39
unclassified Deltaproteobacteria (miscellaneous)	Bacteria <prokaryotes>	1185	645	2097	2664	1588	3118
unclassified Firmicutes sensu stricto (miscellaneous)	Bacteria <prokaryotes>	41	7	127	85	71	129
unclassified Flavobacteriales (miscellaneous)	Bacteria <prokaryotes>	232	87	715	1110	2096	1552
unclassified Frankiales (miscellaneous)	Bacteria <prokaryotes>	153	42	85	198	85	62
unclassified Gammaproteobacteria	Bacteria <prokaryotes>	179	21	525	826	1200	1417
unclassified Gammaproteobacteria (miscellaneous)	Bacteria <prokaryotes>	2047	427	4719	8421	12788	13391
unclassified Halobacteriales (miscellaneous)	Archaea	6	4	17	21	8	14
unclassified Micrococcales (miscellaneous)	Bacteria <prokaryotes>	40	5	38	78	19	23
unclassified Nitrosomonadales	Bacteria <prokaryotes>	105	51	138	182	147	247
unclassified Nostocales (miscellaneous)	Bacteria <prokaryotes>	2300	2980	1688	381	381	219
unclassified Oscillatoriales	Bacteria <prokaryotes>	0	0	0	0	0	1
unclassified Oscillatoriales (miscellaneous)	Bacteria <prokaryotes>	372	131	601	585	815	546
unclassified Rhizobiales	Bacteria <prokaryotes>	100	27	216	434	142	494
unclassified Rhizobiales (miscellaneous)	Bacteria <prokaryotes>	565	189	960	1604	1695	1870
unclassified Rhodobacterales	Bacteria <prokaryotes>	558	33	1537	3987	4388	2816
unclassified Rhodospirillales	Bacteria <prokaryotes>	1	0	3	4	3	6
unclassified Rhodospirillales (miscellaneous)	Bacteria <prokaryotes>	3001	1537	4670	7722	4330	8362
unclassified Rickettsiales (miscellaneous)	Bacteria <prokaryotes>	403	75	619	673	1071	960
unclassified Solirubrobacterales	Bacteria <prokaryotes>	239	12	287	514	255	324
unclassified Sphingobacteriales	Bacteria <prokaryotes>	71	14	173	206	271	390
unclassified Sphingobacteriales (miscellaneous)	Bacteria <prokaryotes>	740	216	1910	2850	3215	4774
unclassified Sphingomonadales	Bacteria <prokaryotes>	636	32	370	803	415	1005
unclassified Thaumarchaeota	Archaea	284	104	1474	1092	6671	2815
unclassified Thaumarchaeota (miscellaneous)	Archaea	127	57	1034	762	4696	1860
unclassified Thermoplasmatales (miscellaneous)	Archaea	34	7	476	923	671	817
unclassified Thiotrichales	Bacteria <prokaryotes>	2	0	4	9	2	3
unclassified Tissierellia (miscellaneous)	Bacteria <prokaryotes>	78	14	168	108	314	305
unclassified Verrucomicrobia	Bacteria <prokaryotes>	94	22	974	3293	2371	1972
unclassified Verrucomicrobia (miscellaneous)	Bacteria <prokaryotes>	21311	16925	18009	19358	85028	18977
unclassified Vibrionales	Bacteria <prokaryotes>	19	6	23	722	32	15
unclassified pseudomonads	Bacteria <prokaryotes>	4	0	3	9	19	14
uncultured Termite group 1 bacterium	Bacteria <prokaryotes>	19	8	51	41	65	73
uncultured bacterium	Bacteria <prokaryotes>	0	0	0	0	0	0
uncultured bacterium AST3	Bacteria <prokaryotes>	0	0	0	0	2	0
uncultured bacterium BLR3	Bacteria <prokaryotes>	0	0	0	0	0	2
uncultured bacterium BLR9	Bacteria <prokaryotes>	0	0	0	0	2	1
uncultured bacterium HH1107	Bacteria <prokaryotes>	0	0	0	0	0	1
uncultured bacterium pMCBF6	Bacteria <prokaryotes>	0	0	1	0	2	1
uncultured crAssphage	Viruses	6	18	9	9	1	2
