# Supplementary material for: Microbial sources of exocellular DNA in the ocean
Source: Research Square preprint supplement (doi:10.21203/rs.3.rs-431074/v1), 2021-05-05
Supplement: Supplementary file 5 [file d0fdeeef42b4d6ad3b95392b.xlsx]

## Sheet: Summary
Dataset S5	Data (as proportions) used in main text. Depth- and domain-assigned gene counts for each dissolved DNA sample (vesicle, viral, and free DNA) annotated from the ALOHA 2.0 catalog metadata
Sheet1:DepthOriginDDNA
Column Descriptions
Sample Name	Sample Name
Sample Collection Depth	Depth (m)
Dissolved DNA Type	(Vesicle, Virus, FDNA)
Sample Location	Coordinates sample was collected from
Depth Origin (m)	Sample representative gene was assembled from (5-1000 m) at Station ALOHA (22° 45'N, 158° 00'W)
Proportion	Proportion from depth
Columns H-L	Proportion of depth-assigned genes to each domain (H;Viruses, I;Bacteria,J;Eukaryota, K;Archaea, L;Unknown)

## Sheet: DepthOriginDDNA
Sample Name	Sample Collection Depth (m)	Dissolved DNA Type	Sample Location	Cruise Number	Depth Origin (m)	Proportion	Viruses	Bacteria	Eukaryota	Archaea	Unknown
Ves75	75	Vesicle	(22° 45'N, 158° 00'W)	HOT297	5	0.0751081	0.00712419	0.031392	0.000249843	0.000188965	0.0361531
Ves75	75	Vesicle	(22° 45'N, 158° 00'W)	HOT297	15	0.0997857	0.00609495	0.0620328	0.000342316	0.000225395	0.0310902
Ves75	75	Vesicle	(22° 45'N, 158° 00'W)	HOT297	25	0.0885212	0.00556055	0.049686	0.000344641	0.000215004	0.032715
Ves75	75	Vesicle	(22° 45'N, 158° 00'W)	HOT297	45	0.0851408	0.00743422	0.037166	0.000236052	0.000210505	0.0400941
Ves75	75	Vesicle	(22° 45'N, 158° 00'W)	HOT297	75	0.102524	0.00817	0.0497064	0.000306844	0.000271853	0.0440694
Ves75	75	Vesicle	(22° 45'N, 158° 00'W)	HOT297	100	0.117537	0.0114828	0.0434882	0.000310913	0.000298299	0.0619567
Ves75	75	Vesicle	(22° 45'N, 158° 00'W)	HOT297	125	0.1317	0.00742661	0.0650288	0.000445916	0.000357651	0.0584406
Ves75	75	Vesicle	(22° 45'N, 158° 00'W)	HOT297	150	0.0849001	0.00545054	0.0394893	0.000286397	0.000200994	0.0394729
Ves75	75	Vesicle	(22° 45'N, 158° 00'W)	HOT297	175	0.0621999	0.00390055	0.0259154	0.000166172	0.0001485	0.0320693
Ves75	75	Vesicle	(22° 45'N, 158° 00'W)	HOT297	200	0.0549739	0.00275868	0.0294231	0.000168141	0.000147704	0.0224763
Ves75	75	Vesicle	(22° 45'N, 158° 00'W)	HOT297	225	0.0396338	0.00246723	0.0163918	0.000101094	0.000113419	0.0205603
Ves75	75	Vesicle	(22° 45'N, 158° 00'W)	HOT297	250	0.0275368	0.00156164	0.0102278	7.42549e-05	7.39234e-05	0.0155992
Ves75	75	Vesicle	(22° 45'N, 158° 00'W)	HOT297	500	0.0193281	0.000536274	0.0109454	0.0001298	9.91423e-05	0.00761755
Ves75	75	Vesicle	(22° 45'N, 158° 00'W)	HOT297	750	0.00192814	2.69366e-05	0.00159108	1.47791e-05	2.20507e-05	0.00027329
Ves75	75	Vesicle	(22° 45'N, 158° 00'W)	HOT297	770	0.00427546	8.01004e-05	0.00346532	1.47337e-05	2.34151e-05	0.00069189
Ves75	75	Vesicle	(22° 45'N, 158° 00'W)	HOT297	1000	0.00252677	4.40199e-05	0.00198055	1.10974e-05	1.23179e-05	0.000478784
Ves75	75	Vesicle	(22° 45'N, 158° 00'W)	HOT297	4000	0.00184309	4.9097e-05	0.00124532	8.35477e-06	1.92262e-05	0.000521098
Ves125	125	Vesicle	(22° 45'N, 158° 00'W)	HOT297	5	0.0322118	0.000856439	0.0253134	8.75072e-05	6.36235e-05	0.00589084
Ves125	125	Vesicle	(22° 45'N, 158° 00'W)	HOT297	15	0.0656236	0.000838432	0.055804	0.000180808	0.000129698	0.0086707
Ves125	125	Vesicle	(22° 45'N, 158° 00'W)	HOT297	25	0.0551023	0.000790075	0.0455501	0.000189834	0.000149151	0.00842316
Ves125	125	Vesicle	(22° 45'N, 158° 00'W)	HOT297	45	0.0395213	0.000973293	0.0311006	0.000100629	9.55123e-05	0.0072512
Ves125	125	Vesicle	(22° 45'N, 158° 00'W)	HOT297	75	0.0592011	0.00129063	0.0468137	0.000163522	0.000147825	0.0107854
Ves125	125	Vesicle	(22° 45'N, 158° 00'W)	HOT297	100	0.0680227	0.00356943	0.0463073	0.000153676	0.000213486	0.0177787
Ves125	125	Vesicle	(22° 45'N, 158° 00'W)	HOT297	125	0.154742	0.00535982	0.112075	0.000473629	0.00113531	0.0356975
Ves125	125	Vesicle	(22° 45'N, 158° 00'W)	HOT297	150	0.125269	0.00607869	0.0824988	0.000382207	0.00154341	0.0347662
Ves125	125	Vesicle	(22° 45'N, 158° 00'W)	HOT297	175	0.104834	0.00475207	0.0672211	0.000342786	0.00169049	0.0308273
Ves125	125	Vesicle	(22° 45'N, 158° 00'W)	HOT297	200	0.12018	0.00343109	0.0876069	0.000315779	0.00199923	0.0268266
Ves125	125	Vesicle	(22° 45'N, 158° 00'W)	HOT297	225	0.0700984	0.00279268	0.0465606	0.000169892	0.00120432	0.0193709
Ves125	125	Vesicle	(22° 45'N, 158° 00'W)	HOT297	250	0.0478546	0.00193955	0.0315249	0.000113684	0.000790069	0.0134864
Ves125	125	Vesicle	(22° 45'N, 158° 00'W)	HOT297	500	0.0315954	0.000467005	0.0243977	0.000133462	0.000219437	0.00637785
Ves125	125	Vesicle	(22° 45'N, 158° 00'W)	HOT297	750	0.00450802	2.20889e-05	0.00409175	1.52645e-05	4.40033e-05	0.000334914
Ves125	125	Vesicle	(22° 45'N, 158° 00'W)	HOT297	770	0.0125866	0.000116796	0.0107848	3.16991e-05	0.000288639	0.00136466
Ves125	125	Vesicle	(22° 45'N, 158° 00'W)	HOT297	1000	0.00585738	5.16337e-05	0.00509659	1.8386e-05	5.23757e-05	0.000638393
Ves125	125	Vesicle	(22° 45'N, 158° 00'W)	HOT297	4000	0.00232641	1.85487e-05	0.00199404	7.88447e-06	2.86082e-05	0.000277327
Ves500	500	Vesicle	(22° 45'N, 158° 00'W)	HOT297	5	0.0570685	0.00213375	0.0454391	0.000269268	0.000154246	0.00907221
Ves500	500	Vesicle	(22° 45'N, 158° 00'W)	HOT297	15	0.156458	0.0018051	0.131972	0.000702206	0.000484461	0.0214948
Ves500	500	Vesicle	(22° 45'N, 158° 00'W)	HOT297	25	0.097849	0.00216597	0.0782046	0.000536901	0.000329751	0.0166118
Ves500	500	Vesicle	(22° 45'N, 158° 00'W)	HOT297	45	0.0643831	0.00218956	0.0515615	0.000300313	0.000190022	0.0101417
Ves500	500	Vesicle	(22° 45'N, 158° 00'W)	HOT297	75	0.0720131	0.00214947	0.0567549	0.000371699	0.000256353	0.0124808
Ves500	500	Vesicle	(22° 45'N, 158° 00'W)	HOT297	100	0.0343936	0.0015453	0.0266084	0.000174196	0.000100869	0.00596487
Ves500	500	Vesicle	(22° 45'N, 158° 00'W)	HOT297	125	0.0366012	0.000945366	0.0284072	0.000242262	0.000182621	0.00682382
Ves500	500	Vesicle	(22° 45'N, 158° 00'W)	HOT297	150	0.0247593	0.000670922	0.0180885	0.000151603	0.000319315	0.00552894
Ves500	500	Vesicle	(22° 45'N, 158° 00'W)	HOT297	175	0.0187574	0.00066467	0.0116635	8.65785e-05	0.000731104	0.00561153
Ves500	500	Vesicle	(22° 45'N, 158° 00'W)	HOT297	200	0.0266837	0.000753523	0.0169627	0.000107928	0.00210659	0.00675292
Ves500	500	Vesicle	(22° 45'N, 158° 00'W)	HOT297	225	0.0291954	0.00135409	0.0130353	9.24129e-05	0.00257569	0.0121379
Ves500	500	Vesicle	(22° 45'N, 158° 00'W)	HOT297	250	0.0380331	0.00169548	0.0151859	0.000105028	0.00433788	0.0167088
Ves500	500	Vesicle	(22° 45'N, 158° 00'W)	HOT297	500	0.229235	0.00930678	0.0641669	0.000607871	0.0203527	0.134801
Ves500	500	Vesicle	(22° 45'N, 158° 00'W)	HOT297	750	0.0240786	0.000380651	0.011733	6.4146e-05	0.00801955	0.00388117
Ves500	500	Vesicle	(22° 45'N, 158° 00'W)	HOT297	770	0.0452611	0.000907359	0.022674	9.51956e-05	0.0128018	0.00878273
Ves500	500	Vesicle	(22° 45'N, 158° 00'W)	HOT297	1000	0.0329633	0.000576238	0.0150152	7.49888e-05	0.0109635	0.00633328
Ves500	500	Vesicle	(22° 45'N, 158° 00'W)	HOT297	4000	0.0108914	0.000192533	0.00656188	2.91046e-05	0.00198594	0.00212195
Vir75	75	Virus	(22° 45'N, 158° 00'W)	HOT297	5	0.0880411	0.0207236	0.0157387	0.000167621	0.000198303	0.0512129
Vir75	75	Virus	(22° 45'N, 158° 00'W)	HOT297	15	0.0638863	0.0140522	0.0145647	0.000164122	0.000147141	0.0349581
Vir75	75	Virus	(22° 45'N, 158° 00'W)	HOT297	25	0.0644071	0.0157639	0.0115133	0.000149938	0.000142124	0.0368378
Vir75	75	Virus	(22° 45'N, 158° 00'W)	HOT297	45	0.0939195	0.0215364	0.0165812	0.000190624	0.000212046	0.0553992
Vir75	75	Virus	(22° 45'N, 158° 00'W)	HOT297	75	0.103291	0.0264124	0.0169843	0.000220872	0.000214953	0.0594582
Vir75	75	Virus	(22° 45'N, 158° 00'W)	HOT297	100	0.169614	0.0414815	0.0271038	0.000348557	0.000377088	0.100303
Vir75	75	Virus	(22° 45'N, 158° 00'W)	HOT297	125	0.12315	0.0276278	0.0204721	0.000331649	0.000288164	0.0744305
Vir75	75	Virus	(22° 45'N, 158° 00'W)	HOT297	150	0.092928	0.020046	0.0163114	0.00027883	0.000241494	0.0560502
Vir75	75	Virus	(22° 45'N, 158° 00'W)	HOT297	175	0.0694397	0.0123856	0.012889	0.000178913	0.000171092	0.043815
Vir75	75	Virus	(22° 45'N, 158° 00'W)	HOT297	200	0.0458525	0.00849985	0.00887798	0.000132526	0.000121649	0.0282205
Vir75	75	Virus	(22° 45'N, 158° 00'W)	HOT297	225	0.0427623	0.00720411	0.00851682	0.000127415	0.000112237	0.0268017
Vir75	75	Virus	(22° 45'N, 158° 00'W)	HOT297	250	0.0273894	0.00424461	0.0057756	7.58395e-05	6.82083e-05	0.0172251
Vir75	75	Virus	(22° 45'N, 158° 00'W)	HOT297	500	0.0126746	0.000984645	0.00305049	5.45793e-05	4.94031e-05	0.00853547
Vir75	75	Virus	(22° 45'N, 158° 00'W)	HOT297	750	0.000224169	1.79484e-05	0.000103221	1.83111e-06	2.33662e-06	9.88316e-05
Vir75	75	Virus	(22° 45'N, 158° 00'W)	HOT297	770	0.000655314	8.45685e-05	0.000256471	2.80068e-06	5.89484e-06	0.000305579
Vir75	75	Virus	(22° 45'N, 158° 00'W)	HOT297	1000	0.000525972	9.8247e-05	0.000164452	3.05578e-06	2.86078e-06	0.000257357
Vir75	75	Virus	(22° 45'N, 158° 00'W)	HOT297	4000	0.000783344	5.87112e-05	0.000267949	6.66224e-06	7.04259e-06	0.000442979
Vir100	100	Virus	(22° 17'N, 157° 01'W)	FK180310	5	0.0454432	0.00905389	0.0088395	9.33596e-05	0.000121622	0.0273348
Vir100	100	Virus	(22° 17'N, 157° 01'W)	FK180310	15	0.0435639	0.0075556	0.0123988	0.000101083	0.000100541	0.0234078
Vir100	100	Virus	(22° 17'N, 157° 01'W)	FK180310	25	0.0336902	0.00684852	0.00632072	8.21588e-05	8.52247e-05	0.0203536
Vir100	100	Virus	(22° 17'N, 157° 01'W)	FK180310	45	0.0482157	0.00952263	0.00911023	0.000107321	0.000126093	0.0293494
Vir100	100	Virus	(22° 17'N, 157° 01'W)	FK180310	75	0.0505835	0.0110601	0.0087789	0.000111835	0.000115507	0.0305171
Vir100	100	Virus	(22° 17'N, 157° 01'W)	FK180310	100	0.103783	0.02608	0.0167202	0.000192753	0.000220697	0.0605698
Vir100	100	Virus	(22° 17'N, 157° 01'W)	FK180310	125	0.123016	0.0323708	0.0185141	0.000241598	0.000226831	0.0716625
Vir100	100	Virus	(22° 17'N, 157° 01'W)	FK180310	150	0.156761	0.0379986	0.0240147	0.000364907	0.000329191	0.0940533
Vir100	100	Virus	(22° 17'N, 157° 01'W)	FK180310	175	0.132133	0.0252521	0.0220197	0.000264551	0.00030109	0.0842954
Vir100	100	Virus	(22° 17'N, 157° 01'W)	FK180310	200	0.0900857	0.0168944	0.015267	0.000185748	0.000209486	0.0575291
Vir100	100	Virus	(22° 17'N, 157° 01'W)	FK180310	225	0.0830989	0.0135446	0.0152803	0.000182146	0.000200726	0.0538911
Vir100	100	Virus	(22° 17'N, 157° 01'W)	FK180310	250	0.0552772	0.00863268	0.0105694	0.00011381	0.000124665	0.0358366
Vir100	100	Virus	(22° 17'N, 157° 01'W)	FK180310	500	0.0240688	0.00114958	0.0115826	4.43022e-05	3.73638e-05	0.011255
Vir100	100	Virus	(22° 17'N, 157° 01'W)	FK180310	750	0.000291893	2.6112e-05	0.000154716	8.21862e-07	1.66311e-06	0.000108581
Vir100	100	Virus	(22° 17'N, 157° 01'W)	FK180310	770	0.0060924	0.000231664	0.00476228	3.63399e-06	4.33461e-06	0.00109049
Vir100	100	Virus	(22° 17'N, 157° 01'W)	FK180310	1000	0.00239816	0.000152653	0.00171257	2.52428e-06	4.29808e-06	0.000526111
Vir100	100	Virus	(22° 17'N, 157° 01'W)	FK180310	4000	0.00113192	3.55394e-05	0.000806594	3.27078e-06	3.60983e-06	0.000282905
Vir125	125	Virus	(22° 45'N, 158° 00'W)	HOT297	5	0.0209891	0.00374859	0.00432066	6.61827e-05	6.13205e-05	0.0127924
Vir125	125	Virus	(22° 45'N, 158° 00'W)	HOT297	15	0.0166953	0.00254602	0.00499226	6.13246e-05	5.5161e-05	0.00904056
Vir125	125	Virus	(22° 45'N, 158° 00'W)	HOT297	25	0.0154715	0.00270835	0.00328146	6.35363e-05	4.6055e-05	0.0093721
Vir125	125	Virus	(22° 45'N, 158° 00'W)	HOT297	45	0.0253372	0.00423406	0.0050055	8.22058e-05	7.33027e-05	0.0159421
Vir125	125	Virus	(22° 45'N, 158° 00'W)	HOT297	75	0.0332468	0.00617574	0.00622423	0.000102375	8.1719e-05	0.0206628
Vir125	125	Virus	(22° 45'N, 158° 00'W)	HOT297	100	0.100371	0.0235112	0.0163906	0.000217418	0.000217977	0.0600343
Vir125	125	Virus	(22° 45'N, 158° 00'W)	HOT297	125	0.15634	0.0347986	0.024779	0.000351813	0.000324623	0.0960858
Vir125	125	Virus	(22° 45'N, 158° 00'W)	HOT297	150	0.194297	0.0424258	0.0312851	0.000419944	0.00049047	0.119676
Vir125	125	Virus	(22° 45'N, 158° 00'W)	HOT297	175	0.168085	0.029457	0.0294208	0.000377927	0.00044216	0.108387
Vir125	125	Virus	(22° 45'N, 158° 00'W)	HOT297	200	0.100136	0.0180678	0.017575	0.000232732	0.000270096	0.0639903
Vir125	125	Virus	(22° 45'N, 158° 00'W)	HOT297	225	0.0868935	0.0139019	0.0162569	0.0002152	0.000244153	0.0562753
Vir125	125	Virus	(22° 45'N, 158° 00'W)	HOT297	250	0.0585012	0.00888168	0.0113523	0.00014179	0.000150416	0.0379751
Vir125	125	Virus	(22° 45'N, 158° 00'W)	HOT297	500	0.0197505	0.00126405	0.00420963	5.83116e-05	6.49686e-05	0.0141535
Vir125	125	Virus	(22° 45'N, 158° 00'W)	HOT297	750	0.000291075	3.34629e-05	0.000114996	1.71249e-06	2.02753e-06	0.000138876
Vir125	125	Virus	(22° 45'N, 158° 00'W)	HOT297	770	0.00158271	0.000269025	0.000442141	4.27155e-06	8.78943e-06	0.000858478
Vir125	125	Virus	(22° 45'N, 158° 00'W)	HOT297	1000	0.000795443	0.000144049	0.000218605	3.81688e-06	6.89011e-06	0.000422082
Vir125	125	Virus	(22° 45'N, 158° 00'W)	HOT297	4000	0.000801862	5.81849e-05	0.000266857	5.39651e-06	7.43411e-06	0.000463989
Vir250	250	Virus	(22° 17'N, 157° 01'W)	FK180310	5	0.00517804	0.000837558	0.00149178	1.39838e-05	1.64796e-05	0.00281823
Vir250	250	Virus	(22° 17'N, 157° 01'W)	FK180310	15	0.00965447	0.000939344	0.00601676	1.90397e-05	1.49297e-05	0.0026644
Vir250	250	Virus	(22° 17'N, 157° 01'W)	FK180310	25	0.00418876	0.000602916	0.00124753	1.44867e-05	1.2517e-05	0.00231131
Vir250	250	Virus	(22° 17'N, 157° 01'W)	FK180310	45	0.00576002	0.000864775	0.00158218	1.50189e-05	1.93361e-05	0.0032787
Vir250	250	Virus	(22° 17'N, 157° 01'W)	FK180310	75	0.00671057	0.000942124	0.00175866	2.66091e-05	1.99032e-05	0.00396327
Vir250	250	Virus	(22° 17'N, 157° 01'W)	FK180310	100	0.0147625	0.00204955	0.00341425	4.77724e-05	4.42394e-05	0.00920666
Vir250	250	Virus	(22° 17'N, 157° 01'W)	FK180310	125	0.0249262	0.00291765	0.00515807	9.05815e-05	6.32348e-05	0.0166966
Vir250	250	Virus	(22° 17'N, 157° 01'W)	FK180310	150	0.0461879	0.00517559	0.0092951	0.000193873	0.000124918	0.0313985
Vir250	250	Virus	(22° 17'N, 157° 01'W)	FK180310	175	0.078815	0.00781398	0.0156517	0.000167931	0.000200443	0.0549809
Vir250	250	Virus	(22° 17'N, 157° 01'W)	FK180310	200	0.0954624	0.00925099	0.0182763	0.000212244	0.000236771	0.067486
Vir250	250	Virus	(22° 17'N, 157° 01'W)	FK180310	225	0.216723	0.0181883	0.0402899	0.000440188	0.000526458	0.157278
Vir250	250	Virus	(22° 17'N, 157° 01'W)	FK180310	250	0.283249	0.0223872	0.0519526	0.000598462	0.000666901	0.207644
Vir250	250	Virus	(22° 17'N, 157° 01'W)	FK180310	500	0.188162	0.011994	0.0361477	0.000442524	0.000397365	0.13918
Vir250	250	Virus	(22° 17'N, 157° 01'W)	FK180310	750	0.00247911	0.000279416	0.000819925	7.68145e-06	1.15357e-05	0.00136056
Vir250	250	Virus	(22° 17'N, 157° 01'W)	FK180310	770	0.00862254	0.000883859	0.00320611	2.37396e-05	2.41474e-05	0.00448468
Vir250	250	Virus	(22° 17'N, 157° 01'W)	FK180310	1000	0.00590156	0.000690065	0.00193527	2.0588e-05	1.81822e-05	0.00323745
Vir250	250	Virus	(22° 17'N, 157° 01'W)	FK180310	4000	0.00254342	0.000198937	0.000912496	9.52343e-06	9.46657e-06	0.001413
Vir500	500	Virus	(22° 45'N, 158° 00'W)	HOT297	5	0.00919851	0.00260427	0.00211417	4.67221e-05	2.7384e-05	0.00440597
Vir500	500	Virus	(22° 45'N, 158° 00'W)	HOT297	15	0.0112042	0.00206069	0.0048127	4.56415e-05	3.51886e-05	0.00424998
Vir500	500	Virus	(22° 45'N, 158° 00'W)	HOT297	25	0.00871166	0.0022625	0.00219681	5.98198e-05	2.97186e-05	0.00416281
Vir500	500	Virus	(22° 45'N, 158° 00'W)	HOT297	45	0.00929291	0.00255883	0.00216668	3.89584e-05	2.98066e-05	0.00449862
Vir500	500	Virus	(22° 45'N, 158° 00'W)	HOT297	75	0.00959347	0.00257784	0.00217839	6.02462e-05	2.93282e-05	0.00474767
Vir500	500	Virus	(22° 45'N, 158° 00'W)	HOT297	100	0.00980525	0.00202819	0.00218218	4.7095e-05	3.88941e-05	0.00550889
Vir500	500	Virus	(22° 45'N, 158° 00'W)	HOT297	125	0.0115327	0.00141038	0.00260786	7.03863e-05	4.694e-05	0.00739716
Vir500	500	Virus	(22° 45'N, 158° 00'W)	HOT297	150	0.0166948	0.00164327	0.00383937	0.000101602	6.56563e-05	0.0110449
Vir500	500	Virus	(22° 45'N, 158° 00'W)	HOT297	175	0.0238716	0.00211665	0.00550699	9.03767e-05	8.87952e-05	0.0160688
Vir500	500	Virus	(22° 45'N, 158° 00'W)	HOT297	200	0.0289305	0.002534	0.00652895	0.000117964	0.000127143	0.0196225
Vir500	500	Virus	(22° 45'N, 158° 00'W)	HOT297	225	0.0665424	0.00540742	0.0147842	0.000200599	0.000233141	0.0459171
Vir500	500	Virus	(22° 45'N, 158° 00'W)	HOT297	250	0.0875206	0.00695981	0.0190981	0.00024487	0.000329195	0.0608886
Vir500	500	Virus	(22° 45'N, 158° 00'W)	HOT297	500	0.639928	0.0359855	0.108859	0.00151973	0.0018332	0.49173
Vir500	500	Virus	(22° 45'N, 158° 00'W)	HOT297	750	0.0106797	0.00116084	0.00277981	3.78627e-05	0.000198066	0.00650316
Vir500	500	Virus	(22° 45'N, 158° 00'W)	HOT297	770	0.0268	0.00288389	0.00680234	8.72887e-05	0.00034575	0.0166807
Vir500	500	Virus	(22° 45'N, 158° 00'W)	HOT297	1000	0.0188277	0.00199309	0.00447928	7.16007e-05	0.000270021	0.0120137
Vir500	500	Virus	(22° 45'N, 158° 00'W)	HOT297	4000	0.00822506	0.000699509	0.00226076	3.64177e-05	7.68422e-05	0.00515153
FDNA75	75	FDNA	(22° 45'N, 158° 00'W)	HOT297	5	0.0827063	0.0255549	0.0197685	0.000288077	0.000183796	0.036911
FDNA75	75	FDNA	(22° 45'N, 158° 00'W)	HOT297	15	0.0892173	0.0219153	0.0342347	0.000323322	0.000183378	0.0325606
FDNA75	75	FDNA	(22° 45'N, 158° 00'W)	HOT297	25	0.0802865	0.0207227	0.0269194	0.000440638	0.000183334	0.0320204
FDNA75	75	FDNA	(22° 45'N, 158° 00'W)	HOT297	45	0.0882319	0.0261113	0.0227569	0.000312781	0.000205443	0.0388455
FDNA75	75	FDNA	(22° 45'N, 158° 00'W)	HOT297	75	0.110185	0.0324959	0.0304174	0.00042762	0.000253538	0.0465909
FDNA75	75	FDNA	(22° 45'N, 158° 00'W)	HOT297	100	0.144853	0.046573	0.0317768	0.000475594	0.000353936	0.0656736
FDNA75	75	FDNA	(22° 45'N, 158° 00'W)	HOT297	125	0.130515	0.0335552	0.0408694	0.000666828	0.000431523	0.0549924
FDNA75	75	FDNA	(22° 45'N, 158° 00'W)	HOT297	150	0.0890527	0.0228112	0.0261898	0.00048015	0.000359079	0.0392125
FDNA75	75	FDNA	(22° 45'N, 158° 00'W)	HOT297	175	0.0594555	0.0134474	0.0171529	0.00029115	0.000267132	0.0282969
FDNA75	75	FDNA	(22° 45'N, 158° 00'W)	HOT297	200	0.047343	0.00973259	0.0178873	0.000301693	0.000260384	0.0191611
FDNA75	75	FDNA	(22° 45'N, 158° 00'W)	HOT297	225	0.0351448	0.00768001	0.0108811	0.000226086	0.000190269	0.0161673
FDNA75	75	FDNA	(22° 45'N, 158° 00'W)	HOT297	250	0.0207264	0.00432959	0.00656539	0.000141184	0.00012822	0.00956202
FDNA75	75	FDNA	(22° 45'N, 158° 00'W)	HOT297	500	0.0146099	0.00136165	0.00648961	0.000173181	0.000154922	0.00643056
FDNA75	75	FDNA	(22° 45'N, 158° 00'W)	HOT297	750	0.00134492	6.32485e-05	0.000925193	2.51177e-05	3.55329e-05	0.000295825
FDNA75	75	FDNA	(22° 45'N, 158° 00'W)	HOT297	770	0.00273598	0.000153209	0.00196683	2.10391e-05	7.02219e-05	0.00052468
FDNA75	75	FDNA	(22° 45'N, 158° 00'W)	HOT297	1000	0.00186102	0.000148368	0.00115192	1.82863e-05	4.65042e-05	0.000495943
FDNA75	75	FDNA	(22° 45'N, 158° 00'W)	HOT297	4000	0.0012291	7.2348e-05	0.00061427	1.29708e-05	2.34592e-05	0.000506051
FDNA100	100	FDNA	(22° 17'N, 157° 01'W)	FK180310	5	0.0455781	0.0167585	0.00617157	0.00012937	9.93412e-05	0.0224194
FDNA100	100	FDNA	(22° 17'N, 157° 01'W)	FK180310	15	0.0707191	0.0152708	0.0346158	0.000139083	8.2053e-05	0.0206113
FDNA100	100	FDNA	(22° 17'N, 157° 01'W)	FK180310	25	0.0372715	0.0136366	0.00524317	0.000115262	7.73505e-05	0.0181991
FDNA100	100	FDNA	(22° 17'N, 157° 01'W)	FK180310	45	0.0495867	0.0184448	0.00660554	0.000129399	0.000109167	0.0242978
FDNA100	100	FDNA	(22° 17'N, 157° 01'W)	FK180310	75	0.0582451	0.0232324	0.00727506	0.000157968	0.000111177	0.0274684
FDNA100	100	FDNA	(22° 17'N, 157° 01'W)	FK180310	100	0.119421	0.0521889	0.0144103	0.000269793	0.000199531	0.0523522
FDNA100	100	FDNA	(22° 17'N, 157° 01'W)	FK180310	125	0.14779	0.0617917	0.016165	0.00031266	0.000211194	0.0693093
FDNA100	100	FDNA	(22° 17'N, 157° 01'W)	FK180310	150	0.15319	0.0579214	0.0175952	0.000631985	0.000252189	0.0767894
FDNA100	100	FDNA	(22° 17'N, 157° 01'W)	FK180310	175	0.115691	0.0358885	0.0142111	0.000269343	0.000208691	0.0651136
FDNA100	100	FDNA	(22° 17'N, 157° 01'W)	FK180310	200	0.0747516	0.0252621	0.0101372	0.000207378	0.00016273	0.0389822
FDNA100	100	FDNA	(22° 17'N, 157° 01'W)	FK180310	225	0.0632683	0.0189577	0.00918096	0.000195131	0.000153583	0.0347809
FDNA100	100	FDNA	(22° 17'N, 157° 01'W)	FK180310	250	0.0397257	0.0116287	0.00600757	0.000130313	9.60928e-05	0.021863
FDNA100	100	FDNA	(22° 17'N, 157° 01'W)	FK180310	500	0.0177447	0.00138826	0.00895649	6.48948e-05	5.09322e-05	0.00728411
FDNA100	100	FDNA	(22° 17'N, 157° 01'W)	FK180310	750	0.000302477	4.2792e-05	0.000146668	2.77219e-06	5.91933e-06	0.000104326
FDNA100	100	FDNA	(22° 17'N, 157° 01'W)	FK180310	770	0.0035904	0.00039663	0.00249592	7.11321e-06	1.42129e-05	0.000676521
FDNA100	100	FDNA	(22° 17'N, 157° 01'W)	FK180310	1000	0.00177697	0.000330405	0.00100035	7.08472e-06	9.06913e-06	0.000430062
FDNA100	100	FDNA	(22° 17'N, 157° 01'W)	FK180310	4000	0.00102209	4.57716e-05	0.00069608	3.98227e-06	5.08522e-06	0.000271167
FDNA125	125	FDNA	(22° 45'N, 158° 00'W)	HOT297	5	0.0490622	0.00666448	0.0269004	0.000496225	0.000228703	0.0147724
FDNA125	125	FDNA	(22° 45'N, 158° 00'W)	HOT297	15	0.0674433	0.00598492	0.0438526	0.00079728	0.000163069	0.0166454
FDNA125	125	FDNA	(22° 45'N, 158° 00'W)	HOT297	25	0.0898632	0.00603068	0.0588918	0.00173969	0.000392161	0.0228088
FDNA125	125	FDNA	(22° 45'N, 158° 00'W)	HOT297	45	0.0602875	0.00698613	0.0351035	0.000498293	0.000294714	0.0174048
FDNA125	125	FDNA	(22° 45'N, 158° 00'W)	HOT297	75	0.0792339	0.00899491	0.0451165	0.000884143	0.000465321	0.023773
FDNA125	125	FDNA	(22° 45'N, 158° 00'W)	HOT297	100	0.0951642	0.0195174	0.038851	0.00115347	0.000617531	0.0350247
FDNA125	125	FDNA	(22° 45'N, 158° 00'W)	HOT297	125	0.158396	0.0231456	0.0633387	0.00357428	0.00255639	0.0657811
FDNA125	125	FDNA	(22° 45'N, 158° 00'W)	HOT297	150	0.115163	0.0227693	0.0338728	0.00126003	0.00314538	0.0541151
FDNA125	125	FDNA	(22° 45'N, 158° 00'W)	HOT297	175	0.0900428	0.0149094	0.0240196	0.000872822	0.00310217	0.0471389
FDNA125	125	FDNA	(22° 45'N, 158° 00'W)	HOT297	200	0.0711251	0.00978703	0.0226629	0.00089356	0.00338734	0.0343943
FDNA125	125	FDNA	(22° 45'N, 158° 00'W)	HOT297	225	0.0464272	0.00720802	0.0130802	0.000463716	0.00213884	0.0235365
FDNA125	125	FDNA	(22° 45'N, 158° 00'W)	HOT297	250	0.0300785	0.00432867	0.0083383	0.000328407	0.00137919	0.0157039
FDNA125	125	FDNA	(22° 45'N, 158° 00'W)	HOT297	500	0.0268472	0.00085174	0.011991	0.000572562	0.00101464	0.0124173
FDNA125	125	FDNA	(22° 45'N, 158° 00'W)	HOT297	750	0.00358503	4.91438e-05	0.00208454	4.38631e-05	0.000344902	0.00106258
FDNA125	125	FDNA	(22° 45'N, 158° 00'W)	HOT297	770	0.00683023	0.00024361	0.0042414	6.0943e-05	0.000865016	0.00141926
FDNA125	125	FDNA	(22° 45'N, 158° 00'W)	HOT297	1000	0.00680143	0.000133543	0.00459871	6.16684e-05	0.000462362	0.00154514
FDNA125	125	FDNA	(22° 45'N, 158° 00'W)	HOT297	4000	0.00293038	5.0469e-05	0.00188629	3.9763e-05	0.000123546	0.00083031
FDNA250	250	FDNA	(22° 17'N, 157° 01'W)	FK180310	5	0.0318739	0.00283989	0.0214955	0.000297615	0.000232318	0.00700861
FDNA250	250	FDNA	(22° 17'N, 157° 01'W)	FK180310	15	0.0765841	0.00289963	0.0630916	0.000490407	0.000159697	0.0099428
FDNA250	250	FDNA	(22° 17'N, 157° 01'W)	FK180310	25	0.0561065	0.00273824	0.0388188	0.00116108	0.000403225	0.0129852
FDNA250	250	FDNA	(22° 17'N, 157° 01'W)	FK180310	45	0.0380668	0.00297983	0.0257941	0.000352411	0.000350392	0.0085901
FDNA250	250	FDNA	(22° 17'N, 157° 01'W)	FK180310	75	0.0533721	0.00357892	0.0356434	0.000654054	0.00060202	0.0128937
FDNA250	250	FDNA	(22° 17'N, 157° 01'W)	FK180310	100	0.0569174	0.00566074	0.0346447	0.000859695	0.000729345	0.0150229
FDNA250	250	FDNA	(22° 17'N, 157° 01'W)	FK180310	125	0.117641	0.00604855	0.0676765	0.00315522	0.00195068	0.0388099
FDNA250	250	FDNA	(22° 17'N, 157° 01'W)	FK180310	150	0.0784197	0.00493736	0.0424595	0.0012299	0.00184689	0.0279461
FDNA250	250	FDNA	(22° 17'N, 157° 01'W)	FK180310	175	0.0696631	0.0039102	0.0320741	0.000702328	0.00205126	0.0309252
FDNA250	250	FDNA	(22° 17'N, 157° 01'W)	FK180310	200	0.085238	0.00389947	0.0429507	0.00102641	0.00277088	0.0345905
FDNA250	250	FDNA	(22° 17'N, 157° 01'W)	FK180310	225	0.080471	0.0060939	0.0290243	0.00055764	0.00203923	0.042756
FDNA250	250	FDNA	(22° 17'N, 157° 01'W)	FK180310	250	0.0918125	0.00710459	0.0286831	0.000638973	0.00202401	0.0533618
FDNA250	250	FDNA	(22° 17'N, 157° 01'W)	FK180310	500	0.0947441	0.00371627	0.0441991	0.000825235	0.00115145	0.044852
FDNA250	250	FDNA	(22° 17'N, 157° 01'W)	FK180310	750	0.0111379	0.000208673	0.00708333	9.29453e-05	0.000288978	0.00346398
FDNA250	250	FDNA	(22° 17'N, 157° 01'W)	FK180310	770	0.0207042	0.000555049	0.0151061	0.000135198	0.000680538	0.00422728
FDNA250	250	FDNA	(22° 17'N, 157° 01'W)	FK180310	1000	0.0229124	0.000544582	0.0163486	0.000157369	0.000425721	0.00543614
FDNA250	250	FDNA	(22° 17'N, 157° 01'W)	FK180310	4000	0.0134248	0.000143296	0.0108463	8.4761e-05	0.000178992	0.00217141
FDNA500	500	FDNA	(22° 45'N, 158° 00'W)	HOT297	5	0.113413	0.02622	0.0514079	0.000441619	0.000649554	0.0346944
FDNA500	500	FDNA	(22° 45'N, 158° 00'W)	HOT297	15	0.168638	0.0289195	0.0940064	0.000578813	0.000506062	0.0446275
FDNA500	500	FDNA	(22° 45'N, 158° 00'W)	HOT297	25	0.170049	0.024813	0.0980569	0.000901098	0.000914045	0.0453642
FDNA500	500	FDNA	(22° 45'N, 158° 00'W)	HOT297	45	0.126543	0.0261418	0.0618947	0.000501242	0.000729881	0.0372755
FDNA500	500	FDNA	(22° 45'N, 158° 00'W)	HOT297	75	0.124983	0.0229585	0.0653905	0.000573418	0.000806312	0.0352537
FDNA500	500	FDNA	(22° 45'N, 158° 00'W)	HOT297	100	0.0639548	0.0133399	0.0332625	0.00031307	0.000333849	0.0167054
FDNA500	500	FDNA	(22° 45'N, 158° 00'W)	HOT297	125	0.0391865	0.00615838	0.0206282	0.000554635	0.000313672	0.0115317
FDNA500	500	FDNA	(22° 45'N, 158° 00'W)	HOT297	150	0.0192908	0.00336771	0.0084358	0.000254476	0.000235845	0.00699692
FDNA500	500	FDNA	(22° 45'N, 158° 00'W)	HOT297	175	0.0112788	0.00189462	0.00375383	0.00014709	0.000264456	0.00521878
FDNA500	500	FDNA	(22° 45'N, 158° 00'W)	HOT297	200	0.0103209	0.00145846	0.004147	0.000174215	0.000647859	0.0038934
FDNA500	500	FDNA	(22° 45'N, 158° 00'W)	HOT297	225	0.011457	0.0017054	0.00320195	0.000124739	0.000767971	0.00565699
FDNA500	500	FDNA	(22° 45'N, 158° 00'W)	HOT297	250	0.0136649	0.00175688	0.0034044	0.000120924	0.00126355	0.00711912
FDNA500	500	FDNA	(22° 45'N, 158° 00'W)	HOT297	500	0.0871251	0.00787986	0.0206948	0.000550746	0.00551228	0.0524874
FDNA500	500	FDNA	(22° 45'N, 158° 00'W)	HOT297	750	0.00683444	0.000561	0.0021275	5.66719e-05	0.00213111	0.00195816
FDNA500	500	FDNA	(22° 45'N, 158° 00'W)	HOT297	770	0.0129607	0.00145193	0.00432972	8.37541e-05	0.00342002	0.00367525
FDNA500	500	FDNA	(22° 45'N, 158° 00'W)	HOT297	1000	0.0144914	0.00111295	0.00710518	6.06261e-05	0.00287202	0.00334059
FDNA500	500	FDNA	(22° 45'N, 158° 00'W)	HOT297	4000	0.0048468	0.0002929	0.00280407	3.1094e-05	0.000561423	0.00115732
FDNA1000	1000	FDNA	(22° 45'N, 158° 00'W)	HOT302	5	0.0724987	0.00203829	0.0466132	0.00115238	0.000563249	0.0221316
FDNA1000	1000	FDNA	(22° 45'N, 158° 00'W)	HOT302	15	0.134259	0.00230988	0.0967943	0.00189645	0.000475381	0.0327828
FDNA1000	1000	FDNA	(22° 45'N, 158° 00'W)	HOT302	25	0.137184	0.0024631	0.0895609	0.00349506	0.000745282	0.0409193
FDNA1000	1000	FDNA	(22° 45'N, 158° 00'W)	HOT302	45	0.0814001	0.00204349	0.055296	0.00103825	0.000450669	0.0225716
FDNA1000	1000	FDNA	(22° 45'N, 158° 00'W)	HOT302	75	0.0928341	0.0022077	0.0614658	0.00163243	0.00047092	0.0270573
FDNA1000	1000	FDNA	(22° 45'N, 158° 00'W)	HOT302	100	0.0586196	0.00150324	0.0373689	0.00144398	0.000411767	0.0178917
FDNA1000	1000	FDNA	(22° 45'N, 158° 00'W)	HOT302	125	0.105248	0.00123237	0.0562886	0.00419134	0.00142376	0.0421116
FDNA1000	1000	FDNA	(22° 45'N, 158° 00'W)	HOT302	150	0.0583024	0.00102064	0.0313901	0.00151675	0.00146959	0.0229053
FDNA1000	1000	FDNA	(22° 45'N, 158° 00'W)	HOT302	175	0.0461544	0.000917902	0.0225713	0.00101585	0.00149912	0.0201503
FDNA1000	1000	FDNA	(22° 45'N, 158° 00'W)	HOT302	200	0.0467449	0.00085809	0.0233948	0.00107957	0.00185327	0.0195592
FDNA1000	1000	FDNA	(22° 45'N, 158° 00'W)	HOT302	225	0.0276598	0.00109329	0.0123743	0.000580454	0.00121147	0.0124003
FDNA1000	1000	FDNA	(22° 45'N, 158° 00'W)	HOT302	250	0.0220468	0.00119271	0.00813608	0.000488009	0.0010464	0.0111836
FDNA1000	1000	FDNA	(22° 45'N, 158° 00'W)	HOT302	500	0.066527	0.00484771	0.0166685	0.00105449	0.00217784	0.0417784
FDNA1000	1000	FDNA	(22° 45'N, 158° 00'W)	HOT302	750	0.00765822	0.000705273	0.0023528	9.54866e-05	0.00103682	0.00346783
FDNA1000	1000	FDNA	(22° 45'N, 158° 00'W)	HOT302	770	0.0142803	0.00185985	0.00462091	0.000149849	0.0018785	0.00577117
FDNA1000	1000	FDNA	(22° 45'N, 158° 00'W)	HOT302	1000	0.0177368	0.00195607	0.00532595	0.000169439	0.0019063	0.00837909
FDNA1000	1000	FDNA	(22° 45'N, 158° 00'W)	HOT302	4000	0.00977463	0.000663906	0.00422323	9.88733e-05	0.000816307	0.00397232
